# Supplementary material for: Split drive killer-rescue provides a novel threshold-dependent gene drive
Source: PubMed Central journal article supplement (PMC7689494; doi:10.1038/s41598-020-77544-7), 2020-11-25
Supplement: 41598_2020_77544_MOESM2_ESM.pdf [file 41598_2020_77544_MOESM2_ESM.pdf]

# Split drive killer-rescue provides a novel threshold-dependent gene drive

Matthew P. Edgington<sup>1\*</sup>, Tim Harvey-Samuel<sup>1</sup> and Luke Alphey<sup>1</sup>

<sup>1</sup>The Pirbright Institute, Ash Road, Woking, Surrey GU24 0NF, UK

\*Corresponding author: matt.edgington@pirbright.ac.uk

## Supplementary Model 2

We begin here by defining a set of parameter values for use throughout this study. This is as follows:

- $L = 1$  (full lethal penetrance),
- $\varepsilon_A = 0.85$  (relative to 1 in wild-type individuals - 15% fitness cost),
- $\varepsilon_B = 0.85$  (relative to 1 in wild-type individuals - 15% fitness cost),
- $\varepsilon_R = 1$  (resistant alleles give no fitness cost),
- $C = 0.9$  (90% of eligible wild-type sequences are cleaved),
- $\Phi = 0.9C$  (90% of cleaved sequences are repaired via homing of transgenic constructs),
- $\eta = 0.1C$  (10% of cleaved sequences are repaired via end-joining producing resistant alleles).

The relative fitness parameters defined above are combined multiplicatively to obtain a single overall relative fitness value for each genotype (assumed equal for both sexes). These are of the form:

$$\begin{aligned} \Omega_{bbaa} &= 1, & \Omega_{bbAa} &= (1-L)\varepsilon_A, & \Omega_{bbRa} &= \varepsilon_R, & \Omega_{bbAA} &= (1-L)\varepsilon_A^2, & \Omega_{bbAR} &= (1-L)\varepsilon_A\varepsilon_R, & \Omega_{bbRR} &= \varepsilon_R^2, \\ \Omega_{Bbaa} &= \varepsilon_B, & \Omega_{BbAa} &= \varepsilon_B\varepsilon_A, & \Omega_{BbRa} &= \varepsilon_B\varepsilon_R, & \Omega_{BbAA} &= \varepsilon_B\varepsilon_A^2, & \Omega_{BbAR} &= \varepsilon_B\varepsilon_A\varepsilon_R, & \Omega_{BbRR} &= \varepsilon_B\varepsilon_R^2, \\ \Omega_{BBaa} &= \varepsilon_B^2, & \Omega_{BBAa} &= \varepsilon_B^2\varepsilon_A, & \Omega_{BBRa} &= \varepsilon_B^2\varepsilon_R, & \Omega_{BBAA} &= \varepsilon_B^2\varepsilon_A^2, & \Omega_{BBAR} &= \varepsilon_B^2\varepsilon_A\varepsilon_R, & \Omega_{BBRR} &= \varepsilon_B^2\varepsilon_R^2. \end{aligned}$$

We then define a set of initial conditions representing the genotype proportions in the population at the point of introducing transgenics into the wild population. For a 1:1 (introduced:wild) release of individuals homozygous for both transgenic constructs, as is most widely considered in this study these are of the form:

$$\begin{aligned} M_{bbaa}(1) &= 0.25 = F_{bbaa}(1), & M_{bbAa}(1) &= 0.00 = F_{bbAa}(1), & M_{bbRa}(1) &= 0.00 = F_{bbRa}(1), \\ M_{bbAA}(1) &= 0.00 = F_{bbAA}(1), & M_{bbAR}(1) &= 0.00 = F_{bbAR}(1), & M_{bbRR}(1) &= 0.00 = F_{bbRR}(1), \\ M_{Bbaa}(1) &= 0.00 = F_{Bbaa}(1), & M_{BbAa}(1) &= 0.00 = F_{BbAa}(1), & M_{BbRa}(1) &= 0.00 = F_{BbRa}(1), \\ M_{BbAA}(1) &= 0.00 = F_{BbAA}(1), & M_{BbAR}(1) &= 0.00 = F_{BbAR}(1), & M_{BbRR}(1) &= 0.00 = F_{BbRR}(1), \\ M_{BBaa}(1) &= 0.00 = F_{BBaa}(1), & M_{BBAa}(1) &= 0.00 = F_{BBAa}(1), & M_{BBRa}(1) &= 0.00 = F_{BBRa}(1), \\ M_{BBAA}(1) &= 0.25 = F_{BBAA}(1), & M_{BBAR}(1) &= 0.00 = F_{BBAR}(1), & M_{BBRR}(1) &= 0.00 = F_{BBRR}(1). \end{aligned}$$

With the above definitions we are then able to iteratively calculate the genotype frequencies in each subsequent generation. This process is conducted in a two step manner. The first stage is to calculate the proportional frequencies for each genotype (and for each sex), which is achieved using:

$$\begin{aligned} M_{bbaa}^e &= \left( \frac{\Omega_{bbaa}}{2} \right) [M_{bbaa}(i-1)F_{bbaa}(i-1) + 0.5M_{bbaa}(i-1)F_{bbAa}(i-1) + 0.5M_{bbaa}(i-1)F_{bbRa}(i-1) \\ &+ 0.5M_{bbaa}(i-1)F_{Bbaa}(i-1) + 0.25M_{bbaa}(i-1)(1-\Phi-\eta)F_{BbAa}(i-1) + 0.25M_{bbaa}(i-1)F_{BbRa}(i-1) \\ &+ 0.5M_{bbAa}(i-1)F_{bbaa}(i-1) + 0.25M_{bbAa}(i-1)F_{bbAa}(i-1) + 0.25M_{bbAa}(i-1)F_{bbRa}(i-1) \end{aligned}$$

$$\begin{aligned}
& + 0.25M_{bbAa}(i-1)F_{Bbaa}(i-1) + 0.125M_{bbAa}(i-1)(1-\Phi-\eta)F_{BbAa}(i-1) \\
& + 0.125M_{bbAa}(i-1)F_{BbRa}(i-1) + 0.5M_{bbRa}(i-1)F_{bbaa}(i-1) + 0.25M_{bbRa}(i-1)F_{bbAa}(i-1) \\
& + 0.25M_{bbRa}(i-1)F_{bbRa}(i-1) + 0.25M_{bbRa}(i-1)F_{Bbaa}(i-1) + 0.125M_{bbRa}(i-1)(1-\Phi-\eta)F_{BbAa}(i-1) \\
& + 0.125M_{bbRa}(i-1)F_{BbRa}(i-1) + 0.5M_{Bbaa}(i-1)F_{bbaa}(i-1) + 0.25M_{Bbaa}(i-1)F_{bbAa}(i-1) \\
& + 0.25M_{Bbaa}(i-1)F_{bbRa}(i-1) + 0.25M_{Bbaa}(i-1)F_{Bbaa}(i-1) + 0.125M_{Bbaa}(i-1)(1-\Phi-\eta)F_{BbAa}(i-1) \\
& + 0.125M_{Bbaa}(i-1)F_{BbRa}(i-1) + 0.25(1-\Phi-\eta)M_{BbAa}(i-1)F_{bbaa}(i-1) \\
& + 0.125(1-\Phi-\eta)M_{BbAa}(i-1)F_{bbAa}(i-1) + 0.125(1-\Phi-\eta)M_{BbAa}(i-1)F_{bbRa}(i-1) \\
& + 0.125(1-\Phi-\eta)M_{BbAa}(i-1)F_{Bbaa}(i-1) + 0.0625(1-\Phi-\eta)M_{BbAa}(i-1)(1-\Phi-\eta)F_{BbAa}(i-1) \\
& + 0.0625(1-\Phi-\eta)M_{BbAa}(i-1)F_{BbRa}(i-1) + 0.25M_{BbRa}(i-1)F_{bbaa}(i-1) \\
& + 0.125M_{BbRa}(i-1)F_{bbAa}(i-1) + 0.125M_{BbRa}(i-1)F_{bbRa}(i-1) + 0.125M_{BbRa}(i-1)F_{Bbaa}(i-1) \\
& + 0.0625M_{BbRa}(i-1)(1-\Phi-\eta)F_{BbAa}(i-1) + 0.0625M_{BbRa}(i-1)F_{BbRa}(i-1)], \\
M_{bbAa}^e & = \left( \frac{\Omega_{bbAa}}{2} \right) [0.5M_{bbaa}(i-1)F_{bbAa}(i-1) + M_{bbaa}(i-1)F_{bbAA}(i-1) + 0.5M_{bbaa}(i-1)F_{bbAR}(i-1) \\
& + 0.25M_{bbaa}(i-1)(1-\Phi-\eta)F_{BbAa}(i-1) + 0.5M_{bbaa}(i-1)\Phi F_{BbAa}(i-1) + 0.25M_{bbaa}(i-1)\eta F_{BbAa}(i-1) \\
& + 0.5M_{bbaa}(i-1)F_{BbAA}(i-1) + 0.25M_{bbaa}(i-1)F_{BbAR}(i-1) + 0.5M_{bbaa}(i-1)F_{bbaa}(i-1) \\
& + 0.5M_{bbAa}(i-1)F_{bbAa}(i-1) + 0.25M_{bbAa}(i-1)F_{bbRa}(i-1) + 0.5M_{bbAa}(i-1)F_{bbAA}(i-1) \\
& + 0.25M_{bbAa}(i-1)F_{bbAR}(i-1) + 0.25M_{bbAa}(i-1)F_{Bbaa}(i-1) + 0.25M_{bbAa}(i-1)(1-\Phi-\eta)F_{BbAa}(i-1) \\
& + 0.25M_{bbAa}(i-1)\Phi F_{BbAa}(i-1) + 0.125M_{bbAa}(i-1)\eta F_{BbAa}(i-1) + 0.125M_{bbAa}(i-1)F_{BbRa}(i-1) \\
& + 0.25M_{bbAa}(i-1)F_{BbAA}(i-1) + 0.125M_{bbAa}(i-1)F_{BbAR}(i-1) + 0.25M_{bbRa}(i-1)F_{bbAa}(i-1) \\
& + 0.5M_{bbRa}(i-1)F_{bbAA}(i-1) + 0.25M_{bbRa}(i-1)F_{bbAR}(i-1) + 0.125M_{bbRa}(i-1)(1-\Phi-\eta)F_{BbAa}(i-1) \\
& + 0.25M_{bbRa}(i-1)\Phi F_{BbAa}(i-1) + 0.125M_{bbRa}(i-1)\eta F_{BbAa}(i-1) + 0.25M_{bbRa}(i-1)F_{BbAA}(i-1) \\
& + 0.125M_{bbRa}(i-1)F_{BbAR}(i-1) + M_{bbAA}(i-1)F_{bbaa}(i-1) + 0.5M_{bbAA}(i-1)F_{bbAa}(i-1) \\
& + 0.5M_{bbAA}(i-1)F_{bbRa}(i-1) + 0.5M_{bbAA}(i-1)F_{Bbaa}(i-1) + 0.25M_{bbAA}(i-1)(1-\Phi-\eta)F_{BbAa}(i-1) \\
& + 0.25M_{bbAA}(i-1)F_{BbRa}(i-1) + 0.5M_{bbAR}(i-1)F_{bbaa}(i-1) + 0.25M_{bbAR}(i-1)F_{bbAa}(i-1) \\
& + 0.25M_{bbAR}(i-1)F_{bbRa}(i-1) + 0.25M_{bbAR}(i-1)F_{Bbaa}(i-1) + 0.125M_{bbAR}(i-1)(1-\Phi-\eta)F_{BbAa}(i-1) \\
& + 0.125M_{bbAR}(i-1)F_{BbRa}(i-1) + 0.25M_{Bbaa}(i-1)F_{bbAa}(i-1) + 0.5M_{Bbaa}(i-1)F_{bbAA}(i-1) \\
& + 0.25M_{Bbaa}(i-1)F_{bbAR}(i-1) + 0.125M_{Bbaa}(i-1)(1-\Phi-\eta)F_{BbAa}(i-1) \\
& + 0.25M_{Bbaa}(i-1)\Phi F_{BbAa}(i-1) + 0.125M_{Bbaa}(i-1)\eta F_{BbAa}(i-1) + 0.25M_{Bbaa}(i-1)F_{BbAA}(i-1) \\
& + 0.125M_{Bbaa}(i-1)F_{BbAR}(i-1) + 0.25(1-\Phi-\eta)M_{BbAa}(i-1)F_{bbaa}(i-1) + 0.5\Phi M_{BbAa}(i-1)F_{bbaa}(i-1) \\
& + 0.25\eta M_{BbAa}(i-1)F_{bbaa}(i-1) + 0.25(1-\Phi-\eta)M_{BbAa}(i-1)F_{bbAa}(i-1) + 0.25\Phi M_{BbAa}(i-1)F_{bbAa}(i-1) \\
& + 0.125\eta M_{BbAa}(i-1)F_{bbAa}(i-1) + 0.125(1-\Phi-\eta)M_{BbAa}(i-1)F_{bbRa}(i-1) \\
& + 0.25\Phi M_{BbAa}(i-1)F_{bbRa}(i-1) + 0.125\eta M_{BbAa}(i-1)F_{bbRa}(i-1) \\
& + 0.25(1-\Phi-\eta)M_{BbAa}(i-1)F_{bbAA}(i-1) + 0.125(1-\Phi-\eta)M_{BbAa}(i-1)F_{bbAR}(i-1) \\
& + 0.125(1-\Phi-\eta)M_{BbAa}(i-1)F_{Bbaa}(i-1) + 0.25\Phi M_{BbAa}(i-1)F_{Bbaa}(i-1) \\
& + 0.125\eta M_{BbAa}(i-1)F_{Bbaa}(i-1) + 0.125(1-\Phi-\eta)M_{BbAa}(i-1)(1-\Phi-\eta)F_{BbAa}(i-1) \\
& + 0.125\Phi M_{BbAa}(i-1)(1-\Phi-\eta)F_{BbAa}(i-1) + 0.0625\eta M_{BbAa}(i-1)(1-\Phi-\eta)F_{BbAa}(i-1) \\
& + 0.125(1-\Phi-\eta)M_{BbAa}(i-1)\Phi F_{BbAa}(i-1) + 0.0625(1-\Phi-\eta)M_{BbAa}(i-1)\eta F_{BbAa}(i-1) \\
& + 0.0625(1-\Phi-\eta)M_{BbAa}(i-1)F_{BbRa}(i-1) + 0.125\Phi M_{BbAa}(i-1)F_{BbRa}(i-1) \\
& + 0.0625\eta M_{BbAa}(i-1)F_{BbRa}(i-1) + 0.125(1-\Phi-\eta)M_{BbAa}(i-1)F_{BbAA}(i-1) \\
& + 0.0625(1-\Phi-\eta)M_{BbAa}(i-1)F_{BbAR}(i-1) + 0.125(1-\Phi-\eta)M_{BbAa}(i-1)\Phi F_{BbAa}(i-1) \\
& + 0.0625(1-\Phi-\eta)M_{BbAa}(i-1)\eta F_{BbAa}(i-1) + 0.125M_{BbRa}(i-1)F_{bbAa}(i-1) \\
& + 0.0625(1-\Phi-\eta)M_{BbRa}(i-1)(1-\Phi-\eta)F_{BbAa}(i-1) + 0.125M_{BbRa}(i-1)\Phi F_{BbAa}(i-1) \\
& + 0.0625M_{BbRa}(i-1)\eta F_{BbAa}(i-1) + 0.125M_{BbRa}(i-1)F_{BbAA}(i-1) + 0.0625M_{BbRa}(i-1)F_{BbAR}(i-1) \\
& + 0.5M_{BbAA}(i-1)F_{bbaa}(i-1) + 0.25M_{BbAA}(i-1)F_{bbAa}(i-1) + 0.25M_{BbAA}(i-1)F_{bbRa}(i-1) \\
& + 0.25M_{BbAA}(i-1)F_{Bbaa}(i-1) + 0.125M_{BbAA}(i-1)(1-\Phi-\eta)F_{BbAa}(i-1) \\
& + 0.125M_{BbAA}(i-1)F_{BbRa}(i-1) + 0.25M_{BbAR}(i-1)F_{bbaa}(i-1) + 0.125M_{BbAR}(i-1)F_{bbAa}(i-1)
\end{aligned}$$

$$\begin{aligned}
& + 0.125M_{BbAR}(i-1)F_{bbRa}(i-1) + 0.125M_{BbAR}(i-1)F_{Bbaa}(i-1) \\
& + 0.0625M_{BbAR}(i-1)(1-\Phi-\eta)F_{BbAa}(i-1) + 0.0625M_{BbAR}(i-1)F_{BbRa}(i-1)], \\
M_{bbRa}^e & = \left(\frac{\Omega_{bbRa}}{2}\right) [0.5M_{bbAa}(i-1)F_{bbRa}(i-1) + 0.5M_{bbAa}(i-1)F_{bbAR}(i-1) + M_{bbAa}(i-1)F_{bbRR}(i-1) \\
& + 0.25M_{bbAa}(i-1)\eta F_{BbAa}(i-1) + 0.25M_{bbAa}(i-1)F_{BbRa}(i-1) + 0.25M_{bbAa}(i-1)F_{BbAR}(i-1) \\
& + 0.5M_{bbAa}(i-1)F_{BbRR}(i-1) + 0.25M_{bbAa}(i-1)F_{bbRa}(i-1) + 0.25M_{bbAa}(i-1)F_{bbAR}(i-1) \\
& + 0.5M_{bbAa}(i-1)F_{bbRR}(i-1) + 0.125M_{bbAa}(i-1)\eta F_{BbAa}(i-1) + 0.125M_{bbAa}(i-1)F_{BbRa}(i-1) \\
& + 0.125M_{bbAa}(i-1)F_{BbAR}(i-1) + 0.25M_{bbAa}(i-1)F_{BbRR}(i-1) + 0.5M_{bbRa}(i-1)F_{bbAa}(i-1) \\
& + 0.25M_{bbRa}(i-1)F_{bbAa}(i-1) + 0.5M_{bbRa}(i-1)F_{bbRa}(i-1) + 0.25M_{bbRa}(i-1)F_{bbAR}(i-1) \\
& + 0.5M_{bbRa}(i-1)F_{bbRR}(i-1) + 0.25M_{bbRa}(i-1)F_{Bbaa}(i-1) + 0.125M_{bbRa}(i-1)(1-\Phi-\eta)F_{BbAa}(i-1) \\
& + 0.125M_{bbRa}(i-1)\eta F_{BbAa}(i-1) + 0.25M_{bbRa}(i-1)F_{BbRa}(i-1) + 0.125M_{bbRa}(i-1)F_{BbAR}(i-1) \\
& + 0.25M_{bbRa}(i-1)F_{BbRR}(i-1) + 0.5M_{bbAR}(i-1)F_{bbAa}(i-1) + 0.25M_{bbAR}(i-1)F_{bbAa}(i-1) \\
& + 0.25M_{bbAR}(i-1)F_{bbRa}(i-1) + 0.25M_{bbAR}(i-1)F_{Bbaa}(i-1) + 0.125M_{bbAR}(i-1)(1-\Phi-\eta)F_{BbAa}(i-1) \\
& + 0.125M_{bbAR}(i-1)F_{BbRa}(i-1) + M_{bbRR}(i-1)F_{bbAa}(i-1) + 0.5M_{bbRR}(i-1)F_{bbAa}(i-1) \\
& + 0.5M_{bbRR}(i-1)F_{bbRa}(i-1) + 0.5M_{bbRR}(i-1)F_{Bbaa}(i-1) + 0.25M_{bbRR}(i-1)(1-\Phi-\eta)F_{BbAa}(i-1) \\
& + 0.25M_{bbRR}(i-1)F_{BbRa}(i-1) + 0.25M_{Bbaa}(i-1)F_{bbRa}(i-1) + 0.25M_{Bbaa}(i-1)F_{bbAR}(i-1) \\
& + 0.5M_{Bbaa}(i-1)F_{bbRR}(i-1) + 0.125M_{Bbaa}(i-1)\eta F_{BbAa}(i-1) + 0.125M_{Bbaa}(i-1)F_{BbRa}(i-1) \\
& + 0.125M_{Bbaa}(i-1)F_{BbAR}(i-1) + 0.25M_{Bbaa}(i-1)F_{BbRR}(i-1) + 0.25\eta M_{BbAa}(i-1)F_{bbAa}(i-1) \\
& + 0.125\eta M_{BbAa}(i-1)F_{bbAa}(i-1) + 0.125(1-\Phi-\eta)M_{BbAa}(i-1)F_{bbRa}(i-1) \\
& + 0.125\eta M_{BbAa}(i-1)F_{bbRa}(i-1) + 0.125(1-\Phi-\eta)M_{BbAa}(i-1)F_{bbAR}(i-1) \\
& + 0.25(1-\Phi-\eta)M_{BbAa}(i-1)F_{bbRR}(i-1) + 0.125\eta M_{BbAa}(i-1)F_{Bbaa}(i-1) \\
& + 0.0625\eta M_{BbAa}(i-1)(1-\Phi-\eta)F_{BbAa}(i-1) + 0.0625(1-\Phi-\eta)M_{BbAa}(i-1)\eta F_{BbAa}(i-1) \\
& + 0.0625(1-\Phi-\eta)M_{BbAa}(i-1)F_{BbRa}(i-1) + 0.0625\eta M_{BbAa}(i-1)F_{BbRa}(i-1) \\
& + 0.0625(1-\Phi-\eta)M_{BbAa}(i-1)F_{BbAR}(i-1) + 0.125(1-\Phi-\eta)M_{BbAa}(i-1)F_{BbRR}(i-1) \\
& + 0.0625(1-\Phi-\eta)M_{BbAa}(i-1)\eta F_{BbAa}(i-1) + 0.25M_{BbRa}(i-1)F_{bbAa}(i-1) \\
& + 0.125M_{BbRa}(i-1)F_{bbAa}(i-1) + 0.25M_{BbRa}(i-1)F_{bbRa}(i-1) + 0.125M_{BbRa}(i-1)F_{bbAR}(i-1) \\
& + 0.25M_{BbRa}(i-1)F_{bbRR}(i-1) + 0.125M_{BbRa}(i-1)F_{Bbaa}(i-1) \\
& + 0.0625M_{BbRa}(i-1)(1-\Phi-\eta)F_{BbAa}(i-1) + 0.0625M_{BbRa}(i-1)\eta F_{BbAa}(i-1) \\
& + 0.125M_{BbRa}(i-1)F_{BbRa}(i-1) + 0.0625M_{BbRa}(i-1)F_{BbAR}(i-1) + 0.125M_{BbRa}(i-1)F_{BbRR}(i-1) \\
& + 0.25M_{BbAR}(i-1)F_{bbAa}(i-1) + 0.125M_{BbAR}(i-1)F_{bbAa}(i-1) + 0.125M_{BbAR}(i-1)F_{bbRa}(i-1) \\
& + 0.125M_{BbAR}(i-1)F_{Bbaa}(i-1) + 0.0625M_{BbAR}(i-1)(1-\Phi-\eta)F_{BbAa}(i-1) \\
& + 0.0625M_{BbAR}(i-1)F_{BbRa}(i-1) + 0.5M_{BbRR}(i-1)F_{bbAa}(i-1) + 0.25M_{BbRR}(i-1)F_{bbAa}(i-1) \\
& + 0.25M_{BbRR}(i-1)F_{bbRa}(i-1) + 0.25M_{BbRR}(i-1)F_{Bbaa}(i-1) \\
& + 0.125M_{BbRR}(i-1)(1-\Phi-\eta)F_{BbAa}(i-1) + 0.125M_{BbRR}(i-1)F_{BbRa}(i-1)], \\
M_{bbAA}^e & = \left(\frac{\Omega_{bbAA}}{2}\right) [0.25M_{bbAa}(i-1)F_{bbAa}(i-1) + 0.5M_{bbAa}(i-1)F_{bbAA}(i-1) + 0.25M_{bbAa}(i-1)F_{bbAR}(i-1) \\
& + 0.125M_{bbAa}(i-1)(1-\Phi-\eta)F_{BbAa}(i-1) + 0.25M_{bbAa}(i-1)\Phi F_{BbAa}(i-1) \\
& + 0.125M_{bbAa}(i-1)\eta F_{BbAa}(i-1) + 0.25M_{bbAa}(i-1)F_{BbAA}(i-1) + 0.125M_{bbAa}(i-1)F_{BbAR}(i-1) \\
& + 0.5M_{bbAA}(i-1)F_{bbAa}(i-1) + M_{bbAA}(i-1)F_{bbAA}(i-1) + 0.5M_{bbAA}(i-1)F_{bbAR}(i-1) \\
& + 0.25M_{bbAA}(i-1)(1-\Phi-\eta)F_{BbAa}(i-1) + 0.5M_{bbAA}(i-1)\Phi F_{BbAa}(i-1) \\
& + 0.25M_{bbAA}(i-1)\eta F_{BbAa}(i-1) + 0.5M_{bbAA}(i-1)F_{BbAA}(i-1) + 0.25M_{bbAA}(i-1)F_{BbAR}(i-1) \\
& + 0.25M_{bbAR}(i-1)F_{bbAa}(i-1) + 0.5M_{bbAR}(i-1)F_{bbAA}(i-1) + 0.25M_{bbAR}(i-1)F_{bbAR}(i-1) \\
& + 0.125M_{bbAR}(i-1)(1-\Phi-\eta)F_{BbAa}(i-1) + 0.25M_{bbAR}(i-1)\Phi F_{BbAa}(i-1) \\
& + 0.125M_{bbAR}(i-1)\eta F_{BbAa}(i-1) + 0.25M_{bbAR}(i-1)F_{BbAA}(i-1) + 0.125M_{bbAR}(i-1)F_{BbAR}(i-1) \\
& + 0.125(1-\Phi-\eta)M_{BbAa}(i-1)F_{bbAa}(i-1) + 0.25\Phi M_{BbAa}(i-1)F_{bbAa}(i-1) \\
& + 0.125\eta M_{BbAa}(i-1)F_{bbAa}(i-1) + 0.25(1-\Phi-\eta)M_{BbAa}(i-1)F_{bbAA}(i-1)
\end{aligned}$$

$$\begin{aligned}
& + 0.5\Phi M_{BbAa}(i-1)F_{bbAA}(i-1) + 0.25\eta M_{BbAa}(i-1)F_{bbAA}(i-1) \\
& + 0.125(1-\Phi-\eta)M_{BbAa}(i-1)F_{bbAR}(i-1) + 0.25\Phi M_{BbAa}(i-1)F_{bbAR}(i-1) \\
& + 0.125\eta M_{BbAa}(i-1)F_{bbAR}(i-1) + 0.0625(1-\Phi-\eta)M_{BbAa}(i-1)(1-\Phi-\eta)F_{BbAa}(i-1) \\
& + 0.125\Phi M_{BbAa}(i-1)(1-\Phi-\eta)F_{BbAa}(i-1) + 0.0625\eta M_{BbAa}(i-1)(1-\Phi-\eta)F_{BbAa}(i-1) \\
& + 0.125(1-\Phi-\eta)M_{BbAa}(i-1)\Phi F_{BbAa}(i-1) + 0.0625(1-\Phi-\eta)M_{BbAa}(i-1)\eta F_{BbAa}(i-1) \\
& + 0.25\Phi M_{BbAa}(i-1)\Phi F_{BbAa}(i-1) + 0.125\Phi M_{BbAa}(i-1)\eta F_{BbAa}(i-1) + 0.125\eta M_{BbAa}(i-1)\Phi F_{BbAa}(i-1) \\
& + 0.0625\eta M_{BbAa}(i-1)\eta F_{BbAa}(i-1) + 0.125(1-\Phi-\eta)M_{BbAa}(i-1)F_{BbAA}(i-1) \\
& + 0.25\Phi M_{BbAa}(i-1)F_{BbAA}(i-1) + 0.125\eta M_{BbAa}(i-1)F_{BbAA}(i-1) \\
& + 0.0625(1-\Phi-\eta)M_{BbAa}(i-1)F_{BbAR}(i-1) + 0.125\Phi M_{BbAa}(i-1)F_{BbAR}(i-1) \\
& + 0.0625\eta M_{BbAa}(i-1)F_{BbAR}(i-1) + 0.125(1-\Phi-\eta)M_{BbAa}(i-1)\Phi F_{BbAA}(i-1) \\
& + 0.0625(1-\Phi-\eta)M_{BbAa}(i-1)\eta F_{BbAA}(i-1) + 0.25M_{BbAA}(i-1)F_{bbAa}(i-1) \\
& + 0.5M_{BbAA}(i-1)F_{bbAA}(i-1) + 0.25M_{BbAA}(i-1)F_{bbAR}(i-1) \\
& + 0.125M_{BbAA}(i-1)(1-\Phi-\eta)F_{BbAa}(i-1) + 0.25M_{BbAA}(i-1)\Phi F_{BbAa}(i-1) \\
& + 0.125M_{BbAA}(i-1)\eta F_{BbAa}(i-1) + 0.25M_{BbAA}(i-1)F_{BbAA}(i-1) + 0.125M_{BbAA}(i-1)F_{BbAR}(i-1) \\
& + 0.125M_{BbAR}(i-1)F_{bbAa}(i-1) + 0.25M_{BbAR}(i-1)F_{bbAA}(i-1) + 0.125M_{BbAR}(i-1)F_{bbAR}(i-1) \\
& + 0.0625M_{BbAR}(i-1)(1-\Phi-\eta)F_{BbAa}(i-1) + 0.125M_{BbAR}(i-1)\Phi F_{BbAa}(i-1) \\
& + 0.0625M_{BbAR}(i-1)\eta F_{BbAa}(i-1) + 0.125M_{BbAR}(i-1)F_{BbAA}(i-1) + 0.0625M_{BbAR}(i-1)F_{BbAR}(i-1)], \\
M_{bbAR}^e = & \left(\frac{\Omega_{bbAR}}{2}\right) [0.25M_{bbAa}(i-1)F_{bbRa}(i-1) + 0.25M_{bbAa}(i-1)F_{bbAR}(i-1) + 0.5M_{bbAa}(i-1)F_{bbRR}(i-1) \\
& + 0.125M_{bbAa}(i-1)\eta F_{BbAa}(i-1) + 0.125M_{bbAa}(i-1)F_{BbRa}(i-1) + 0.125M_{bbAa}(i-1)F_{BbAR}(i-1) \\
& + 0.25M_{bbAa}(i-1)F_{BbRR}(i-1) + 0.25M_{bbRa}(i-1)F_{bbAa}(i-1) + 0.5M_{bbRa}(i-1)F_{bbAA}(i-1) \\
& + 0.25M_{bbRa}(i-1)F_{bbAR}(i-1) + 0.125M_{bbRa}(i-1)(1-\Phi-\eta)F_{BbAa}(i-1) \\
& + 0.25M_{bbRa}(i-1)\Phi F_{BbAa}(i-1) + 0.125M_{bbRa}(i-1)\eta F_{BbAa}(i-1) + 0.25M_{bbRa}(i-1)F_{BbAA}(i-1) \\
& + 0.125M_{bbRa}(i-1)F_{BbAR}(i-1) + 0.5M_{bbAA}(i-1)F_{bbRa}(i-1) + 0.5M_{bbAA}(i-1)F_{bbAR}(i-1) \\
& + M_{bbAA}(i-1)F_{bbRR}(i-1) + 0.25M_{bbAA}(i-1)\eta F_{BbAa}(i-1) + 0.25M_{bbAA}(i-1)F_{BbRa}(i-1) \\
& + 0.25M_{bbAA}(i-1)F_{BbAR}(i-1) + 0.5M_{bbAA}(i-1)F_{BbRR}(i-1) + 0.25M_{bbAR}(i-1)F_{bbAa}(i-1) \\
& + 0.25M_{bbAR}(i-1)F_{bbRa}(i-1) + 0.5M_{bbAR}(i-1)F_{bbAA}(i-1) + 0.5M_{bbAR}(i-1)F_{bbAR}(i-1) \\
& + 0.5M_{bbAR}(i-1)F_{bbRR}(i-1) + 0.125M_{bbAR}(i-1)(1-\Phi-\eta)F_{BbAa}(i-1) \\
& + 0.25M_{bbAR}(i-1)\Phi F_{BbAa}(i-1) + 0.25M_{bbAR}(i-1)\eta F_{BbAa}(i-1) + 0.125M_{bbAR}(i-1)F_{BbRa}(i-1) \\
& + 0.25M_{bbAR}(i-1)F_{BbAA}(i-1) + 0.25M_{bbAR}(i-1)F_{BbAR}(i-1) + 0.25M_{bbAR}(i-1)F_{BbRR}(i-1) \\
& + 0.5M_{bbRR}(i-1)F_{bbAa}(i-1) + M_{bbRR}(i-1)F_{bbAA}(i-1) + 0.5M_{bbRR}(i-1)F_{bbAR}(i-1) \\
& + 0.25M_{bbRR}(i-1)(1-\Phi-\eta)F_{BbAa}(i-1) + 0.5M_{bbRR}(i-1)\Phi F_{BbAa}(i-1) \\
& + 0.25M_{bbRR}(i-1)\eta F_{BbAa}(i-1) + 0.5M_{bbRR}(i-1)F_{BbAA}(i-1) + 0.25M_{bbRR}(i-1)F_{BbAR}(i-1) \\
& + 0.125\eta M_{BbAa}(i-1)F_{bbAa}(i-1) + 0.125(1-\Phi-\eta)M_{BbAa}(i-1)F_{bbRa}(i-1) \\
& + 0.25\Phi M_{BbAa}(i-1)F_{bbRa}(i-1) + 0.125\eta M_{BbAa}(i-1)F_{bbRa}(i-1) + 0.25\eta M_{BbAa}(i-1)F_{bbAA}(i-1) \\
& + 0.125(1-\Phi-\eta)M_{BbAa}(i-1)F_{bbAR}(i-1) + 0.25\Phi M_{BbAa}(i-1)F_{bbAR}(i-1) \\
& + 0.25\eta M_{BbAa}(i-1)F_{bbAR}(i-1) + 0.25(1-\Phi-\eta)M_{BbAa}(i-1)F_{bbRR}(i-1) \\
& + 0.5\Phi M_{BbAa}(i-1)F_{bbRR}(i-1) + 0.25\eta M_{BbAa}(i-1)F_{bbRR}(i-1) \\
& + 0.0625\eta M_{BbAa}(i-1)(1-\Phi-\eta)F_{BbAa}(i-1) + 0.0625(1-\Phi-\eta)M_{BbAa}(i-1)\eta F_{BbAa}(i-1) \\
& + 0.125\Phi M_{BbAa}(i-1)\eta F_{BbAa}(i-1) + 0.125\eta M_{BbAa}(i-1)\Phi F_{BbAa}(i-1) \\
& + 0.125\eta M_{BbAa}(i-1)F_{BbAa}(i-1) + 0.0625(1-\Phi-\eta)M_{BbAa}(i-1)F_{BbRa}(i-1) \\
& + 0.125\Phi M_{BbAa}(i-1)F_{BbRa}(i-1) + 0.0625\eta M_{BbAa}(i-1)F_{BbRa}(i-1) + 0.125\eta M_{BbAa}(i-1)F_{BbAA}(i-1) \\
& + 0.0625(1-\Phi-\eta)M_{BbAa}(i-1)F_{BbAR}(i-1) + 0.125\Phi M_{BbAa}(i-1)F_{BbAR}(i-1) \\
& + 0.125\eta M_{BbAa}(i-1)F_{BbAR}(i-1) + 0.125(1-\Phi-\eta)M_{BbAa}(i-1)F_{BbRR}(i-1) \\
& + 0.25\Phi M_{BbAa}(i-1)F_{BbRR}(i-1) + 0.125\eta M_{BbAa}(i-1)F_{BbRR}(i-1) \\
& + 0.0625(1-\Phi-\eta)M_{BbAa}(i-1)\eta F_{BbAA}(i-1) + 0.125M_{BbRa}(i-1)F_{bbAa}(i-1)
\end{aligned}$$

$$\begin{aligned}
& + 0.25M_{BbRa}(i-1)F_{bbAA}(i-1) + 0.125M_{BbRa}(i-1)F_{bbAR}(i-1) \\
& + 0.0625M_{BbRa}(i-1)(1-\Phi-\eta)F_{BbAa}(i-1) + 0.125M_{BbRa}(i-1)\Phi F_{BbAa}(i-1) \\
& + 0.0625M_{BbRa}(i-1)\eta F_{BbAa}(i-1) + 0.125M_{BbRa}(i-1)F_{BbAA}(i-1) + 0.0625M_{BbRa}(i-1)F_{BbAR}(i-1) \\
& + 0.25M_{BbAA}(i-1)F_{bbRa}(i-1) + 0.25M_{BbAA}(i-1)F_{bbAR}(i-1) + 0.5M_{BbAA}(i-1)F_{bbRR}(i-1) \\
& + 0.125M_{BbAA}(i-1)\eta F_{BbAa}(i-1) + 0.125M_{BbAA}(i-1)F_{BbRa}(i-1) + 0.125M_{BbAA}(i-1)F_{BbAR}(i-1) \\
& + 0.25M_{BbAA}(i-1)F_{BbRR}(i-1) + 0.125M_{BbAR}(i-1)F_{bbAa}(i-1) + 0.125M_{BbAR}(i-1)F_{bbRa}(i-1) \\
& + 0.25M_{BbAR}(i-1)F_{bbAA}(i-1) + 0.25M_{BbAR}(i-1)F_{bbAR}(i-1) + 0.25M_{BbAR}(i-1)F_{bbRR}(i-1) \\
& + 0.0625M_{BbAR}(i-1)(1-\Phi-\eta)F_{BbAa}(i-1) + 0.125M_{BbAR}(i-1)\Phi F_{BbAa}(i-1) \\
& + 0.125M_{BbAR}(i-1)\eta F_{BbAa}(i-1) + 0.0625M_{BbAR}(i-1)F_{BbRa}(i-1) + 0.125M_{BbAR}(i-1)F_{BbAA}(i-1) \\
& + 0.125M_{BbAR}(i-1)F_{BbAR}(i-1) + 0.125M_{BbAR}(i-1)F_{BbRR}(i-1) + 0.25M_{BbRR}(i-1)F_{bbAa}(i-1) \\
& + 0.5M_{BbRR}(i-1)F_{bbAA}(i-1) + 0.25M_{BbRR}(i-1)F_{bbAR}(i-1) + 0.125M_{BbRR}(i-1)(1-\Phi-\eta)F_{BbAa}(i-1) \\
& + 0.25M_{BbRR}(i-1)\Phi F_{BbAa}(i-1) + 0.125M_{BbRR}(i-1)\eta F_{BbAa}(i-1) + 0.25M_{BbRR}(i-1)F_{BbAA}(i-1) \\
& + 0.125M_{BbRR}(i-1)F_{BbAR}(i-1)], \\
M_{bbRR}^e &= \left(\frac{\Omega_{bbRR}}{2}\right) [0.25M_{bbRa}(i-1)F_{bbRa}(i-1) + 0.25M_{bbRa}(i-1)F_{bbAR}(i-1) + 0.5M_{bbRa}(i-1)F_{bbRR}(i-1) \\
& + 0.125M_{bbRa}(i-1)\eta F_{BbAa}(i-1) + 0.125M_{bbRa}(i-1)F_{BbRa}(i-1) + 0.125M_{bbRa}(i-1)F_{BbAR}(i-1) \\
& + 0.25M_{bbRa}(i-1)F_{BbRR}(i-1) + 0.25M_{bbAR}(i-1)F_{bbRa}(i-1) + 0.25M_{bbAR}(i-1)F_{bbAR}(i-1) \\
& + 0.5M_{bbAR}(i-1)F_{bbRR}(i-1) + 0.125M_{bbAR}(i-1)\eta F_{BbAa}(i-1) + 0.125M_{bbAR}(i-1)F_{BbRa}(i-1) \\
& + 0.125M_{bbAR}(i-1)F_{BbAR}(i-1) + 0.25M_{bbAR}(i-1)F_{BbRR}(i-1) + 0.5M_{bbRR}(i-1)F_{bbRa}(i-1) \\
& + 0.5M_{bbRR}(i-1)F_{bbAR}(i-1) + M_{bbRR}(i-1)F_{bbRR}(i-1) + 0.25M_{bbRR}(i-1)\eta F_{BbAa}(i-1) \\
& + 0.25M_{bbRR}(i-1)F_{BbRa}(i-1) + 0.25M_{bbRR}(i-1)F_{BbAR}(i-1) + 0.5M_{bbRR}(i-1)F_{BbRR}(i-1) \\
& + 0.125\eta M_{BbAa}(i-1)F_{bbRa}(i-1) + 0.125\eta M_{BbAa}(i-1)F_{bbAR}(i-1) + 0.25\eta M_{BbAa}(i-1)F_{bbRR}(i-1) \\
& + 0.0625\eta M_{BbAa}(i-1)\eta F_{BbAa}(i-1) + 0.0625\eta M_{BbAa}(i-1)F_{BbRa}(i-1) \\
& + 0.0625\eta M_{BbAa}(i-1)F_{BbAR}(i-1) + 0.125\eta M_{BbAa}(i-1)F_{BbRR}(i-1) + 0.125M_{BbRa}(i-1)F_{bbRa}(i-1) \\
& + 0.125M_{BbRa}(i-1)F_{bbAR}(i-1) + 0.25M_{BbRa}(i-1)F_{bbRR}(i-1) + 0.0625M_{BbRa}(i-1)\eta F_{BbAa}(i-1) \\
& + 0.0625M_{BbRa}(i-1)F_{BbRa}(i-1) + 0.0625M_{BbRa}(i-1)F_{BbAR}(i-1) + 0.125M_{BbRa}(i-1)F_{BbRR}(i-1) \\
& + 0.125M_{BbAR}(i-1)F_{bbRa}(i-1) + 0.125M_{BbAR}(i-1)F_{bbAR}(i-1) + 0.25M_{BbAR}(i-1)F_{bbRR}(i-1) \\
& + 0.0625M_{BbAR}(i-1)\eta F_{BbAa}(i-1) + 0.0625M_{BbAR}(i-1)F_{BbRa}(i-1) + 0.0625M_{BbAR}(i-1)F_{BbAR}(i-1) \\
& + 0.125M_{BbAR}(i-1)F_{BbRR}(i-1) + 0.25M_{BbRR}(i-1)F_{bbRa}(i-1) + 0.25M_{BbRR}(i-1)F_{bbAR}(i-1) \\
& + 0.5M_{BbRR}(i-1)F_{bbRR}(i-1) + 0.125M_{BbRR}(i-1)\eta F_{BbAa}(i-1) + 0.125M_{BbRR}(i-1)F_{BbRa}(i-1) \\
& + 0.125M_{BbRR}(i-1)F_{BbAR}(i-1) + 0.25M_{BbRR}(i-1)F_{BbRR}(i-1)], \\
M_{Bbaa}^e &= \left(\frac{\Omega_{Bbaa}}{2}\right) [0.5M_{bbaa}(i-1)F_{Bbaa}(i-1) + 0.25M_{bbaa}(i-1)(1-\Phi-\eta)F_{BbAa}(i-1) \\
& + 0.25M_{bbaa}(i-1)F_{BbRa}(i-1) + M_{bbaa}(i-1)F_{BBaa}(i-1) + 0.5M_{bbaa}(i-1)(1-\Phi-\eta)F_{BBaa}(i-1) \\
& + 0.5M_{bbaa}(i-1)F_{BBRa}(i-1) + 0.25M_{bbAa}(i-1)F_{Bbaa}(i-1) + 0.125M_{bbAa}(i-1)(1-\Phi-\eta)F_{BBaa}(i-1) \\
& + 0.125M_{bbAa}(i-1)F_{BbRa}(i-1) + 0.5M_{bbAa}(i-1)F_{Bbaa}(i-1) + 0.25M_{bbAa}(i-1)(1-\Phi-\eta)F_{BBaa}(i-1) \\
& + 0.25M_{bbAa}(i-1)F_{BBRa}(i-1) + 0.25M_{bbRa}(i-1)F_{Bbaa}(i-1) + 0.125M_{bbRa}(i-1)(1-\Phi-\eta)F_{BbAa}(i-1) \\
& + 0.125M_{bbRa}(i-1)F_{BbRa}(i-1) + 0.5M_{bbRa}(i-1)F_{BBaa}(i-1) + 0.25M_{bbRa}(i-1)(1-\Phi-\eta)F_{BBaa}(i-1) \\
& + 0.25M_{bbRa}(i-1)F_{BBRa}(i-1) + 0.5M_{Bbaa}(i-1)F_{bbAa}(i-1) + 0.25M_{Bbaa}(i-1)(1-\Phi-\eta)F_{BbAa}(i-1) \\
& + 0.25M_{Bbaa}(i-1)F_{BbRa}(i-1) + 0.5M_{Bbaa}(i-1)F_{Bbaa}(i-1) + 0.25M_{Bbaa}(i-1)(1-\Phi-\eta)F_{BBaa}(i-1) \\
& + 0.25M_{Bbaa}(i-1)F_{BBRa}(i-1) + 0.25(1-\Phi-\eta)M_{BbAa}(i-1)F_{bbAa}(i-1) \\
& + 0.125(1-\Phi-\eta)M_{BbAa}(i-1)F_{bbAa}(i-1) + 0.125(1-\Phi-\eta)M_{BbAa}(i-1)F_{bbRa}(i-1) \\
& + 0.25(1-\Phi-\eta)M_{BbAa}(i-1)F_{Bbaa}(i-1) + 0.125(1-\Phi-\eta)M_{BbAa}(i-1)(1-\Phi-\eta)F_{BbAa}(i-1) \\
& + 0.125(1-\Phi-\eta)M_{BbAa}(i-1)F_{BbRa}(i-1) + 0.25(1-\Phi-\eta)M_{BbAa}(i-1)F_{BBaa}(i-1) \\
& + 0.125(1-\Phi-\eta)M_{BbAa}(i-1)(1-\Phi-\eta)F_{BBaa}(i-1) + 0.125(1-\Phi-\eta)M_{BbAa}(i-1)F_{BBRa}(i-1) \\
& + 0.25M_{BbRa}(i-1)F_{bbAa}(i-1) + 0.125M_{BbRa}(i-1)F_{bbAa}(i-1) + 0.125M_{BbRa}(i-1)F_{bbRa}(i-1)
\end{aligned}$$

$$\begin{aligned}
& + 0.25M_{BbRa}(i-1)F_{Bbaa}(i-1) + 0.125M_{BbRa}(i-1)(1-\Phi-\eta)F_{BbAa}(i-1) \\
& + 0.125M_{BbRa}(i-1)F_{BbRa}(i-1) + 0.25M_{BbRa}(i-1)F_{BBaa}(i-1) \\
& + 0.125M_{BbRa}(i-1)(1-\Phi-\eta)F_{BBAA}(i-1) + 0.125M_{BbRa}(i-1)F_{BBRa}(i-1) + M_{BBaa}(i-1)F_{bbaa}(i-1) \\
& + 0.5M_{BBaa}(i-1)F_{bbAa}(i-1) + 0.5M_{BBaa}(i-1)F_{bbRa}(i-1) + 0.5M_{BBaa}(i-1)F_{Bbaa}(i-1) \\
& + 0.25M_{BBaa}(i-1)(1-\Phi-\eta)F_{BbAa}(i-1) + 0.25M_{BBaa}(i-1)F_{BbRa}(i-1) \\
& + 0.5(1-\Phi-\eta)M_{BBAA}(i-1)F_{bbaa}(i-1) + 0.25(1-\Phi-\eta)M_{BBAA}(i-1)F_{bbAa}(i-1) \\
& + 0.25(1-\Phi-\eta)M_{BBAA}(i-1)F_{bbRa}(i-1) + 0.25(1-\Phi-\eta)M_{BBAA}(i-1)F_{Bbaa}(i-1) \\
& + 0.125(1-\Phi-\eta)M_{BBAA}(i-1)(1-\Phi-\eta)F_{BbAa}(i-1) + 0.125(1-\Phi-\eta)M_{BBAA}(i-1)F_{BbRa}(i-1) \\
& + 0.5M_{BBRa}(i-1)F_{bbaa}(i-1) + 0.25M_{BBRa}(i-1)F_{bbAa}(i-1) + 0.25M_{BBRa}(i-1)F_{bbRa}(i-1) \\
& + 0.25M_{BBRa}(i-1)F_{Bbaa}(i-1) + 0.125M_{BBRa}(i-1)(1-\Phi-\eta)F_{BbAa}(i-1) \\
& + 0.125M_{BBRa}(i-1)F_{BbRa}(i-1)], \\
M_{BbAa}^e & = \left(\frac{\Omega_{BbAa}}{2}\right) [0.25M_{bbaa}(i-1)(1-\Phi-\eta)F_{BbAa}(i-1) + 0.5M_{bbaa}(i-1)\Phi F_{BbAa}(i-1) \\
& + 0.25M_{bbaa}(i-1)\eta F_{BbAa}(i-1) + 0.5M_{bbaa}(i-1)F_{BbAA}(i-1) + 0.25M_{bbaa}(i-1)F_{BbAR}(i-1) \\
& + 0.5M_{bbaa}(i-1)(1-\Phi-\eta)F_{BBAA}(i-1) + M_{bbaa}(i-1)\Phi F_{BBAA}(i-1) + 0.5M_{bbaa}(i-1)\eta F_{BBAA}(i-1) \\
& + M_{bbaa}(i-1)F_{BBAA}(i-1) + 0.5M_{bbaa}(i-1)F_{BBAR}(i-1) + 0.25M_{bbAa}(i-1)F_{Bbaa}(i-1) \\
& + 0.25M_{bbAa}(i-1)(1-\Phi-\eta)F_{BbAa}(i-1) + 0.25M_{bbAa}(i-1)\Phi F_{BbAa}(i-1) \\
& + 0.125M_{bbAa}(i-1)\eta F_{BbAa}(i-1) + 0.125M_{bbAa}(i-1)F_{BbRa}(i-1) + 0.25M_{bbAa}(i-1)F_{BbAA}(i-1) \\
& + 0.125M_{bbAa}(i-1)F_{BbAR}(i-1) + 0.5M_{bbAa}(i-1)F_{BBaa}(i-1) + 0.5M_{bbAa}(i-1)(1-\Phi-\eta)F_{BBAA}(i-1) \\
& + 0.5M_{bbAa}(i-1)\Phi F_{BBAA}(i-1) + 0.25M_{bbAa}(i-1)\eta F_{BBAA}(i-1) + 0.25M_{bbAa}(i-1)F_{BBRa}(i-1) \\
& + 0.5M_{bbAa}(i-1)F_{BBAA}(i-1) + 0.25M_{bbAa}(i-1)F_{BBAR}(i-1) \\
& + 0.125M_{bbRa}(i-1)(1-\Phi-\eta)F_{BbAa}(i-1) + 0.25M_{bbRa}(i-1)\Phi F_{BbAa}(i-1) \\
& + 0.125M_{bbRa}(i-1)\eta F_{BbAa}(i-1) + 0.25M_{bbRa}(i-1)F_{BbAA}(i-1) + 0.125M_{bbRa}(i-1)F_{BbAR}(i-1) \\
& + 0.25M_{bbRa}(i-1)(1-\Phi-\eta)F_{BBAA}(i-1) + 0.5M_{bbRa}(i-1)\Phi F_{BBAA}(i-1) \\
& + 0.25M_{bbRa}(i-1)\eta F_{BBAA}(i-1) + 0.5M_{bbRa}(i-1)F_{BBAA}(i-1) + 0.25M_{bbRa}(i-1)F_{BBAR}(i-1) \\
& + 0.5M_{bbAA}(i-1)F_{Bbaa}(i-1) + 0.25M_{bbAA}(i-1)(1-\Phi-\eta)F_{BbAa}(i-1) + 0.25M_{bbAA}(i-1)F_{BbRa}(i-1) \\
& + M_{bbAA}(i-1)F_{Bbaa}(i-1) + 0.5M_{bbAA}(i-1)(1-\Phi-\eta)F_{BBAA}(i-1) + 0.5M_{bbAA}(i-1)F_{BBRa}(i-1) \\
& + 0.25M_{bbAR}(i-1)F_{Bbaa}(i-1) + 0.125M_{bbAR}(i-1)(1-\Phi-\eta)F_{BbAa}(i-1) \\
& + 0.125M_{bbAR}(i-1)F_{BbRa}(i-1) + 0.5M_{bbAR}(i-1)F_{BBaa}(i-1) + 0.25M_{bbAR}(i-1)(1-\Phi-\eta)F_{BBAA}(i-1) \\
& + 0.25M_{bbAR}(i-1)F_{BBRa}(i-1) + 0.25M_{Bbaa}(i-1)F_{bbAa}(i-1) + 0.5M_{Bbaa}(i-1)F_{bbAA}(i-1) \\
& + 0.25M_{Bbaa}(i-1)F_{bbAR}(i-1) + 0.25M_{Bbaa}(i-1)(1-\Phi-\eta)F_{BbAa}(i-1) + 0.5M_{Bbaa}(i-1)\Phi F_{BbAa}(i-1) \\
& + 0.25M_{Bbaa}(i-1)\eta F_{BbAa}(i-1) + 0.5M_{Bbaa}(i-1)F_{BbAA}(i-1) + 0.25M_{Bbaa}(i-1)F_{BbAR}(i-1) \\
& + 0.25M_{Bbaa}(i-1)(1-\Phi-\eta)F_{BBAA}(i-1) + 0.5M_{Bbaa}(i-1)\Phi F_{BBAA}(i-1) \\
& + 0.25M_{Bbaa}(i-1)\eta F_{BBAA}(i-1) + 0.5M_{Bbaa}(i-1)F_{BBAA}(i-1) + 0.25M_{Bbaa}(i-1)F_{BBAR}(i-1) \\
& + 0.25(1-\Phi-\eta)M_{BbAa}(i-1)F_{bbaa}(i-1) + 0.5\Phi M_{BbAa}(i-1)F_{bbaa}(i-1) + 0.25\eta M_{BbAa}(i-1)F_{bbaa}(i-1) \\
& + 0.25(1-\Phi-\eta)M_{BbAa}(i-1)F_{bbAa}(i-1) + 0.25\Phi M_{BbAa}(i-1)F_{bbAa}(i-1) \\
& + 0.125\eta M_{BbAa}(i-1)F_{bbAa}(i-1) + 0.125(1-\Phi-\eta)M_{BbAa}(i-1)F_{bbRa}(i-1) \\
& + 0.25\Phi M_{BbAa}(i-1)F_{bbRa}(i-1) + 0.125\eta M_{BbAa}(i-1)F_{bbRa}(i-1) \\
& + 0.25(1-\Phi-\eta)M_{BbAa}(i-1)F_{bbAA}(i-1) + 0.125(1-\Phi-\eta)M_{BbAa}(i-1)F_{bbAR}(i-1) \\
& + 0.25(1-\Phi-\eta)M_{BbAa}(i-1)F_{Bbaa}(i-1) + 0.5\Phi M_{BbAa}(i-1)F_{Bbaa}(i-1) + 0.25\eta M_{BbAa}(i-1)F_{Bbaa}(i-1) \\
& + 0.25(1-\Phi-\eta)M_{BbAa}(i-1)(1-\Phi-\eta)F_{BbAa}(i-1) + 0.25\Phi M_{BbAa}(i-1)(1-\Phi-\eta)F_{BbAa}(i-1) \\
& + 0.125\eta M_{BbAa}(i-1)(1-\Phi-\eta)F_{BbAa}(i-1) + 0.25(1-\Phi-\eta)M_{BbAa}(i-1)\Phi F_{BbAa}(i-1) \\
& + 0.125(1-\Phi-\eta)M_{BbAa}(i-1)\eta F_{BbAa}(i-1) + 0.125(1-\Phi-\eta)M_{BbAa}(i-1)F_{BbRa}(i-1) \\
& + 0.25\Phi M_{BbAa}(i-1)F_{BbRa}(i-1) + 0.125\eta M_{BbAa}(i-1)F_{BbRa}(i-1) + 0.25(1-\Phi-\eta)M_{BbAa}(i-1)F_{BbAA}(i-1) \\
& + 0.125(1-\Phi-\eta)M_{BbAa}(i-1)F_{BbAR}(i-1) + 0.25(1-\Phi-\eta)M_{BbAa}(i-1)F_{BBaa}(i-1) \\
& + 0.5\Phi M_{BbAa}(i-1)F_{BBaa}(i-1) + 0.25\eta M_{BbAa}(i-1)F_{BBaa}(i-1) \\
& + 0.25(1-\Phi-\eta)M_{BbAa}(i-1)(1-\Phi-\eta)F_{BBAA}(i-1) + 0.25\Phi M_{BbAa}(i-1)(1-\Phi-\eta)F_{BBAA}(i-1)
\end{aligned}$$

$$\begin{aligned}
& + 0.125\eta M_{BbAa}(i-1)(1-\Phi-\eta)F_{BBAA}(i-1) + 0.25(1-\Phi-\eta)M_{BbAa}(i-1)\Phi F_{BBAA}(i-1) \\
& + 0.125(1-\Phi-\eta)M_{BbAa}(i-1)\eta F_{BBAA}(i-1) + 0.125(1-\Phi-\eta)M_{BbAa}(i-1)F_{BBRa}(i-1) \\
& + 0.25\Phi M_{BbAa}(i-1)F_{BBRa}(i-1) + 0.125\eta M_{BbAa}(i-1)F_{BBRa}(i-1) \\
& + 0.25(1-\Phi-\eta)M_{BbAa}(i-1)F_{BBAA}(i-1) + 0.125(1-\Phi-\eta)M_{BbAa}(i-1)F_{BBAR}(i-1) \\
& + 0.125M_{BbRa}(i-1)F_{bbAa}(i-1) + 0.25M_{BbRa}(i-1)F_{bbAA}(i-1) + 0.125M_{BbRa}(i-1)F_{bbAR}(i-1) \\
& + 0.125M_{BbRa}(i-1)(1-\Phi-\eta)F_{BbAa}(i-1) + 0.25M_{BbRa}(i-1)\Phi F_{BbAa}(i-1) \\
& + 0.125M_{BbRa}(i-1)\eta F_{BbAa}(i-1) + 0.25M_{BbRa}(i-1)F_{BBAA}(i-1) + 0.125M_{BbRa}(i-1)F_{BBAR}(i-1) \\
& + 0.125M_{BbRa}(i-1)(1-\Phi-\eta)F_{BBAA}(i-1) + 0.25M_{BbRa}(i-1)\Phi F_{BBAA}(i-1) \\
& + 0.125M_{BbRa}(i-1)\eta F_{BBAA}(i-1) + 0.25M_{BbRa}(i-1)F_{BBAA}(i-1) + 0.125M_{BbRa}(i-1)F_{BBAR}(i-1) \\
& + 0.5M_{BBAA}(i-1)F_{bbAa}(i-1) + 0.25M_{BBAA}(i-1)F_{bbAa}(i-1) + 0.25M_{BBAA}(i-1)F_{bbRa}(i-1) \\
& + 0.5M_{BBAA}(i-1)F_{BBaa}(i-1) + 0.25M_{BBAA}(i-1)(1-\Phi-\eta)F_{BbAa}(i-1) + 0.25M_{BBAA}(i-1)F_{BbRa}(i-1) \\
& + 0.5M_{BBAA}(i-1)F_{BBaa}(i-1) + 0.25M_{BBAA}(i-1)(1-\Phi-\eta)F_{BBAA}(i-1) \\
& + 0.25M_{BBAA}(i-1)F_{BBRa}(i-1) + 0.25M_{BBAR}(i-1)F_{bbAa}(i-1) + 0.125M_{BBAR}(i-1)F_{bbAa}(i-1) \\
& + 0.125M_{BBAR}(i-1)F_{bbRa}(i-1) + 0.25M_{BBAR}(i-1)F_{BBaa}(i-1) \\
& + 0.125M_{BBAR}(i-1)(1-\Phi-\eta)F_{BbAa}(i-1) + 0.125M_{BBAR}(i-1)F_{BbRa}(i-1) \\
& + 0.25M_{BBAR}(i-1)F_{BBaa}(i-1) + 0.125M_{BBAR}(i-1)(1-\Phi-\eta)F_{BBAA}(i-1) \\
& + 0.125M_{BBAR}(i-1)F_{BBRa}(i-1) + 0.5M_{BBaa}(i-1)F_{bbAa}(i-1) + M_{BBaa}(i-1)F_{bbAA}(i-1) \\
& + 0.5M_{BBaa}(i-1)F_{bbAR}(i-1) + 0.25M_{BBaa}(i-1)(1-\Phi-\eta)F_{BbAa}(i-1) + 0.5M_{BBaa}(i-1)\Phi F_{BbAa}(i-1) \\
& + 0.25M_{BBaa}(i-1)\eta F_{BbAa}(i-1) + 0.5M_{BBaa}(i-1)F_{BBAA}(i-1) + 0.25M_{BBaa}(i-1)F_{BBAR}(i-1) \\
& + 0.5(1-\Phi-\eta)M_{BBAA}(i-1)F_{bbAa}(i-1) + \Phi M_{BBAA}(i-1)F_{bbAa}(i-1) + 0.5\eta M_{BBAA}(i-1)F_{bbAa}(i-1) \\
& + 0.5(1-\Phi-\eta)M_{BBAA}(i-1)F_{bbAa}(i-1) + 0.5\Phi M_{BBAA}(i-1)F_{bbAa}(i-1) \\
& + 0.25\eta M_{BBAA}(i-1)F_{bbAa}(i-1) + 0.25(1-\Phi-\eta)M_{BBAA}(i-1)F_{bbRa}(i-1) \\
& + 0.5\Phi M_{BBAA}(i-1)F_{bbRa}(i-1) + 0.25\eta M_{BBAA}(i-1)F_{bbRa}(i-1) \\
& + 0.5(1-\Phi-\eta)M_{BBAA}(i-1)F_{bbAA}(i-1) + 0.25(1-\Phi-\eta)M_{BBAA}(i-1)F_{bbAR}(i-1) \\
& + 0.25(1-\Phi-\eta)M_{BBAA}(i-1)F_{BBaa}(i-1) + 0.5\Phi M_{BBAA}(i-1)F_{BBaa}(i-1) \\
& + 0.25\eta M_{BBAA}(i-1)F_{BBaa}(i-1) + 0.25(1-\Phi-\eta)M_{BBAA}(i-1)(1-\Phi-\eta)F_{BbAa}(i-1) \\
& + 0.25\Phi M_{BBAA}(i-1)(1-\Phi-\eta)F_{BbAa}(i-1) + 0.125\eta M_{BBAA}(i-1)(1-\Phi-\eta)F_{BbAa}(i-1) \\
& + 0.25(1-\Phi-\eta)M_{BBAA}(i-1)\Phi F_{BbAa}(i-1) + 0.125(1-\Phi-\eta)M_{BBAA}(i-1)\eta F_{BbAa}(i-1) \\
& + 0.125(1-\Phi-\eta)M_{BBAA}(i-1)F_{BbRa}(i-1) + 0.25\Phi M_{BBAA}(i-1)F_{BbRa}(i-1) \\
& + 0.125\eta M_{BBAA}(i-1)F_{BbRa}(i-1) + 0.25(1-\Phi-\eta)M_{BBAA}(i-1)F_{BBAA}(i-1) \\
& + 0.125(1-\Phi-\eta)M_{BBAA}(i-1)F_{BBAR}(i-1) + 0.25M_{BBRa}(i-1)F_{bbAa}(i-1) \\
& + 0.5M_{BBRa}(i-1)F_{bbAA}(i-1) + 0.25M_{BBRa}(i-1)F_{bbAR}(i-1) \\
& + 0.125M_{BBRa}(i-1)(1-\Phi-\eta)F_{BbAa}(i-1) + 0.25M_{BBRa}(i-1)\Phi F_{BbAa}(i-1) \\
& + 0.125M_{BBRa}(i-1)\eta F_{BbAa}(i-1) + 0.25M_{BBRa}(i-1)F_{BBAA}(i-1) + 0.125M_{BBRa}(i-1)F_{BBAR}(i-1) \\
& + M_{BBAA}(i-1)F_{bbAa}(i-1) + 0.5M_{BBAA}(i-1)F_{bbAa}(i-1) + 0.5M_{BBAA}(i-1)F_{bbRa}(i-1) \\
& + 0.5M_{BBAA}(i-1)F_{BBaa}(i-1) + 0.25M_{BBAA}(i-1)(1-\Phi-\eta)F_{BbAa}(i-1) \\
& + 0.25M_{BBAA}(i-1)F_{BbRa}(i-1) + 0.5M_{BBAR}(i-1)F_{bbAa}(i-1) + 0.25M_{BBAR}(i-1)F_{bbAa}(i-1) \\
& + 0.25M_{BBAR}(i-1)F_{bbRa}(i-1) + 0.25M_{BBAR}(i-1)F_{BBaa}(i-1) \\
& + 0.125M_{BBAR}(i-1)(1-\Phi-\eta)F_{BbAa}(i-1) + 0.125M_{BBAR}(i-1)F_{BbRa}(i-1)], \\
M_{BbRa}^e & = (\Omega_{BbRa}/2)[0.25M_{bbAa}(i-1)\eta F_{BbAa}(i-1) + 0.25M_{bbAa}(i-1)F_{BbRa}(i-1) + 0.25M_{bbAa}(i-1)F_{BbAR}(i-1) \\
& + 0.5M_{bbAa}(i-1)F_{BbRR}(i-1) + 0.5M_{bbAa}(i-1)\eta F_{BBAA}(i-1) + 0.5M_{bbAa}(i-1)F_{BBRa}(i-1) \\
& + 0.5M_{bbAa}(i-1)F_{BBAR}(i-1) + M_{bbAa}(i-1)F_{BBRR}(i-1) + 0.125M_{bbAa}(i-1)\eta F_{BbAa}(i-1) \\
& + 0.125M_{bbAa}(i-1)F_{BbRa}(i-1) + 0.125M_{bbAa}(i-1)F_{BbAR}(i-1) + 0.25M_{bbAa}(i-1)F_{BbRR}(i-1) \\
& + 0.25M_{bbAa}(i-1)\eta F_{BBAA}(i-1) + 0.25M_{bbAa}(i-1)F_{BBRa}(i-1) + 0.25M_{bbAa}(i-1)F_{BBAR}(i-1) \\
& + 0.5M_{bbAa}(i-1)F_{BBRR}(i-1) + 0.25M_{bbRa}(i-1)F_{BBaa}(i-1) + 0.125M_{bbRa}(i-1)(1-\Phi-\eta)F_{BbAa}(i-1) \\
& + 0.125M_{bbRa}(i-1)\eta F_{BbAa}(i-1) + 0.25M_{bbRa}(i-1)F_{BbRa}(i-1) + 0.125M_{bbRa}(i-1)F_{BbAR}(i-1) \\
& + 0.25M_{bbRa}(i-1)F_{BbRR}(i-1) + 0.5M_{bbRa}(i-1)F_{BBaa}(i-1) + 0.25M_{bbRa}(i-1)(1-\Phi-\eta)F_{BBAA}(i-1)
\end{aligned}$$

$$\begin{aligned}
& + 0.25M_{bbRa}(i-1)\eta F_{BBaA}(i-1) + 0.5M_{bbRa}(i-1)F_{BBRa}(i-1) + 0.25M_{bbRa}(i-1)F_{BBAR}(i-1) \\
& + 0.5M_{bbRa}(i-1)F_{BBRR}(i-1) + 0.25M_{bbAR}(i-1)F_{Bbaa}(i-1) + 0.125M_{bbAR}(i-1)(1-\Phi-\eta)F_{BbAa}(i-1) \\
& + 0.125M_{bbAR}(i-1)F_{BbRa}(i-1) + 0.5M_{bbAR}(i-1)F_{BBaa}(i-1) + 0.25M_{bbAR}(i-1)(1-\Phi-\eta)F_{BBaA}(i-1) \\
& + 0.25M_{bbAR}(i-1)F_{BBRa}(i-1) + 0.5M_{bbRR}(i-1)F_{Bbaa}(i-1) + 0.25M_{bbRR}(i-1)(1-\Phi-\eta)F_{BbAa}(i-1) \\
& + 0.25M_{bbRR}(i-1)F_{BbRa}(i-1) + M_{bbRR}(i-1)F_{BBaa}(i-1) + 0.5M_{bbRR}(i-1)(1-\Phi-\eta)F_{BBaA}(i-1) \\
& + 0.5M_{bbRR}(i-1)F_{BBRa}(i-1) + 0.25M_{Bbaa}(i-1)F_{bbRa}(i-1) + 0.25M_{Bbaa}(i-1)F_{bbAR}(i-1) \\
& + 0.5M_{Bbaa}(i-1)F_{bbRR}(i-1) + 0.25M_{Bbaa}(i-1)\eta F_{BbAa}(i-1) + 0.25M_{Bbaa}(i-1)F_{BbRa}(i-1) \\
& + 0.25M_{Bbaa}(i-1)F_{BbAR}(i-1) + 0.5M_{Bbaa}(i-1)F_{BbRR}(i-1) + 0.25M_{Bbaa}(i-1)\eta F_{BBaA}(i-1) \\
& + 0.25M_{Bbaa}(i-1)F_{BBRa}(i-1) + 0.25M_{Bbaa}(i-1)F_{BBAR}(i-1) + 0.5M_{Bbaa}(i-1)F_{BBRR}(i-1) \\
& + 0.25\eta M_{BbAa}(i-1)F_{bbAa}(i-1) + 0.125\eta M_{BbAa}(i-1)F_{bbAa}(i-1) \\
& + 0.125(1-\Phi-\eta)M_{BbAa}(i-1)F_{bbRa}(i-1) + 0.125\eta M_{BbAa}(i-1)F_{bbRa}(i-1) \\
& + 0.125(1-\Phi-\eta)M_{BbAa}(i-1)F_{bbAR}(i-1) + 0.25(1-\Phi-\eta)M_{BbAa}(i-1)F_{bbRR}(i-1) \\
& + 0.25\eta M_{BbAa}(i-1)F_{Bbaa}(i-1) + 0.125\eta M_{BbAa}(i-1)(1-\Phi-\eta)F_{BbAa}(i-1) \\
& + 0.125(1-\Phi-\eta)M_{BbAa}(i-1)\eta F_{BbAa}(i-1) + 0.125(1-\Phi-\eta)M_{BbAa}(i-1)F_{BbRa}(i-1) \\
& + 0.125\eta M_{BbAa}(i-1)F_{BbRa}(i-1) + 0.125(1-\Phi-\eta)M_{BbAa}(i-1)F_{BbAR}(i-1) \\
& + 0.25(1-\Phi-\eta)M_{BbAa}(i-1)F_{bbRR}(i-1) + 0.25\eta M_{BbAa}(i-1)F_{BBaa}(i-1) \\
& + 0.125\eta M_{BbAa}(i-1)(1-\Phi-\eta)F_{BBaA}(i-1) + 0.125(1-\Phi-\eta)M_{BbAa}(i-1)\eta F_{BBaA}(i-1) \\
& + 0.125(1-\Phi-\eta)M_{BbAa}(i-1)F_{BBRa}(i-1) + 0.125\eta M_{BbAa}(i-1)F_{BBRa}(i-1) \\
& + 0.125(1-\Phi-\eta)M_{BbAa}(i-1)F_{BBAR}(i-1) + 0.25(1-\Phi-\eta)M_{BbAa}(i-1)F_{BBRR}(i-1) \\
& + 0.25M_{BbRa}(i-1)F_{bbAa}(i-1) + 0.125M_{BbRa}(i-1)F_{bbAa}(i-1) + 0.25M_{BbRa}(i-1)F_{bbRa}(i-1) \\
& + 0.125M_{BbRa}(i-1)F_{bbAR}(i-1) + 0.25M_{BbRa}(i-1)F_{bbRR}(i-1) + 0.25M_{BbRa}(i-1)F_{Bbaa}(i-1) \\
& + 0.125M_{BbRa}(i-1)(1-\Phi-\eta)F_{BbAa}(i-1) + 0.125M_{BbRa}(i-1)\eta F_{BbAa}(i-1) \\
& + 0.25M_{BbRa}(i-1)F_{BbRa}(i-1) + 0.125M_{BbRa}(i-1)F_{BbAR}(i-1) + 0.25M_{BbRa}(i-1)F_{BbRR}(i-1) \\
& + 0.25M_{BbRa}(i-1)F_{BBaa}(i-1) + 0.125M_{BbRa}(i-1)(1-\Phi-\eta)F_{BBaA}(i-1) \\
& + 0.125M_{BbRa}(i-1)\eta F_{BBaA}(i-1) + 0.25M_{BbRa}(i-1)F_{BBRa}(i-1) + 0.125M_{BbRa}(i-1)F_{BBAR}(i-1) \\
& + 0.25M_{BbRa}(i-1)F_{BBRR}(i-1) + 0.25M_{BbAR}(i-1)F_{bbAa}(i-1) + 0.125M_{BbAR}(i-1)F_{bbAa}(i-1) \\
& + 0.125M_{BbAR}(i-1)F_{bbRa}(i-1) + 0.25M_{BbAR}(i-1)F_{Bbaa}(i-1) \\
& + 0.125M_{BbAR}(i-1)(1-\Phi-\eta)F_{BbAa}(i-1) + 0.125M_{BbAR}(i-1)F_{BbRa}(i-1) \\
& + 0.25M_{BbAR}(i-1)F_{BBaa}(i-1) + 0.125M_{BbAR}(i-1)(1-\Phi-\eta)F_{BBaA}(i-1) \\
& + 0.125M_{BbAR}(i-1)F_{BBRa}(i-1) + 0.5M_{BbRR}(i-1)F_{bbAa}(i-1) + 0.25M_{BbRR}(i-1)F_{bbAa}(i-1) \\
& + 0.25M_{BbRR}(i-1)F_{bbRa}(i-1) + 0.5M_{BbRR}(i-1)F_{Bbaa}(i-1) + 0.25M_{BbRR}(i-1)(1-\Phi-\eta)F_{BbAa}(i-1) \\
& + 0.25M_{BbRR}(i-1)F_{BbRa}(i-1) + 0.5M_{BbRR}(i-1)F_{BBaa}(i-1) + 0.25M_{BbRR}(i-1)(1-\Phi-\eta)F_{BBaA}(i-1) \\
& + 0.25M_{BbRR}(i-1)F_{BBRa}(i-1) + 0.5M_{BBaa}(i-1)F_{bbRa}(i-1) + 0.5M_{BBaa}(i-1)F_{bbAR}(i-1) \\
& + M_{BBaa}(i-1)F_{bbRR}(i-1) + 0.25M_{BBaa}(i-1)\eta F_{BbAa}(i-1) + 0.25M_{BBaa}(i-1)F_{BbRa}(i-1) \\
& + 0.25M_{BBaa}(i-1)F_{BbAR}(i-1) + 0.5M_{BBaa}(i-1)F_{BbRR}(i-1) + 0.5\eta M_{BBaa}(i-1)F_{bbAa}(i-1) \\
& + 0.25\eta M_{BBaa}(i-1)F_{bbAa}(i-1) + 0.25(1-\Phi-\eta)M_{BBaa}(i-1)F_{bbRa}(i-1) \\
& + 0.25\eta M_{BBaa}(i-1)F_{bbRa}(i-1) + 0.25(1-\Phi-\eta)M_{BBaa}(i-1)F_{bbAR}(i-1) \\
& + 0.5(1-\Phi-\eta)M_{BBaa}(i-1)F_{bbRR}(i-1) + 0.25\eta M_{BBaa}(i-1)F_{Bbaa}(i-1) \\
& + 0.125\eta M_{BBaa}(i-1)(1-\Phi-\eta)F_{BbAa}(i-1) + 0.125(1-\Phi-\eta)M_{BBaa}(i-1)\eta F_{BbAa}(i-1) \\
& + 0.125(1-\Phi-\eta)M_{BBaa}(i-1)F_{BbRa}(i-1) + 0.125\eta M_{BBaa}(i-1)F_{BbRa}(i-1) \\
& + 0.125(1-\Phi-\eta)M_{BBaa}(i-1)F_{BbAR}(i-1) + 0.25(1-\Phi-\eta)M_{BBaa}(i-1)F_{BbRR}(i-1) \\
& + 0.5M_{BBRa}(i-1)F_{bbAa}(i-1) + 0.25M_{BBRa}(i-1)F_{bbAa}(i-1) + 0.5M_{BBRa}(i-1)F_{bbRa}(i-1) \\
& + 0.25M_{BBRa}(i-1)F_{bbAR}(i-1) + 0.5M_{BBRa}(i-1)F_{bbRR}(i-1) + 0.25M_{BBRa}(i-1)F_{Bbaa}(i-1) \\
& + 0.125M_{BBRa}(i-1)(1-\Phi-\eta)F_{BbAa}(i-1) + 0.125M_{BBRa}(i-1)\eta F_{BbAa}(i-1) \\
& + 0.25M_{BBRa}(i-1)F_{BbRa}(i-1) + 0.125M_{BBRa}(i-1)F_{BbAR}(i-1) + 0.25M_{BBRa}(i-1)F_{BbRR}(i-1) \\
& + 0.5M_{BBAR}(i-1)F_{bbAa}(i-1) + 0.25M_{BBAR}(i-1)F_{bbAa}(i-1) + 0.25M_{BBAR}(i-1)F_{bbRa}(i-1) \\
& + 0.25M_{BBAR}(i-1)F_{Bbaa}(i-1) + 0.125M_{BBAR}(i-1)(1-\Phi-\eta)F_{BbAa}(i-1)
\end{aligned}$$



$$\begin{aligned}
& + 0.125M_{BBAR}(i-1)F_{BbRa}(i-1) + M_{BBRR}(i-1)F_{bbaa}(i-1) + 0.5M_{BBRR}(i-1)F_{bbAa}(i-1) \\
& + 0.5M_{BBRR}(i-1)F_{bbRa}(i-1) + 0.5M_{BBRR}(i-1)F_{Bbaa}(i-1) \\
& + 0.25M_{BBRR}(i-1)(1-\Phi-\eta)F_{BbAa}(i-1) + 0.25M_{BBRR}(i-1)F_{BbRa}(i-1)], \\
M_{BbAA}^e = & \left( \frac{\Omega_{BbAA}}{2} \right) [0.125M_{bbAa}(i-1)(1-\Phi-\eta)F_{BbAa}(i-1) + 0.25M_{bbAa}(i-1)\Phi F_{BbAa}(i-1) \\
& + 0.125M_{bbAa}(i-1)\eta F_{BbAa}(i-1) + 0.25M_{bbAa}(i-1)F_{BbAA}(i-1) + 0.125M_{bbAa}(i-1)F_{BbAR}(i-1) \\
& + 0.25M_{bbAa}(i-1)(1-\Phi-\eta)F_{BBAa}(i-1) + 0.5M_{bbAa}(i-1)\Phi F_{BBAa}(i-1) \\
& + 0.25M_{bbAa}(i-1)\eta F_{BBAa}(i-1) + 0.5M_{bbAa}(i-1)F_{BBAa}(i-1) + 0.25M_{bbAa}(i-1)F_{BBAR}(i-1) \\
& + 0.25M_{bbAA}(i-1)(1-\Phi-\eta)F_{BbAa}(i-1) + 0.5M_{bbAA}(i-1)\Phi F_{BbAa}(i-1) \\
& + 0.25M_{bbAA}(i-1)\eta F_{BbAa}(i-1) + 0.5M_{bbAA}(i-1)F_{BbAA}(i-1) + 0.25M_{bbAA}(i-1)F_{BbAR}(i-1) \\
& + 0.5M_{bbAA}(i-1)(1-\Phi-\eta)F_{BBAa}(i-1) + M_{bbAA}(i-1)\Phi F_{BBAa}(i-1) + 0.5M_{bbAA}(i-1)\eta F_{BBAa}(i-1) \\
& + M_{bbAA}(i-1)F_{BBAa}(i-1) + 0.5M_{bbAA}(i-1)F_{BBAR}(i-1) + 0.125M_{bbAR}(i-1)(1-\Phi-\eta)F_{BbAa}(i-1) \\
& + 0.25M_{bbAR}(i-1)\Phi F_{BbAa}(i-1) + 0.125M_{bbAR}(i-1)\eta F_{BbAa}(i-1) + 0.25M_{bbAR}(i-1)F_{BbAA}(i-1) \\
& + 0.125M_{bbAR}(i-1)F_{BbAR}(i-1) + 0.25M_{bbAR}(i-1)(1-\Phi-\eta)F_{BBAa}(i-1) \\
& + 0.5M_{bbAR}(i-1)\Phi F_{BBAa}(i-1) + 0.25M_{bbAR}(i-1)\eta F_{BBAa}(i-1) + 0.5M_{bbAR}(i-1)F_{BBAa}(i-1) \\
& + 0.25M_{bbAR}(i-1)F_{BBAR}(i-1) + 0.125(1-\Phi-\eta)M_{BbAa}(i-1)F_{bbAa}(i-1) \\
& + 0.25\Phi M_{BbAa}(i-1)F_{bbAa}(i-1) + 0.125\eta M_{BbAa}(i-1)F_{bbAa}(i-1) \\
& + 0.25(1-\Phi-\eta)M_{BbAa}(i-1)F_{bbAA}(i-1) + 0.5\Phi M_{BbAa}(i-1)F_{bbAA}(i-1) \\
& + 0.25\eta M_{BbAa}(i-1)F_{bbAA}(i-1) + 0.125(1-\Phi-\eta)M_{BbAa}(i-1)F_{bbAR}(i-1) \\
& + 0.25\Phi M_{BbAa}(i-1)F_{bbAR}(i-1) + 0.125\eta M_{BbAa}(i-1)F_{bbAR}(i-1) \\
& + 0.125(1-\Phi-\eta)M_{BbAa}(i-1)(1-\Phi-\eta)F_{BbAa}(i-1) + 0.25\Phi M_{BbAa}(i-1)(1-\Phi-\eta)F_{BbAa}(i-1) \\
& + 0.125\eta M_{BbAa}(i-1)(1-\Phi-\eta)F_{BbAa}(i-1) + 0.25(1-\Phi-\eta)M_{BbAa}(i-1)\Phi F_{BbAa}(i-1) \\
& + 0.125(1-\Phi-\eta)M_{BbAa}(i-1)\eta F_{BbAa}(i-1) + 0.5\Phi M_{BbAa}(i-1)\Phi F_{BbAa}(i-1) \\
& + 0.25\Phi M_{BbAa}(i-1)\eta F_{BbAa}(i-1) + 0.25\eta M_{BbAa}(i-1)\Phi F_{BbAa}(i-1) + 0.125\eta M_{BbAa}(i-1)\eta F_{BbAa}(i-1) \\
& + 0.25(1-\Phi-\eta)M_{BbAa}(i-1)F_{BbAA}(i-1) + 0.5\Phi M_{BbAa}(i-1)F_{BbAA}(i-1) \\
& + 0.25\eta M_{BbAa}(i-1)F_{BbAA}(i-1) + 0.125(1-\Phi-\eta)M_{BbAa}(i-1)F_{BbAR}(i-1) \\
& + 0.25\Phi M_{BbAa}(i-1)F_{BbAR}(i-1) + 0.125\eta M_{BbAa}(i-1)F_{BbAR}(i-1) \\
& + 0.125(1-\Phi-\eta)M_{BbAa}(i-1)(1-\Phi-\eta)F_{BBAa}(i-1) + 0.25\Phi M_{BbAa}(i-1)(1-\Phi-\eta)F_{BBAa}(i-1) \\
& + 0.125\eta M_{BbAa}(i-1)(1-\Phi-\eta)F_{BBAa}(i-1) + 0.25(1-\Phi-\eta)M_{BbAa}(i-1)\Phi F_{BBAa}(i-1) \\
& + 0.125(1-\Phi-\eta)M_{BbAa}(i-1)\eta F_{BBAa}(i-1) + 0.5\Phi M_{BbAa}(i-1)\Phi F_{BBAa}(i-1) \\
& + 0.125\eta M_{BbAa}(i-1)\eta F_{BBAa}(i-1) + 0.25(1-\Phi-\eta)M_{BbAa}(i-1)F_{BBAa}(i-1) \\
& + 0.5\Phi M_{BbAa}(i-1)F_{BBAa}(i-1) + 0.25\eta M_{BbAa}(i-1)F_{BBAa}(i-1) \\
& + 0.125(1-\Phi-\eta)M_{BbAa}(i-1)F_{BBAR}(i-1) + 0.25\Phi M_{BbAa}(i-1)F_{BBAR}(i-1) \\
& + 0.125\eta M_{BbAa}(i-1)F_{BBAR}(i-1) + 0.25M_{BbAA}(i-1)F_{bbAa}(i-1) + 0.5M_{BbAA}(i-1)F_{bbAA}(i-1) \\
& + 0.25M_{BbAA}(i-1)F_{bbAR}(i-1) + 0.25M_{BbAA}(i-1)(1-\Phi-\eta)F_{BbAa}(i-1) \\
& + 0.5M_{BbAA}(i-1)\Phi F_{BbAa}(i-1) + 0.25M_{BbAA}(i-1)\eta F_{BbAa}(i-1) + 0.5M_{BbAA}(i-1)F_{BbAA}(i-1) \\
& + 0.25M_{BbAA}(i-1)F_{BbAR}(i-1) + 0.25M_{BbAA}(i-1)(1-\Phi-\eta)F_{BBAa}(i-1) \\
& + 0.5M_{BbAA}(i-1)\Phi F_{BBAa}(i-1) + 0.25M_{BbAA}(i-1)\eta F_{BBAa}(i-1) + 0.5M_{BbAA}(i-1)F_{BBAa}(i-1) \\
& + 0.25M_{BbAA}(i-1)F_{BBAR}(i-1) + 0.125M_{BbAR}(i-1)F_{bbAa}(i-1) + 0.25M_{BbAR}(i-1)F_{bbAA}(i-1) \\
& + 0.125M_{BbAR}(i-1)F_{bbAR}(i-1) + 0.125M_{BbAR}(i-1)(1-\Phi-\eta)F_{BbAa}(i-1) \\
& + 0.25M_{BbAR}(i-1)\Phi F_{BbAa}(i-1) + 0.125M_{BbAR}(i-1)\eta F_{BbAa}(i-1) + 0.25M_{BbAR}(i-1)F_{BbAA}(i-1) \\
& + 0.125M_{BbAR}(i-1)F_{BbAR}(i-1) + 0.125M_{BbAR}(i-1)(1-\Phi-\eta)F_{BBAa}(i-1) \\
& + 0.25M_{BbAR}(i-1)\Phi F_{BBAa}(i-1) + 0.125M_{BbAR}(i-1)\eta F_{BBAa}(i-1) + 0.25M_{BbAR}(i-1)F_{BBAa}(i-1) \\
& + 0.125M_{BbAR}(i-1)F_{BBAR}(i-1) + 0.25(1-\Phi-\eta)M_{BbAa}(i-1)F_{bbAa}(i-1) \\
& + 0.5\Phi M_{BbAa}(i-1)F_{bbAa}(i-1) + 0.25\eta M_{BbAa}(i-1)F_{bbAa}(i-1) \\
& + 0.5(1-\Phi-\eta)M_{BbAa}(i-1)F_{bbAA}(i-1) + \Phi M_{BbAa}(i-1)F_{bbAA}(i-1) + 0.5\eta M_{BbAa}(i-1)F_{bbAA}(i-1)
\end{aligned}$$

$$\begin{aligned}
& + 0.25(1 - \Phi - \eta)M_{BBAA}(i-1)F_{bbAR}(i-1) + 0.5\Phi M_{BBAA}(i-1)F_{bbAR}(i-1) \\
& + 0.25\eta M_{BBAA}(i-1)F_{bbAR}(i-1) + 0.125(1 - \Phi - \eta)M_{BBAA}(i-1)(1 - \Phi - \eta)F_{BbAa}(i-1) \\
& + 0.25\Phi M_{BBAA}(i-1)(1 - \Phi - \eta)F_{BbAa}(i-1) + 0.125\eta M_{BBAA}(i-1)(1 - \Phi - \eta)F_{BbAa}(i-1) \\
& + 0.25(1 - \Phi - \eta)M_{BBAA}(i-1)\Phi F_{BbAa}(i-1) + 0.125(1 - \Phi - \eta)M_{BBAA}(i-1)\eta F_{BbAa}(i-1) \\
& + 0.5\Phi M_{BBAA}(i-1)\Phi F_{BbAa}(i-1) + 0.25\Phi M_{BBAA}(i-1)\eta F_{BbAa}(i-1) \\
& + 0.25\eta M_{BBAA}(i-1)\Phi F_{BbAa}(i-1) + 0.125\eta M_{BBAA}(i-1)\eta F_{BbAa}(i-1) \\
& + 0.25(1 - \Phi - \eta)M_{BBAA}(i-1)F_{BbAA}(i-1) + 0.5\Phi M_{BBAA}(i-1)F_{BbAA}(i-1) \\
& + 0.25\eta M_{BBAA}(i-1)F_{BbAA}(i-1) + 0.125(1 - \Phi - \eta)M_{BBAA}(i-1)F_{BbAR}(i-1) \\
& + 0.25\Phi M_{BBAA}(i-1)F_{BbAR}(i-1) + 0.125\eta M_{BBAA}(i-1)F_{BbAR}(i-1) + 0.5M_{BBAA}(i-1)F_{bbAa}(i-1) \\
& + M_{BBAA}(i-1)F_{bbAA}(i-1) + 0.5M_{BBAA}(i-1)F_{bbAR}(i-1) + 0.25M_{BBAA}(i-1)(1 - \Phi - \eta)F_{BbAa}(i-1) \\
& + 0.5M_{BBAA}(i-1)\Phi F_{BbAa}(i-1) + 0.25M_{BBAA}(i-1)\eta F_{BbAa}(i-1) + 0.5M_{BBAA}(i-1)F_{BbAA}(i-1) \\
& + 0.25M_{BBAA}(i-1)F_{BbAR}(i-1) + 0.25M_{BBAR}(i-1)F_{bbAa}(i-1) + 0.5M_{BBAR}(i-1)F_{bbAA}(i-1) \\
& + 0.25M_{BBAR}(i-1)F_{bbAR}(i-1) + 0.125M_{BBAR}(i-1)(1 - \Phi - \eta)F_{BbAa}(i-1) \\
& + 0.25M_{BBAR}(i-1)\Phi F_{BbAa}(i-1) + 0.125M_{BBAR}(i-1)\eta F_{BbAa}(i-1) + 0.25M_{BBAR}(i-1)F_{BbAA}(i-1) \\
& + 0.125M_{BBAR}(i-1)F_{BbAR}(i-1)],
\end{aligned}$$

$$\begin{aligned}
M_{BbAR}^e & = \left( \frac{\Omega_{BbAR}}{2} \right) [0.125M_{bbAa}(i-1)\eta F_{BbAa}(i-1) + 0.125M_{bbAa}(i-1)F_{BbRa}(i-1) \\
& + 0.125M_{bbAa}(i-1)F_{BbAR}(i-1) + 0.25M_{bbAa}(i-1)F_{BbRR}(i-1) + 0.25M_{bbAa}(i-1)\eta F_{BBAA}(i-1) \\
& + 0.25M_{bbAa}(i-1)F_{BBRa}(i-1) + 0.25M_{bbAa}(i-1)F_{BBAR}(i-1) + 0.5M_{bbAa}(i-1)F_{BBRR}(i-1) \\
& + 0.125M_{bbRa}(i-1)(1 - \Phi - \eta)F_{BbAa}(i-1) + 0.25M_{bbRa}(i-1)\Phi F_{BbAa}(i-1) \\
& + 0.125M_{bbRa}(i-1)\eta F_{BbAa}(i-1) + 0.25M_{bbRa}(i-1)F_{BbAA}(i-1) + 0.125M_{bbRa}(i-1)F_{BbAR}(i-1) \\
& + 0.25M_{bbRa}(i-1)(1 - \Phi - \eta)F_{BBAA}(i-1) + 0.5M_{bbRa}(i-1)\Phi F_{BBAA}(i-1) \\
& + 0.25M_{bbRa}(i-1)\eta F_{BBAA}(i-1) + 0.5M_{bbRa}(i-1)F_{BBAA}(i-1) + 0.25M_{bbRa}(i-1)F_{BBAR}(i-1) \\
& + 0.25M_{bbAA}(i-1)\eta F_{BbAa}(i-1) + 0.25M_{bbAA}(i-1)F_{BbRa}(i-1) + 0.25M_{bbAA}(i-1)F_{BbAR}(i-1) \\
& + 0.5M_{bbAA}(i-1)F_{BbRR}(i-1) + 0.5M_{bbAA}(i-1)\eta F_{BBAA}(i-1) + 0.5M_{bbAA}(i-1)F_{BBRa}(i-1) \\
& + 0.5M_{bbAA}(i-1)F_{BBAR}(i-1) + M_{bbAA}(i-1)F_{BBRR}(i-1) + 0.125M_{bbAR}(i-1)(1 - \Phi - \eta)F_{BbAa}(i-1) \\
& + 0.25M_{bbAR}(i-1)\Phi F_{BbAa}(i-1) + 0.25M_{bbAR}(i-1)\eta F_{BbAa}(i-1) + 0.125M_{bbAR}(i-1)F_{BbRa}(i-1) \\
& + 0.25M_{bbAR}(i-1)F_{BbAA}(i-1) + 0.25M_{bbAR}(i-1)F_{BbAR}(i-1) + 0.25M_{bbAR}(i-1)F_{BbRR}(i-1) \\
& + 0.25M_{bbAR}(i-1)(1 - \Phi - \eta)F_{BbAa}(i-1) + 0.5M_{bbAR}(i-1)\Phi F_{BBAA}(i-1) \\
& + 0.5M_{bbAR}(i-1)\eta F_{BBAA}(i-1) + 0.25M_{bbAR}(i-1)F_{BBRa}(i-1) + 0.5M_{bbAR}(i-1)F_{BBAA}(i-1) \\
& + 0.5M_{bbAR}(i-1)F_{BBAR}(i-1) + 0.5M_{bbAR}(i-1)F_{BBRR}(i-1) + 0.25M_{bbRR}(i-1)(1 - \Phi - \eta)F_{BbAa}(i-1) \\
& + 0.5M_{bbRR}(i-1)\Phi F_{BbAa}(i-1) + 0.25M_{bbRR}(i-1)\eta F_{BbAa}(i-1) + 0.5M_{bbRR}(i-1)F_{BbAA}(i-1) \\
& + 0.25M_{bbRR}(i-1)F_{BbAR}(i-1) + 0.5M_{bbRR}(i-1)(1 - \Phi - \eta)F_{BBAA}(i-1) + M_{bbRR}(i-1)\Phi F_{BBAA}(i-1) \\
& + 0.5M_{bbRR}(i-1)\eta F_{BBAA}(i-1) + M_{bbRR}(i-1)F_{BBAA}(i-1) + 0.5M_{bbRR}(i-1)F_{BBAR}(i-1) \\
& + 0.125\eta M_{BbAa}(i-1)F_{bbAa}(i-1) + 0.125(1 - \Phi - \eta)M_{BbAa}(i-1)F_{bbRa}(i-1) \\
& + 0.25\Phi M_{BbAa}(i-1)F_{bbRa}(i-1) + 0.125\eta M_{BbAa}(i-1)F_{bbRa}(i-1) + 0.25\eta M_{BbAa}(i-1)F_{bbAA}(i-1) \\
& + 0.125(1 - \Phi - \eta)M_{BbAa}(i-1)F_{bbAR}(i-1) + 0.25\Phi M_{BbAa}(i-1)F_{bbAR}(i-1) \\
& + 0.25\eta M_{BbAa}(i-1)F_{bbAR}(i-1) + 0.25(1 - \Phi - \eta)M_{BbAa}(i-1)F_{bbRR}(i-1) \\
& + 0.5\Phi M_{BbAa}(i-1)F_{bbRR}(i-1) + 0.25\eta M_{BbAa}(i-1)F_{bbRR}(i-1) \\
& + 0.125\eta M_{BbAa}(i-1)(1 - \Phi - \eta)F_{BbAa}(i-1) + 0.125(1 - \Phi - \eta)M_{BbAa}(i-1)\eta F_{BbAa}(i-1) \\
& + 0.25\Phi M_{BbAa}(i-1)\eta F_{BbAa}(i-1) + 0.25\eta M_{BbAa}(i-1)\Phi F_{BbAa}(i-1) + 0.25\eta M_{BbAa}(i-1)\eta F_{BbAa}(i-1) \\
& + 0.125(1 - \Phi - \eta)M_{BbAa}(i-1)F_{BbRa}(i-1) + 0.25\Phi M_{BbAa}(i-1)F_{BbRa}(i-1) \\
& + 0.125\eta M_{BbAa}(i-1)F_{BbRa}(i-1) + 0.25\eta M_{BbAa}(i-1)F_{BbAA}(i-1) \\
& + 0.125(1 - \Phi - \eta)M_{BbAa}(i-1)F_{BbAR}(i-1) + 0.25\Phi M_{BbAa}(i-1)F_{BbAR}(i-1) \\
& + 0.25\eta M_{BbAa}(i-1)F_{BbAR}(i-1) + 0.25(1 - \Phi - \eta)M_{BbAa}(i-1)F_{BbRR}(i-1) \\
& + 0.5\Phi M_{BbAa}(i-1)F_{BbRR}(i-1) + 0.25\eta M_{BbAa}(i-1)F_{BbRR}(i-1) \\
& + 0.125\eta M_{BbAa}(i-1)(1 - \Phi - \eta)F_{BBAA}(i-1) + 0.125(1 - \Phi - \eta)M_{BbAa}(i-1)\eta F_{BBAA}(i-1)
\end{aligned}$$

$$\begin{aligned}
& + 0.25\Phi M_{BbAa}(i-1)\eta F_{BBAA}(i-1) + 0.25\eta M_{BbAa}(i-1)\Phi F_{BBAA}(i-1) \\
& + 0.25\eta M_{BbAa}(i-1)\eta F_{BBAA}(i-1) + 0.125(1-\Phi-\eta)M_{BbAa}(i-1)F_{BBRa}(i-1) \\
& + 0.25\Phi M_{BbAa}(i-1)F_{BBRa}(i-1) + 0.125\eta M_{BbAa}(i-1)F_{BBRa}(i-1) + 0.25\eta M_{BbAa}(i-1)F_{BBAA}(i-1) \\
& + 0.125(1-\Phi-\eta)M_{BbAa}(i-1)F_{BBAR}(i-1) + 0.25\Phi M_{BbAa}(i-1)F_{BBAR}(i-1) \\
& + 0.25\eta M_{BbAa}(i-1)F_{BBAR}(i-1) + 0.25(1-\Phi-\eta)M_{BbAa}(i-1)F_{BBRR}(i-1) \\
& + 0.5\Phi M_{BbAa}(i-1)F_{BBRR}(i-1) + 0.25\eta M_{BbAa}(i-1)F_{BBRR}(i-1) + 0.125M_{BbRa}(i-1)F_{bbAa}(i-1) \\
& + 0.25M_{BbRa}(i-1)F_{bbAA}(i-1) + 0.125M_{BbRa}(i-1)F_{bbAR}(i-1) \\
& + 0.125M_{BbRa}(i-1)(1-\Phi-\eta)F_{bbAa}(i-1) + 0.25M_{BbRa}(i-1)\Phi F_{bbAa}(i-1) \\
& + 0.125M_{BbRa}(i-1)\eta F_{bbAa}(i-1) + 0.25M_{BbRa}(i-1)F_{bbAA}(i-1) + 0.125M_{BbRa}(i-1)F_{bbAR}(i-1) \\
& + 0.125M_{BbRa}(i-1)(1-\Phi-\eta)F_{BBAA}(i-1) + 0.25M_{BbRa}(i-1)\Phi F_{BBAA}(i-1) \\
& + 0.125M_{BbRa}(i-1)\eta F_{BBAA}(i-1) + 0.25M_{BbRa}(i-1)F_{BBAA}(i-1) + 0.125M_{BbRa}(i-1)F_{BBAR}(i-1) \\
& + 0.25M_{BbAA}(i-1)F_{bbRa}(i-1) + 0.25M_{BbAA}(i-1)F_{bbAR}(i-1) + 0.5M_{BbAA}(i-1)F_{bbRR}(i-1) \\
& + 0.25M_{BbAA}(i-1)\eta F_{bbAa}(i-1) + 0.25M_{BbAA}(i-1)F_{bbRa}(i-1) + 0.25M_{BbAA}(i-1)F_{bbAR}(i-1) \\
& + 0.5M_{BbAA}(i-1)F_{bbRR}(i-1) + 0.25M_{BbAA}(i-1)\eta F_{BBAA}(i-1) + 0.25M_{BbAA}(i-1)F_{BBRa}(i-1) \\
& + 0.25M_{BbAA}(i-1)F_{BBAR}(i-1) + 0.5M_{BbAA}(i-1)F_{BBRR}(i-1) + 0.125M_{BbAR}(i-1)F_{bbAa}(i-1) \\
& + 0.125M_{BbAR}(i-1)F_{bbRa}(i-1) + 0.25M_{BbAR}(i-1)F_{bbAA}(i-1) + 0.25M_{BbAR}(i-1)F_{bbAR}(i-1) \\
& + 0.25M_{BbAR}(i-1)F_{bbRR}(i-1) + 0.125M_{BbAR}(i-1)(1-\Phi-\eta)F_{bbAa}(i-1) \\
& + 0.25M_{BbAR}(i-1)\Phi F_{bbAa}(i-1) + 0.25M_{BbAR}(i-1)\eta F_{bbAa}(i-1) + 0.125M_{BbAR}(i-1)F_{bbRa}(i-1) \\
& + 0.25M_{BbAR}(i-1)F_{bbAA}(i-1) + 0.25M_{BbAR}(i-1)F_{bbAR}(i-1) + 0.25M_{BbAR}(i-1)F_{bbRR}(i-1) \\
& + 0.125M_{BbAR}(i-1)(1-\Phi-\eta)F_{BBAA}(i-1) + 0.25M_{BbAR}(i-1)\Phi F_{BBAA}(i-1) \\
& + 0.25M_{BbAR}(i-1)\eta F_{BBAA}(i-1) + 0.125M_{BbAR}(i-1)F_{BBRa}(i-1) + 0.25M_{BbAR}(i-1)F_{BBAA}(i-1) \\
& + 0.25M_{BbAR}(i-1)F_{BBAR}(i-1) + 0.25M_{BbAR}(i-1)F_{BBRR}(i-1) + 0.25M_{BbRR}(i-1)F_{bbAa}(i-1) \\
& + 0.5M_{BbRR}(i-1)F_{bbAA}(i-1) + 0.25M_{BbRR}(i-1)F_{bbAR}(i-1) + 0.25M_{BbRR}(i-1)(1-\Phi-\eta)F_{bbAa}(i-1) \\
& + 0.5M_{BbRR}(i-1)\Phi F_{bbAa}(i-1) + 0.25M_{BbRR}(i-1)\eta F_{bbAa}(i-1) + 0.5M_{BbRR}(i-1)F_{bbAA}(i-1) \\
& + 0.25M_{BbRR}(i-1)F_{bbAR}(i-1) + 0.25M_{BbRR}(i-1)(1-\Phi-\eta)F_{BBAA}(i-1) \\
& + 0.5M_{BbRR}(i-1)\Phi F_{BBAA}(i-1) + 0.25M_{BbRR}(i-1)\eta F_{BBAA}(i-1) + 0.5M_{BbRR}(i-1)F_{BBAA}(i-1) \\
& + 0.25M_{BbRR}(i-1)F_{BBAR}(i-1) + 0.25\eta M_{BbAA}(i-1)F_{bbAa}(i-1) \\
& + 0.25(1-\Phi-\eta)M_{BbAA}(i-1)F_{bbRa}(i-1) + 0.5\Phi M_{BbAA}(i-1)F_{bbRa}(i-1) \\
& + 0.25\eta M_{BbAA}(i-1)F_{bbRa}(i-1) + 0.5\eta M_{BbAA}(i-1)F_{bbAA}(i-1) \\
& + 0.25(1-\Phi-\eta)M_{BbAA}(i-1)F_{bbAR}(i-1) + 0.5\Phi M_{BbAA}(i-1)F_{bbAR}(i-1) \\
& + 0.5\eta M_{BbAA}(i-1)F_{bbAR}(i-1) + 0.5(1-\Phi-\eta)M_{BbAA}(i-1)F_{bbRR}(i-1) + \Phi M_{BbAA}(i-1)F_{bbRR}(i-1) \\
& + 0.5\eta M_{BbAA}(i-1)F_{bbRR}(i-1) + 0.125\eta M_{BbAA}(i-1)(1-\Phi-\eta)F_{bbAa}(i-1) \\
& + 0.125(1-\Phi-\eta)M_{BbAA}(i-1)\eta F_{bbAa}(i-1) + 0.25\Phi M_{BbAA}(i-1)\eta F_{bbAa}(i-1) \\
& + 0.25\eta M_{BbAA}(i-1)\Phi F_{bbAa}(i-1) + 0.25\eta M_{BbAA}(i-1)\eta F_{bbAa}(i-1) \\
& + 0.125(1-\Phi-\eta)M_{BbAA}(i-1)F_{bbRa}(i-1) + 0.25\Phi M_{BbAA}(i-1)F_{bbRa}(i-1) \\
& + 0.125\eta M_{BbAA}(i-1)F_{bbRa}(i-1) + 0.25\eta M_{BbAA}(i-1)F_{bbAA}(i-1) \\
& + 0.125(1-\Phi-\eta)M_{BbAA}(i-1)F_{bbAR}(i-1) + 0.25\Phi M_{BbAA}(i-1)F_{bbAR}(i-1) \\
& + 0.25\eta M_{BbAA}(i-1)F_{bbAR}(i-1) + 0.25(1-\Phi-\eta)M_{BbAA}(i-1)F_{bbRR}(i-1) \\
& + 0.5\Phi M_{BbAA}(i-1)F_{bbRR}(i-1) + 0.25\eta M_{BbAA}(i-1)F_{bbRR}(i-1) + 0.25M_{BBRa}(i-1)F_{bbAa}(i-1) \\
& + 0.5M_{BBRa}(i-1)F_{bbAA}(i-1) + 0.25M_{BBRa}(i-1)F_{bbAR}(i-1) + 0.125M_{BBRa}(i-1)(1-\Phi-\eta)F_{bbAa}(i-1) \\
& + 0.125M_{BBRa}(i-1)\eta F_{bbAa}(i-1) + 0.25M_{BBRa}(i-1)F_{bbAA}(i-1) + 0.125M_{BBRa}(i-1)F_{bbAR}(i-1) \\
& + 0.5M_{BBAA}(i-1)F_{bbRa}(i-1) + 0.5M_{BBAA}(i-1)F_{bbAR}(i-1) + M_{BBAA}(i-1)F_{bbRR}(i-1) \\
& + 0.25M_{BBAA}(i-1)\eta F_{bbAa}(i-1) + 0.25M_{BBAA}(i-1)F_{bbRa}(i-1) + 0.25M_{BBAA}(i-1)F_{bbAR}(i-1) \\
& + 0.5M_{BBAA}(i-1)F_{bbRR}(i-1) + 0.25M_{BBAR}(i-1)F_{bbAa}(i-1) + 0.25M_{BBAR}(i-1)F_{bbRa}(i-1) \\
& + 0.5M_{BBAR}(i-1)F_{bbAA}(i-1) + 0.5M_{BBAR}(i-1)F_{bbAR}(i-1) + 0.5M_{BBAR}(i-1)F_{bbRR}(i-1) \\
& + 0.125M_{BBAR}(i-1)(1-\Phi-\eta)F_{bbAa}(i-1) + 0.25M_{BBAR}(i-1)\Phi F_{bbAa}(i-1) \\
& + 0.25M_{BBAR}(i-1)\eta F_{bbAa}(i-1) + 0.125M_{BBAR}(i-1)F_{bbRa}(i-1) + 0.25M_{BBAR}(i-1)F_{bbAA}(i-1)
\end{aligned}$$

$$\begin{aligned}
& + 0.25M_{BBAR}(i-1)F_{BbAR}(i-1) + 0.25M_{BBAR}(i-1)F_{BbRR}(i-1) + 0.5M_{BBRR}(i-1)F_{bbAa}(i-1) \\
& + M_{BBRR}(i-1)F_{bbAA}(i-1) + 0.5M_{BBRR}(i-1)F_{bbAR}(i-1) + 0.25M_{BBRR}(i-1)(1-\Phi-\eta)F_{BbAa}(i-1) \\
& + 0.5M_{BBRR}(i-1)\Phi F_{BbAa}(i-1) + 0.25M_{BBRR}(i-1)\eta F_{BbAa}(i-1) + 0.5M_{BBRR}(i-1)F_{BbAA}(i-1) \\
& + 0.25M_{BBRR}(i-1)F_{BbAR}(i-1)], \\
M_{BbRR}^e & = (\Omega_{BbRR}/2)[0.125M_{bbRa}(i-1)\eta F_{BbAa}(i-1) + 0.125M_{bbRa}(i-1)F_{BbRa}(i-1) \\
& + 0.125M_{bbRa}(i-1)F_{BbAR}(i-1) + 0.25M_{bbRa}(i-1)F_{BbRR}(i-1) + 0.25M_{bbRa}(i-1)\eta F_{BBAA}(i-1) \\
& + 0.25M_{bbRa}(i-1)F_{BBRa}(i-1) + 0.25M_{bbRa}(i-1)F_{BBAR}(i-1) + 0.5M_{bbRa}(i-1)F_{BBRR}(i-1) \\
& + 0.125M_{bbAR}(i-1)\eta F_{BbAa}(i-1) + 0.125M_{bbAR}(i-1)F_{BbRa}(i-1) + 0.125M_{bbAR}(i-1)F_{BbAR}(i-1) \\
& + 0.25M_{bbAR}(i-1)F_{BbRR}(i-1) + 0.25M_{bbAR}(i-1)\eta F_{BBAA}(i-1) + 0.25M_{bbAR}(i-1)F_{BBRa}(i-1) \\
& + 0.25M_{bbAR}(i-1)F_{BBAR}(i-1) + 0.5M_{bbAR}(i-1)F_{BBRR}(i-1) + 0.25M_{bbRR}(i-1)\eta F_{BbAa}(i-1) \\
& + 0.25M_{bbRR}(i-1)F_{BbRa}(i-1) + 0.25M_{bbRR}(i-1)F_{BbAR}(i-1) + 0.5M_{bbRR}(i-1)F_{BbRR}(i-1) \\
& + 0.5M_{bbRR}(i-1)\eta F_{BBAA}(i-1) + 0.5M_{bbRR}(i-1)F_{BBRa}(i-1) + 0.5M_{bbRR}(i-1)F_{BBAR}(i-1) \\
& + M_{bbRR}(i-1)F_{BBRR}(i-1) + 0.125\eta M_{BbAa}(i-1)F_{bbRa}(i-1) + 0.125\eta M_{BbAa}(i-1)F_{bbAR}(i-1) \\
& + 0.25\eta M_{BbAa}(i-1)F_{bbRR}(i-1) + 0.125\eta M_{BbAa}(i-1)\eta F_{BbAa}(i-1) + 0.125\eta M_{BbAa}(i-1)F_{BbRa}(i-1) \\
& + 0.125\eta M_{BbAa}(i-1)F_{BbAR}(i-1) + 0.25\eta M_{BbAa}(i-1)F_{BbRR}(i-1) + 0.125\eta M_{BbAa}(i-1)\eta F_{BBAA}(i-1) \\
& + 0.125\eta M_{BbAa}(i-1)F_{BBRa}(i-1) + 0.125\eta M_{BbAa}(i-1)F_{BBAR}(i-1) + 0.25\eta M_{BbAa}(i-1)F_{BBRR}(i-1) \\
& + 0.125M_{BbRa}(i-1)F_{bbRa}(i-1) + 0.125M_{BbRa}(i-1)F_{bbAR}(i-1) + 0.25M_{BbRa}(i-1)F_{bbRR}(i-1) \\
& + 0.125M_{BbRa}(i-1)\eta F_{BbAa}(i-1) + 0.125M_{BbRa}(i-1)F_{BbRa}(i-1) + 0.125M_{BbRa}(i-1)F_{BbAR}(i-1) \\
& + 0.25M_{BbRa}(i-1)F_{BbRR}(i-1) + 0.125M_{BbRa}(i-1)\eta F_{BBAA}(i-1) + 0.125M_{BbRa}(i-1)F_{BBRa}(i-1) \\
& + 0.125M_{BbRa}(i-1)F_{BBAR}(i-1) + 0.25M_{BbRa}(i-1)F_{BBRR}(i-1) + 0.125M_{BbAR}(i-1)F_{bbRa}(i-1) \\
& + 0.125M_{BbAR}(i-1)F_{bbAR}(i-1) + 0.25M_{BbAR}(i-1)F_{bbRR}(i-1) + 0.125M_{BbAR}(i-1)\eta F_{BbAa}(i-1) \\
& + 0.125M_{BbAR}(i-1)F_{BbRa}(i-1) + 0.125M_{BbAR}(i-1)F_{BbAR}(i-1) + 0.25M_{BbAR}(i-1)F_{BbRR}(i-1) \\
& + 0.125M_{BbAR}(i-1)\eta F_{BBAA}(i-1) + 0.125M_{BbAR}(i-1)F_{BBRa}(i-1) + 0.125M_{BbAR}(i-1)F_{BBAR}(i-1) \\
& + 0.25M_{BbAR}(i-1)F_{BBRR}(i-1) + 0.25M_{BbRR}(i-1)F_{bbRa}(i-1) + 0.25M_{BbRR}(i-1)F_{bbAR}(i-1) \\
& + 0.5M_{BbRR}(i-1)F_{bbRR}(i-1) + 0.25M_{BbRR}(i-1)\eta F_{BbAa}(i-1) + 0.25M_{BbRR}(i-1)F_{BbRa}(i-1) \\
& + 0.25M_{BbRR}(i-1)F_{BbAR}(i-1) + 0.5M_{BbRR}(i-1)F_{BbRR}(i-1) + 0.25M_{BbRR}(i-1)\eta F_{BBAA}(i-1) \\
& + 0.25M_{BbRR}(i-1)F_{BBRa}(i-1) + 0.25M_{BbRR}(i-1)F_{BBAR}(i-1) + 0.5M_{BbRR}(i-1)F_{BBRR}(i-1) \\
& + 0.25\eta M_{BBAA}(i-1)F_{bbRa}(i-1) + 0.25\eta M_{BBAA}(i-1)F_{bbAR}(i-1) + 0.5\eta M_{BBAA}(i-1)F_{bbRR}(i-1) \\
& + 0.125\eta M_{BBAA}(i-1)\eta F_{BbAa}(i-1) + 0.125\eta M_{BBAA}(i-1)F_{BbRa}(i-1) + 0.125\eta M_{BBAA}(i-1)F_{BbAR}(i-1) \\
& + 0.25\eta M_{BBAA}(i-1)F_{BbRR}(i-1) + 0.25M_{BBRa}(i-1)F_{bbRa}(i-1) + 0.25M_{BBRa}(i-1)F_{bbAR}(i-1) \\
& + 0.5M_{BBRa}(i-1)F_{bbRR}(i-1) + 0.125M_{BBRa}(i-1)\eta F_{BbAa}(i-1) + 0.125M_{BBRa}(i-1)F_{BbRa}(i-1) \\
& + 0.125M_{BBRa}(i-1)F_{BbAR}(i-1) + 0.25M_{BBRa}(i-1)F_{BbRR}(i-1) + 0.25M_{BBAR}(i-1)F_{bbRa}(i-1) \\
& + 0.25M_{BBAR}(i-1)F_{bbAR}(i-1) + 0.5M_{BBAR}(i-1)F_{bbRR}(i-1) + 0.125M_{BBAR}(i-1)\eta F_{BbAa}(i-1) \\
& + 0.125M_{BBAR}(i-1)F_{BbRa}(i-1) + 0.125M_{BBAR}(i-1)F_{BbAR}(i-1) + 0.25M_{BBAR}(i-1)F_{BbRR}(i-1) \\
& + 0.5M_{BBRR}(i-1)F_{bbRa}(i-1) + 0.5M_{BBRR}(i-1)F_{bbAR}(i-1) + M_{BBRR}(i-1)F_{bbRR}(i-1) \\
& + 0.25M_{BBRR}(i-1)\eta F_{BbAa}(i-1) + 0.25M_{BBRR}(i-1)F_{BbRa}(i-1) + 0.25M_{BBRR}(i-1)F_{BbAR}(i-1) \\
& + 0.5M_{BBRR}(i-1)F_{BbRR}(i-1)], \\
M_{BBaa}^e & = (\Omega_{BBaa}/2)[0.25M_{Bbaa}(i-1)F_{Bbaa}(i-1) + 0.125M_{Bbaa}(i-1)(1-\Phi-\eta)F_{BbAa}(i-1) \\
& + 0.125M_{Bbaa}(i-1)F_{BbRa}(i-1) + 0.5M_{Bbaa}(i-1)F_{BBaa}(i-1) \\
& + 0.25M_{Bbaa}(i-1)(1-\Phi-\eta)F_{BBAA}(i-1) + 0.25M_{Bbaa}(i-1)F_{BBRa}(i-1) \\
& + 0.125(1-\Phi-\eta)M_{BbAa}(i-1)F_{Bbaa}(i-1) + 0.0625(1-\Phi-\eta)M_{BbAa}(i-1)(1-\Phi-\eta)F_{BbAa}(i-1) \\
& + 0.0625(1-\Phi-\eta)M_{BbAa}(i-1)F_{BbRa}(i-1) + 0.25(1-\Phi-\eta)M_{BbAa}(i-1)F_{BBaa}(i-1) \\
& + 0.125(1-\Phi-\eta)M_{BbAa}(i-1)(1-\Phi-\eta)F_{BBAA}(i-1) + 0.125(1-\Phi-\eta)M_{BbAa}(i-1)F_{BBRa}(i-1) \\
& + 0.125M_{BbRa}(i-1)F_{Bbaa}(i-1) + 0.0625M_{BbRa}(i-1)(1-\Phi-\eta)F_{BbAa}(i-1) \\
& + 0.0625M_{BbRa}(i-1)F_{BbRa}(i-1) + 0.25M_{BbRa}(i-1)F_{BBaa}(i-1) \\
& + 0.125M_{BbRa}(i-1)(1-\Phi-\eta)F_{BBAA}(i-1) + 0.125M_{BbRa}(i-1)F_{BBRa}(i-1) \\
& + 0.5M_{BBaa}(i-1)F_{Bbaa}(i-1) + 0.25M_{BBaa}(i-1)(1-\Phi-\eta)F_{BbAa}(i-1) + 0.25M_{BBaa}(i-1)F_{BbRa}(i-1)
\end{aligned}$$

$$\begin{aligned}
& + M_{BBaa}(i-1)F_{BBaa}(i-1) + 0.5M_{BBaa}(i-1)(1-\Phi-\eta)F_{BBaa}(i-1) + 0.5M_{BBaa}(i-1)F_{BBRa}(i-1) \\
& + 0.25(1-\Phi-\eta)M_{BBaa}(i-1)F_{Bbaa}(i-1) + 0.125(1-\Phi-\eta)M_{BBaa}(i-1)(1-\Phi-\eta)F_{Bbaa}(i-1) \\
& + 0.125(1-\Phi-\eta)M_{BBaa}(i-1)F_{BbRa}(i-1) + 0.5(1-\Phi-\eta)M_{BBaa}(i-1)F_{BBaa}(i-1) \\
& + 0.25(1-\Phi-\eta)M_{BBaa}(i-1)(1-\Phi-\eta)F_{BBaa}(i-1) + 0.25(1-\Phi-\eta)M_{BBaa}(i-1)F_{BBRa}(i-1) \\
& + 0.25M_{BBRa}(i-1)F_{Bbaa}(i-1) + 0.125M_{BBRa}(i-1)(1-\Phi-\eta)F_{Bbaa}(i-1) \\
& + 0.125M_{BBRa}(i-1)F_{BbRa}(i-1) + 0.5M_{BBRa}(i-1)F_{BBaa}(i-1) \\
& + 0.25M_{BBRa}(i-1)(1-\Phi-\eta)F_{BBaa}(i-1) + 0.25M_{BBRa}(i-1)F_{BBRa}(i-1)], \\
M_{BBaa}^e & = \left( \frac{\Omega_{BBaa}}{2} \right) [0.125M_{Bbaa}(i-1)(1-\Phi-\eta)F_{Bbaa}(i-1) + 0.25M_{Bbaa}(i-1)\Phi F_{Bbaa}(i-1) \\
& + 0.125M_{Bbaa}(i-1)\eta F_{Bbaa}(i-1) + 0.25M_{Bbaa}(i-1)F_{Bbaa}(i-1) + 0.125M_{Bbaa}(i-1)F_{BBAR}(i-1) \\
& + 0.25M_{Bbaa}(i-1)(1-\Phi-\eta)F_{BBaa}(i-1) + 0.5M_{Bbaa}(i-1)\Phi F_{BBaa}(i-1) \\
& + 0.25M_{Bbaa}(i-1)\eta F_{BBaa}(i-1) + 0.5M_{Bbaa}(i-1)F_{BBaa}(i-1) + 0.25M_{Bbaa}(i-1)F_{BBAR}(i-1) \\
& + 0.125(1-\Phi-\eta)M_{Bbaa}(i-1)F_{Bbaa}(i-1) + 0.25\Phi M_{Bbaa}(i-1)F_{Bbaa}(i-1) \\
& + 0.125\eta M_{Bbaa}(i-1)F_{Bbaa}(i-1) + 0.125(1-\Phi-\eta)M_{Bbaa}(i-1)(1-\Phi-\eta)F_{Bbaa}(i-1) \\
& + 0.125\Phi M_{Bbaa}(i-1)(1-\Phi-\eta)F_{Bbaa}(i-1) + 0.0625\eta M_{Bbaa}(i-1)(1-\Phi-\eta)F_{Bbaa}(i-1) \\
& + 0.125(1-\Phi-\eta)M_{Bbaa}(i-1)\Phi F_{Bbaa}(i-1) + 0.0625(1-\Phi-\eta)M_{Bbaa}(i-1)\eta F_{Bbaa}(i-1) \\
& + 0.0625(1-\Phi-\eta)M_{Bbaa}(i-1)F_{BbRa}(i-1) + 0.125\Phi M_{Bbaa}(i-1)F_{BbRa}(i-1) \\
& + 0.0625\eta M_{Bbaa}(i-1)F_{BbRa}(i-1) + 0.125(1-\Phi-\eta)M_{Bbaa}(i-1)F_{Bbaa}(i-1) \\
& + 0.0625(1-\Phi-\eta)M_{Bbaa}(i-1)F_{BBAR}(i-1) + 0.25(1-\Phi-\eta)M_{Bbaa}(i-1)F_{BBaa}(i-1) \\
& + 0.5\Phi M_{Bbaa}(i-1)F_{BBaa}(i-1) + 0.25\eta M_{Bbaa}(i-1)F_{BBaa}(i-1) \\
& + 0.25(1-\Phi-\eta)M_{Bbaa}(i-1)(1-\Phi-\eta)F_{BBaa}(i-1) + 0.25\Phi M_{Bbaa}(i-1)(1-\Phi-\eta)F_{BBaa}(i-1) \\
& + 0.125\eta M_{Bbaa}(i-1)(1-\Phi-\eta)F_{BBaa}(i-1) + 0.125(1-\Phi-\eta)M_{Bbaa}(i-1)\Phi F_{BBaa}(i-1) \\
& + 0.0625(1-\Phi-\eta)M_{Bbaa}(i-1)\eta F_{BBaa}(i-1) + 0.125(1-\Phi-\eta)M_{Bbaa}(i-1)F_{BBRa}(i-1) \\
& + 0.25\Phi M_{Bbaa}(i-1)F_{BBRa}(i-1) + 0.125\eta M_{Bbaa}(i-1)F_{BBRa}(i-1) \\
& + 0.25(1-\Phi-\eta)M_{Bbaa}(i-1)F_{BBAA}(i-1) + 0.125(1-\Phi-\eta)M_{Bbaa}(i-1)F_{BBAR}(i-1) \\
& + 0.0625M_{BbRa}(i-1)(1-\Phi-\eta)F_{Bbaa}(i-1) + 0.125M_{BbRa}(i-1)\Phi F_{Bbaa}(i-1) \\
& + 0.0625M_{BbRa}(i-1)\eta F_{Bbaa}(i-1) + 0.125M_{BbRa}(i-1)F_{Bbaa}(i-1) + 0.0625M_{BbRa}(i-1)F_{BBAR}(i-1) \\
& + 0.125M_{BbRa}(i-1)(1-\Phi-\eta)F_{BBaa}(i-1) + 0.25M_{BbRa}(i-1)\Phi F_{BBaa}(i-1) \\
& + 0.125M_{BbRa}(i-1)\eta F_{BBaa}(i-1) + 0.25M_{BbRa}(i-1)F_{BBAA}(i-1) + 0.125M_{BbRa}(i-1)F_{BBAR}(i-1) \\
& + 0.25M_{BbAA}(i-1)F_{Bbaa}(i-1) + 0.125M_{BbAA}(i-1)(1-\Phi-\eta)F_{Bbaa}(i-1) \\
& + 0.125M_{BbAA}(i-1)F_{BbRa}(i-1) + 0.5M_{BbAA}(i-1)F_{BBaa}(i-1) \\
& + 0.25M_{BbAA}(i-1)(1-\Phi-\eta)F_{BBaa}(i-1) + 0.25M_{BbAA}(i-1)F_{BBRa}(i-1) \\
& + 0.125M_{BbAR}(i-1)F_{Bbaa}(i-1) + 0.0625M_{BbAR}(i-1)(1-\Phi-\eta)F_{Bbaa}(i-1) \\
& + 0.0625M_{BbAR}(i-1)F_{BbRa}(i-1) + 0.25M_{BbAR}(i-1)F_{BBaa}(i-1) \\
& + 0.125M_{BbAR}(i-1)(1-\Phi-\eta)F_{BBaa}(i-1) + 0.125M_{BbAR}(i-1)F_{BBRa}(i-1) \\
& + 0.25M_{BBaa}(i-1)(1-\Phi-\eta)F_{Bbaa}(i-1) + 0.5M_{BBaa}(i-1)\Phi F_{Bbaa}(i-1) \\
& + 0.25M_{BBaa}(i-1)\eta F_{Bbaa}(i-1) + 0.5M_{BBaa}(i-1)F_{Bbaa}(i-1) + 0.25M_{BBaa}(i-1)F_{BBAR}(i-1) \\
& + 0.5M_{BBaa}(i-1)(1-\Phi-\eta)F_{BBaa}(i-1) + M_{BBaa}(i-1)\Phi F_{BBaa}(i-1) \\
& + 0.5M_{BBaa}(i-1)\eta F_{BBaa}(i-1) + M_{BBaa}(i-1)F_{BBAA}(i-1) + 0.5M_{BBaa}(i-1)F_{BBAR}(i-1) \\
& + 0.25(1-\Phi-\eta)M_{BBaa}(i-1)F_{Bbaa}(i-1) + 0.5\Phi M_{BBaa}(i-1)F_{Bbaa}(i-1) \\
& + 0.25\eta M_{BBaa}(i-1)F_{Bbaa}(i-1) + 0.25(1-\Phi-\eta)M_{BBaa}(i-1)(1-\Phi-\eta)F_{Bbaa}(i-1) \\
& + 0.25\Phi M_{BBaa}(i-1)(1-\Phi-\eta)F_{Bbaa}(i-1) + 0.125\eta M_{BBaa}(i-1)(1-\Phi-\eta)F_{Bbaa}(i-1) \\
& + 0.25(1-\Phi-\eta)M_{BBaa}(i-1)\Phi F_{Bbaa}(i-1) + 0.125(1-\Phi-\eta)M_{BBaa}(i-1)\eta F_{Bbaa}(i-1) \\
& + 0.125(1-\Phi-\eta)M_{BBaa}(i-1)F_{BbRa}(i-1) + 0.25\Phi M_{BBaa}(i-1)F_{BbRa}(i-1) \\
& + 0.125\eta M_{BBaa}(i-1)F_{BbRa}(i-1) + 0.25(1-\Phi-\eta)M_{BBaa}(i-1)F_{Bbaa}(i-1) \\
& + 0.125(1-\Phi-\eta)M_{BBaa}(i-1)F_{BBAR}(i-1) + 0.5(1-\Phi-\eta)M_{BBaa}(i-1)F_{BBaa}(i-1) \\
& + \Phi M_{BBaa}(i-1)F_{BBaa}(i-1) + 0.5\eta M_{BBaa}(i-1)F_{BBaa}(i-1)
\end{aligned}$$

$$\begin{aligned}
& + 0.5(1 - \Phi - \eta)M_{BBaA}(i-1)(1 - \Phi - \eta)F_{BBaA}(i-1) + 0.5\Phi M_{BBaA}(i-1)(1 - \Phi - \eta)F_{BBaA}(i-1) \\
& + 0.25\eta M_{BBaA}(i-1)(1 - \Phi - \eta)F_{BBaA}(i-1) + 0.5(1 - \Phi - \eta)M_{BBaA}(i-1)\Phi F_{BBaA}(i-1) \\
& + 0.25(1 - \Phi - \eta)M_{BBaA}(i-1)\eta F_{BBaA}(i-1) + 0.25(1 - \Phi - \eta)M_{BBaA}(i-1)F_{BBRa}(i-1) \\
& + 0.5\Phi M_{BBaA}(i-1)F_{BBRa}(i-1) + 0.25\eta M_{BBaA}(i-1)F_{BBRa}(i-1) \\
& + 0.5(1 - \Phi - \eta)M_{BBaA}(i-1)F_{BBAA}(i-1) + 0.25(1 - \Phi - \eta)M_{BBaA}(i-1)F_{BBAR}(i-1) \\
& + 0.125M_{BBRa}(i-1)(1 - \Phi - \eta)F_{BbAa}(i-1) + 0.25M_{BBRa}(i-1)\Phi F_{BbAa}(i-1) \\
& + 0.125M_{BBRa}(i-1)\eta F_{BbAa}(i-1) + 0.25M_{BBRa}(i-1)F_{BBAA}(i-1) + 0.125M_{BBRa}(i-1)F_{BBAR}(i-1) \\
& + 0.25M_{BBRa}(i-1)(1 - \Phi - \eta)F_{BBaA}(i-1) + 0.5M_{BBRa}(i-1)\Phi F_{BBaA}(i-1) \\
& + 0.25M_{BBRa}(i-1)\eta F_{BBaA}(i-1) + 0.5M_{BBRa}(i-1)F_{BBAA}(i-1) + 0.25M_{BBRa}(i-1)F_{BBAR}(i-1) \\
& + 0.5M_{BBAA}(i-1)F_{Bbaa}(i-1) + 0.25M_{BBAA}(i-1)(1 - \Phi - \eta)F_{BbAa}(i-1) \\
& + 0.25M_{BBAA}(i-1)F_{BbRa}(i-1) + M_{BBAA}(i-1)F_{Bbaa}(i-1) + 0.5M_{BBAA}(i-1)(1 - \Phi - \eta)F_{BBaA}(i-1) \\
& + 0.5M_{BBAA}(i-1)F_{BBRa}(i-1) + 0.25M_{BBAR}(i-1)F_{Bbaa}(i-1) \\
& + 0.125M_{BBAR}(i-1)(1 - \Phi - \eta)F_{BbAa}(i-1) + 0.125M_{BBAR}(i-1)F_{BbRa}(i-1) \\
& + 0.5M_{BBAR}(i-1)F_{Bbaa}(i-1) + 0.25M_{BBAR}(i-1)(1 - \Phi - \eta)F_{BBaA}(i-1) \\
& + 0.25M_{BBAR}(i-1)F_{BBRa}(i-1)], \\
M_{BBRa}^e & = (\Omega_{BBRa}/2)[0.125M_{Bbaa}(i-1)\eta F_{BbAa}(i-1) + 0.125M_{Bbaa}(i-1)F_{BbRa}(i-1) \\
& + 0.125M_{Bbaa}(i-1)F_{BbAR}(i-1) + 0.25M_{Bbaa}(i-1)F_{BbRR}(i-1) + 0.25M_{Bbaa}(i-1)\eta F_{BBaA}(i-1) \\
& + 0.25M_{Bbaa}(i-1)F_{BBRa}(i-1) + 0.25M_{Bbaa}(i-1)F_{BBAR}(i-1) + 0.5M_{Bbaa}(i-1)F_{BBRR}(i-1) \\
& + 0.125\eta M_{BbAa}(i-1)F_{Bbaa}(i-1) + 0.0625\eta M_{BbAa}(i-1)(1 - \Phi - \eta)F_{BbAa}(i-1) \\
& + 0.0625(1 - \Phi - \eta)M_{BbAa}(i-1)\eta F_{BbAa}(i-1) + 0.0625(1 - \Phi - \eta)M_{BbAa}(i-1)F_{BbRa}(i-1) \\
& + 0.0625\eta M_{BbAa}(i-1)F_{BbRa}(i-1) + 0.0625(1 - \Phi - \eta)M_{BbAa}(i-1)F_{BbAR}(i-1) \\
& + 0.125(1 - \Phi - \eta)M_{BbAa}(i-1)F_{BbRR}(i-1) + 0.25\eta M_{BbAa}(i-1)F_{Bbaa}(i-1) \\
& + 0.125\eta M_{BbAa}(i-1)(1 - \Phi - \eta)F_{BBaA}(i-1) + 0.0625(1 - \Phi - \eta)M_{BbAa}(i-1)\eta F_{BBaA}(i-1) \\
& + 0.125(1 - \Phi - \eta)M_{BbAa}(i-1)F_{BBRa}(i-1) + 0.125\eta M_{BbAa}(i-1)F_{BBRa}(i-1) \\
& + 0.125(1 - \Phi - \eta)M_{BbAa}(i-1)F_{BBAR}(i-1) + 0.25(1 - \Phi - \eta)M_{BbAa}(i-1)F_{BBRR}(i-1) \\
& + 0.125M_{BbRa}(i-1)F_{Bbaa}(i-1) + 0.0625M_{BbRa}(i-1)(1 - \Phi - \eta)F_{BbAa}(i-1) \\
& + 0.0625M_{BbRa}(i-1)\eta F_{BbAa}(i-1) + 0.125M_{BbRa}(i-1)F_{BbRa}(i-1) + 0.0625M_{BbRa}(i-1)F_{BbAR}(i-1) \\
& + 0.125M_{BbRa}(i-1)F_{BbRR}(i-1) + 0.25M_{BbRa}(i-1)F_{BBaA}(i-1) \\
& + 0.125M_{BbRa}(i-1)(1 - \Phi - \eta)F_{BBaA}(i-1) + 0.125M_{BbRa}(i-1)\eta F_{BBaA}(i-1) \\
& + 0.25M_{BbRa}(i-1)F_{BBRa}(i-1) + 0.125M_{BbRa}(i-1)F_{BBAR}(i-1) + 0.25M_{BbRa}(i-1)F_{BBRR}(i-1) \\
& + 0.125M_{BbAR}(i-1)F_{Bbaa}(i-1) + 0.0625M_{BbAR}(i-1)(1 - \Phi - \eta)F_{BbAa}(i-1) \\
& + 0.0625M_{BbAR}(i-1)F_{BbRa}(i-1) + 0.25M_{BbAR}(i-1)F_{BBaA}(i-1) \\
& + 0.125M_{BbAR}(i-1)(1 - \Phi - \eta)F_{BBaA}(i-1) + 0.125M_{BbAR}(i-1)F_{BBRa}(i-1) \\
& + 0.25M_{BbRR}(i-1)F_{Bbaa}(i-1) + 0.125M_{BbRR}(i-1)(1 - \Phi - \eta)F_{BbAa}(i-1) \\
& + 0.125M_{BbRR}(i-1)F_{BbRa}(i-1) + 0.5M_{BbRR}(i-1)F_{BBaA}(i-1) \\
& + 0.25M_{BbRR}(i-1)(1 - \Phi - \eta)F_{BBaA}(i-1) + 0.25M_{BbRR}(i-1)F_{BBRa}(i-1) \\
& + 0.25M_{BBaa}(i-1)\eta F_{BbAa}(i-1) + 0.25M_{BBaa}(i-1)F_{BbRa}(i-1) + 0.25M_{BBaa}(i-1)F_{BbAR}(i-1) \\
& + 0.5M_{BBaa}(i-1)F_{BbRR}(i-1) + 0.5M_{BBaa}(i-1)\eta F_{BBaA}(i-1) + 0.5M_{BBaa}(i-1)F_{BBRa}(i-1) \\
& + 0.5M_{BBaa}(i-1)F_{BBAR}(i-1) + M_{BBaa}(i-1)F_{BBRR}(i-1) + 0.25\eta M_{BBaA}(i-1)F_{Bbaa}(i-1) \\
& + 0.125\eta M_{BBaA}(i-1)(1 - \Phi - \eta)F_{BbAa}(i-1) + 0.125(1 - \Phi - \eta)M_{BBaA}(i-1)\eta F_{BbAa}(i-1) \\
& + 0.125(1 - \Phi - \eta)M_{BBaA}(i-1)F_{BbRa}(i-1) + 0.125\eta M_{BBaA}(i-1)F_{BbRa}(i-1) \\
& + 0.125(1 - \Phi - \eta)M_{BBaA}(i-1)F_{BbAR}(i-1) + 0.25(1 - \Phi - \eta)M_{BBaA}(i-1)F_{BbRR}(i-1) \\
& + 0.5\eta M_{BBaA}(i-1)F_{Bbaa}(i-1) + 0.25\eta M_{BBaA}(i-1)(1 - \Phi - \eta)F_{BBaA}(i-1) \\
& + 0.25(1 - \Phi - \eta)M_{BBaA}(i-1)\eta F_{BBaA}(i-1) + 0.25(1 - \Phi - \eta)M_{BBaA}(i-1)F_{BBRa}(i-1) \\
& + 0.25\eta M_{BBaA}(i-1)F_{BBRa}(i-1) + 0.25(1 - \Phi - \eta)M_{BBaA}(i-1)F_{BBAR}(i-1) \\
& + 0.5(1 - \Phi - \eta)M_{BBaA}(i-1)F_{BBRR}(i-1) + 0.25M_{BBRa}(i-1)F_{Bbaa}(i-1) \\
& + 0.125M_{BBRa}(i-1)(1 - \Phi - \eta)F_{BbAa}(i-1) + 0.125M_{BBRa}(i-1)\eta F_{BbAa}(i-1)
\end{aligned}$$

$$\begin{aligned}
& + 0.25M_{BBRa}(i-1)F_{BbRa}(i-1) + 0.125M_{BBRa}(i-1)F_{BbAR}(i-1) + 0.25M_{BBRa}(i-1)F_{BbRR}(i-1) \\
& + 0.5M_{BBRa}(i-1)F_{BBaa}(i-1) + 0.25M_{BBRa}(i-1)(1-\Phi-\eta)F_{BBAA}(i-1) \\
& + 0.25M_{BBRa}(i-1)\eta F_{BBAA}(i-1) + 0.5M_{BBRa}(i-1)F_{BBRa}(i-1) + 0.25M_{BBRa}(i-1)F_{BBAR}(i-1) \\
& + 0.5M_{BBRa}(i-1)F_{BBRR}(i-1) + 0.25M_{BBAR}(i-1)F_{Bbaa}(i-1) \\
& + 0.125M_{BBAR}(i-1)(1-\Phi-\eta)F_{BbAa}(i-1) + 0.125M_{BBAR}(i-1)F_{BbRa}(i-1) \\
& + 0.5M_{BBAR}(i-1)F_{BBaa}(i-1) + 0.25M_{BBAR}(i-1)(1-\Phi-\eta)F_{BBAA}(i-1) \\
& + 0.25M_{BBAR}(i-1)F_{BBRa}(i-1) + 0.5M_{BBRR}(i-1)F_{Bbaa}(i-1) \\
& + 0.25M_{BBRR}(i-1)(1-\Phi-\eta)F_{BbAa}(i-1) + 0.25M_{BBRR}(i-1)F_{BbRa}(i-1) \\
& + M_{BBRR}(i-1)F_{BBaa}(i-1) + 0.5M_{BBRR}(i-1)(1-\Phi-\eta)F_{BBAA}(i-1) \\
& + 0.5M_{BBRR}(i-1)F_{BBRa}(i-1)], \\
M_{BBAA}^e & = \left( \frac{\Omega_{BBAA}}{2} \right) [0.0625(1-\Phi-\eta)M_{BbAa}(i-1)(1-\Phi-\eta) + 0.125\Phi M_{BbAa}(i-1)(1-\Phi-\eta)F_{BbAa}(i-1) \\
& + 0.0625\eta M_{BbAa}(i-1)(1-\Phi-\eta)F_{BbAa}(i-1) + 0.125(1-\Phi-\eta)M_{BbAa}(i-1)\Phi F_{BbAa}(i-1) \\
& + 0.0625(1-\Phi-\eta)M_{BbAa}(i-1)\eta F_{BbAa}(i-1) + 0.25\Phi M_{BbAa}(i-1)\Phi F_{BbAa}(i-1) \\
& + 0.125\Phi M_{BbAa}(i-1)\eta F_{BbAa}(i-1) + 0.125\eta M_{BbAa}(i-1)\Phi F_{BbAa}(i-1) \\
& + 0.0625\eta M_{BbAa}(i-1)\eta F_{BbAa}(i-1) + 0.125(1-\Phi-\eta)M_{BbAa}(i-1)F_{BbAA}(i-1) \\
& + 0.25\Phi M_{BbAa}(i-1)F_{BbAA}(i-1) + 0.125\eta M_{BbAa}(i-1)F_{BbAA}(i-1) \\
& + 0.0625(1-\Phi-\eta)M_{BbAa}(i-1)F_{BbAR}(i-1) + 0.125\Phi M_{BbAa}(i-1)F_{BbAR}(i-1) \\
& + 0.0625\eta M_{BbAa}(i-1)F_{BbAR}(i-1) + 0.125(1-\Phi-\eta)M_{BbAa}(i-1)(1-\Phi-\eta)F_{BBAA}(i-1) \\
& + 0.25\Phi M_{BbAa}(i-1)(1-\Phi-\eta)F_{BBAA}(i-1) + 0.125\eta M_{BbAa}(i-1)(1-\Phi-\eta)F_{BBAA}(i-1) \\
& + 0.125(1-\Phi-\eta)M_{BbAa}(i-1)\Phi F_{BBAA}(i-1) + 0.0625(1-\Phi-\eta)M_{BbAa}(i-1)\eta F_{BBAA}(i-1) \\
& + 0.5\Phi M_{BbAa}(i-1)\Phi F_{BBAA}(i-1) + 0.25\Phi M_{BbAa}(i-1)\eta F_{BBAA}(i-1) \\
& + 0.25\eta M_{BbAa}(i-1)\Phi F_{BBAA}(i-1) + 0.125\eta M_{BbAa}(i-1)\eta F_{BBAA}(i-1) \\
& + 0.25(1-\Phi-\eta)M_{BbAa}(i-1)F_{BBAA}(i-1) + 0.5\Phi M_{BbAa}(i-1)F_{BBAA}(i-1) \\
& + 0.25\eta M_{BbAa}(i-1)F_{BBAA}(i-1) + 0.125(1-\Phi-\eta)M_{BbAa}(i-1)F_{BBAR}(i-1) \\
& + 0.25\Phi M_{BbAa}(i-1)F_{BBAR}(i-1) + 0.125\eta M_{BbAa}(i-1)F_{BBAR}(i-1) \\
& + 0.125M_{BbAA}(i-1)(1-\Phi-\eta)F_{BbAa}(i-1) + 0.25M_{BbAA}(i-1)\Phi F_{BbAa}(i-1) \\
& + 0.125M_{BbAA}(i-1)\eta F_{BbAa}(i-1) + 0.25M_{BbAA}(i-1)F_{BbAA}(i-1) + 0.125M_{BbAA}(i-1)F_{BbAR}(i-1) \\
& + 0.25M_{BbAA}(i-1)(1-\Phi-\eta)F_{BBAA}(i-1) + 0.5M_{BbAA}(i-1)\Phi F_{BBAA}(i-1) \\
& + 0.25M_{BbAA}(i-1)\eta F_{BBAA}(i-1) + 0.5M_{BbAA}(i-1)F_{BBAA}(i-1) + 0.25M_{BbAA}(i-1)F_{BBAR}(i-1) \\
& + 0.0625M_{BbAR}(i-1)(1-\Phi-\eta)F_{BbAa}(i-1) + 0.125M_{BbAR}(i-1)\Phi F_{BbAa}(i-1) \\
& + 0.0625M_{BbAR}(i-1)\eta F_{BbAa}(i-1) + 0.125M_{BbAR}(i-1)F_{BbAA}(i-1) + 0.0625M_{BbAR}(i-1)F_{BbAR}(i-1) \\
& + 0.125M_{BbAR}(i-1)(1-\Phi-\eta)F_{BBAA}(i-1) + 0.25M_{BbAR}(i-1)\Phi F_{BBAA}(i-1) \\
& + 0.125M_{BbAR}(i-1)\eta F_{BBAA}(i-1) + 0.25M_{BbAR}(i-1)F_{BBAA}(i-1) + 0.125M_{BbAR}(i-1)F_{BBAR}(i-1) \\
& + 0.125(1-\Phi-\eta)M_{BBAA}(i-1)(1-\Phi-\eta)F_{BbAa}(i-1) + 0.25\Phi M_{BBAA}(i-1)(1-\Phi-\eta)F_{BbAa}(i-1) \\
& + 0.125\eta M_{BBAA}(i-1)(1-\Phi-\eta)F_{BbAa}(i-1)F_{BbAa}(i-1) + 0.25(1-\Phi-\eta)M_{BBAA}(i-1)\Phi F_{BbAa}(i-1) \\
& + 0.125(1-\Phi-\eta)M_{BBAA}(i-1)\eta F_{BbAa}(i-1) + 0.5\Phi M_{BBAA}(i-1)\Phi F_{BbAa}(i-1) \\
& + 0.25\Phi M_{BBAA}(i-1)\eta F_{BbAa}(i-1) + 0.25\eta M_{BBAA}(i-1)\Phi F_{BbAa}(i-1) \\
& + 0.125\eta M_{BBAA}(i-1)\eta F_{BbAa}(i-1) + 0.25(1-\Phi-\eta)M_{BBAA}(i-1)F_{BbAA}(i-1) \\
& + 0.5\Phi M_{BBAA}(i-1)F_{BbAA}(i-1) + 0.25\eta M_{BBAA}(i-1)F_{BbAA}(i-1) \\
& + 0.125(1-\Phi-\eta)M_{BBAA}(i-1)F_{BbAR}(i-1) + 0.25\Phi M_{BBAA}(i-1)F_{BbAR}(i-1) \\
& + 0.125\eta M_{BBAA}(i-1)F_{BbAR}(i-1) + 0.25(1-\Phi-\eta)M_{BBAA}(i-1)(1-\Phi-\eta)F_{BBAA}(i-1) \\
& + 0.5\Phi M_{BBAA}(i-1)(1-\Phi-\eta)F_{BBAA}(i-1) + 0.25\eta M_{BBAA}(i-1)(1-\Phi-\eta)F_{BBAA}(i-1) \\
& + 0.5(1-\Phi-\eta)M_{BBAA}(i-1)\Phi F_{BBAA}(i-1) + 0.25(1-\Phi-\eta)M_{BBAA}(i-1)\eta F_{BBAA}(i-1) \\
& + \Phi M_{BBAA}(i-1)\Phi F_{BBAA}(i-1) + 0.5\Phi M_{BBAA}(i-1)\eta F_{BBAA}(i-1) + 0.5\eta M_{BBAA}(i-1)\Phi F_{BBAA}(i-1) \\
& + 0.25\eta M_{BBAA}(i-1)\eta F_{BBAA}(i-1) + 0.5(1-\Phi-\eta)M_{BBAA}(i-1)F_{BBAA}(i-1) \\
& + \Phi M_{BBAA}(i-1)F_{BBAA}(i-1) + 0.5\eta M_{BBAA}(i-1)F_{BBAA}(i-1)
\end{aligned}$$

$$\begin{aligned}
& + 0.25(1 - \Phi - \eta)M_{BBAA}(i-1)F_{BBAR}(i-1) + 0.5\Phi M_{BBAA}(i-1)F_{BBAR}(i-1) \\
& + 0.25\eta M_{BBAA}(i-1)F_{BBAR}(i-1) + 0.25M_{BBAA}(i-1)(1 - \Phi - \eta)F_{BbAa}(i-1) \\
& + 0.5M_{BBAA}(i-1)\Phi F_{BbAa}(i-1) + 0.25M_{BBAA}(i-1)\eta F_{BbAa}(i-1) + 0.5M_{BBAA}(i-1)F_{BbAA}(i-1) \\
& + 0.25M_{BBAA}(i-1)F_{BbAR}(i-1) + 0.5M_{BBAA}(i-1)(1 - \Phi - \eta)F_{BbAa}(i-1) \\
& + M_{BBAA}(i-1)\Phi F_{BbAa}(i-1) + 0.5M_{BBAA}(i-1)\eta F_{BbAa}(i-1) + M_{BBAA}(i-1)F_{BbAA}(i-1) \\
& + 0.5M_{BBAA}(i-1)F_{BBAR}(i-1) + 0.125M_{BBAR}(i-1)(1 - \Phi - \eta)F_{BbAa}(i-1) \\
& + 0.25M_{BBAR}(i-1)\Phi F_{BbAa}(i-1) + 0.125M_{BBAR}(i-1)\eta F_{BbAa}(i-1) + 0.25M_{BBAR}(i-1)F_{BbAA}(i-1) \\
& + 0.125M_{BBAR}(i-1)F_{BbAR}(i-1) + 0.25M_{BBAR}(i-1)(1 - \Phi - \eta)F_{BbAa}(i-1) \\
& + 0.5M_{BBAR}(i-1)\Phi F_{BbAa}(i-1) + 0.25M_{BBAR}(i-1)\eta F_{BbAa}(i-1) + 0.5M_{BBAR}(i-1)F_{BbAA}(i-1) \\
& + 0.25M_{BBAR}(i-1)F_{BBAR}(i-1)], \\
M_{BBAR}^e = & \left( \frac{\Omega_{BBAR}}{2} \right) [0.0625\eta M_{BbAa}(i-1)(1 - \Phi - \eta)F_{BbAa}(i-1) + 0.0625(1 - \Phi - \eta)M_{BbAa}(i-1)\eta F_{BbAa}(i-1) \\
& + 0.125\Phi M_{BbAa}(i-1)\eta F_{BbAa}(i-1) + 0.125\eta M_{BbAa}(i-1)\Phi F_{BbAa}(i-1) \\
& + 0.125\eta M_{BbAa}(i-1)\eta F_{BbAa}(i-1) + 0.0625(1 - \Phi - \eta)M_{BbAa}(i-1)F_{BbRa}(i-1) \\
& + 0.125\Phi M_{BbAa}(i-1)F_{BbRa}(i-1) + 0.0625\eta M_{BbAa}(i-1)F_{BbRa}(i-1) + 0.125\eta M_{BbAa}(i-1)F_{BbAA}(i-1) \\
& + 0.0625(1 - \Phi - \eta)M_{BbAa}(i-1)F_{BbAR}(i-1) + 0.125\Phi M_{BbAa}(i-1)F_{BbAR}(i-1) \\
& + 0.125\eta M_{BbAa}(i-1)F_{BbAR}(i-1) + 0.125(1 - \Phi - \eta)M_{BbAa}(i-1)F_{BbRR}(i-1) \\
& + 0.25\Phi M_{BbAa}(i-1)F_{BbRR}(i-1) + 0.125\eta M_{BbAa}(i-1)F_{BbRR}(i-1) \\
& + 0.125\eta M_{BbAa}(i-1)(1 - \Phi - \eta)F_{BbAa}(i-1) + 0.0625(1 - \Phi - \eta)M_{BbAa}(i-1)\eta F_{BBAA}(i-1) \\
& + 0.25\Phi M_{BbAa}(i-1)\eta F_{BBAA}(i-1) + 0.25\eta M_{BbAa}(i-1)\Phi F_{BBAA}(i-1) + 0.25\eta M_{BbAa}(i-1)\eta F_{BBAA}(i-1) \\
& + 0.125(1 - \Phi - \eta)M_{BbAa}(i-1)F_{BBRa}(i-1) + 0.25\Phi M_{BbAa}(i-1)F_{BBRa}(i-1) \\
& + 0.125\eta M_{BbAa}(i-1)F_{BBRa}(i-1) + 0.25\eta M_{BbAa}(i-1)F_{BBAA}(i-1) \\
& + 0.125(1 - \Phi - \eta)M_{BbAa}(i-1)F_{BBAR}(i-1) + 0.25\Phi M_{BbAa}(i-1)F_{BBAR}(i-1) \\
& + 0.25\eta M_{BbAa}(i-1)F_{BBAR}(i-1) + 0.25(1 - \Phi - \eta)M_{BbAa}(i-1)F_{BBRR}(i-1) \\
& + 0.5\Phi M_{BbAa}(i-1)F_{BBRR}(i-1) + 0.25\eta M_{BbAa}(i-1)F_{BBRR}(i-1) \\
& + 0.0625M_{BbRa}(i-1)(1 - \Phi - \eta)F_{BbAa}(i-1) + 0.125M_{BbRa}(i-1)\Phi F_{BbAa}(i-1) \\
& + 0.0625M_{BbRa}(i-1)\eta F_{BbAa}(i-1) + 0.125M_{BbRa}(i-1)F_{BbAA}(i-1) + 0.0625M_{BbRa}(i-1)F_{BbAR}(i-1) \\
& + 0.125M_{BbRa}(i-1)(1 - \Phi - \eta)F_{BBAA}(i-1) + 0.25M_{BbRa}(i-1)\Phi F_{BBAA}(i-1) \\
& + 0.125M_{BbRa}(i-1)\eta F_{BBAA}(i-1) + 0.25M_{BbRa}(i-1)F_{BBAA}(i-1) + 0.125M_{BbRa}(i-1)F_{BBAR}(i-1) \\
& + 0.125M_{BbAA}(i-1)\eta F_{BbAa}(i-1) + 0.125M_{BbAA}(i-1)F_{BbRa}(i-1) + 0.125M_{BbAA}(i-1)F_{BbAR}(i-1) \\
& + 0.25M_{BbAA}(i-1)F_{BbRR}(i-1) + 0.25M_{BbAA}(i-1)\eta F_{BBAA}(i-1) + 0.25M_{BbAA}(i-1)F_{BBRa}(i-1) \\
& + 0.25M_{BbAA}(i-1)F_{BBAR}(i-1) + 0.5M_{BbAA}(i-1)F_{BBRR}(i-1) \\
& + 0.0625M_{BbAR}(i-1)(1 - \Phi - \eta)F_{BbAa}(i-1) + 0.125M_{BbAR}(i-1)\Phi F_{BbAa}(i-1) \\
& + 0.125M_{BbAR}(i-1)\eta F_{BbAa}(i-1) + 0.0625M_{BbAR}(i-1)F_{BbRa}(i-1) + 0.125M_{BbAR}(i-1)F_{BbAA}(i-1) \\
& + 0.125M_{BbAR}(i-1)F_{BbAR}(i-1) + 0.125M_{BbAR}(i-1)F_{BbRR}(i-1) \\
& + 0.125M_{BbAR}(i-1)(1 - \Phi - \eta)F_{BBAA}(i-1) + 0.25M_{BbAR}(i-1)\Phi F_{BBAA}(i-1) \\
& + 0.25M_{BbAR}(i-1)\eta F_{BBAA}(i-1) + 0.125M_{BbAR}(i-1)F_{BBRa}(i-1) + 0.25M_{BbAR}(i-1)F_{BBAA}(i-1) \\
& + 0.25M_{BbAR}(i-1)F_{BBAR}(i-1) + 0.25M_{BbAR}(i-1)F_{BBRR}(i-1) \\
& + 0.125M_{BbRR}(i-1)(1 - \Phi - \eta)F_{BbAa}(i-1) + 0.25M_{BbRR}(i-1)\Phi F_{BbAa}(i-1) \\
& + 0.125M_{BbRR}(i-1)\eta F_{BbAa}(i-1) + 0.25M_{BbRR}(i-1)F_{BbAA}(i-1) + 0.125M_{BbRR}(i-1)F_{BbAR}(i-1) \\
& + 0.25M_{BbRR}(i-1)(1 - \Phi - \eta)F_{BBAA}(i-1) + 0.5M_{BbRR}(i-1)\Phi F_{BBAA}(i-1) \\
& + 0.25M_{BbRR}(i-1)\eta F_{BBAA}(i-1) + 0.5M_{BbRR}(i-1)F_{BBAA}(i-1) + 0.25M_{BbRR}(i-1)F_{BBAR}(i-1) \\
& + 0.125\eta M_{BbAA}(i-1)(1 - \Phi - \eta)F_{BbAa}(i-1) + 0.125(1 - \Phi - \eta)M_{BbAA}(i-1)\eta F_{BbAa}(i-1) \\
& + 0.25\Phi M_{BbAA}(i-1)\eta F_{BbAa}(i-1) + 0.25\eta M_{BbAA}(i-1)\Phi F_{BbAa}(i-1) + 0.25\eta M_{BbAA}(i-1)\eta F_{BbAa}(i-1) \\
& + 0.125(1 - \Phi - \eta)M_{BbAA}(i-1)F_{BbRa}(i-1) + 0.25\Phi M_{BbAA}(i-1)F_{BbRa}(i-1) \\
& + 0.125\eta M_{BbAA}(i-1)F_{BbRa}(i-1) + 0.25\eta M_{BbAA}(i-1)F_{BbAA}(i-1) \\
& + 0.125(1 - \Phi - \eta)M_{BbAA}(i-1)F_{BbAR}(i-1) + 0.25\Phi M_{BbAA}(i-1)F_{BbAR}(i-1)
\end{aligned}$$



$$\begin{aligned}
& + 0.25\eta M_{BBaA}(i-1)F_{BbAR}(i-1) + 0.25(1-\Phi-\eta)M_{BBaA}(i-1)F_{BbRR}(i-1) \\
& + 0.5\Phi M_{BBaA}(i-1)F_{BbRR}(i-1) + 0.25\eta M_{BBaA}(i-1)F_{BbRR}(i-1) \\
& + 0.25\eta M_{BBaA}(i-1)(1-\Phi-\eta)F_{BBaA}(i-1) + 0.25(1-\Phi-\eta)M_{BBaA}(i-1)\eta F_{BBaA}(i-1) \\
& + 0.5\Phi M_{BBaA}(i-1)\eta F_{BBaA}(i-1) + 0.5\eta M_{BBaA}(i-1)\Phi F_{BBaA}(i-1) + 0.5\eta M_{BBaA}(i-1)\eta F_{BBaA}(i-1) \\
& + 0.25(1-\Phi-\eta)M_{BBaA}(i-1)F_{BBRa}(i-1) + 0.5\Phi M_{BBaA}(i-1)F_{BBRa}(i-1) \\
& + 0.25\eta M_{BBaA}(i-1)F_{BBRa}(i-1) + 0.5\eta M_{BBaA}(i-1)F_{BBAA}(i-1) \\
& + 0.25(1-\Phi-\eta)M_{BBaA}(i-1)F_{BBAR}(i-1) + 0.5\Phi M_{BBaA}(i-1)F_{BBAR}(i-1) \\
& + 0.5\eta M_{BBaA}(i-1)F_{BBAR}(i-1) + 0.5(1-\Phi-\eta)M_{BBaA}(i-1)F_{BBRR}(i-1) \\
& + \Phi M_{BBaA}(i-1)F_{BBRR}(i-1) + 0.5\eta M_{BBaA}(i-1)F_{BBRR}(i-1) \\
& + 0.125M_{BBRa}(i-1)(1-\Phi-\eta)F_{BbAa}(i-1) + 0.25M_{BBRa}(i-1)\Phi F_{BbAa}(i-1) \\
& + 0.125M_{BBRa}(i-1)\eta F_{BbAa}(i-1) + 0.25M_{BBRa}(i-1)F_{BbAA}(i-1) + 0.125M_{BBRa}(i-1)F_{BbAR}(i-1) \\
& + 0.25M_{BBRa}(i-1)(1-\Phi-\eta)F_{BBaA}(i-1) + 0.5M_{BBRa}(i-1)\Phi F_{BBaA}(i-1) \\
& + 0.25M_{BBRa}(i-1)\eta F_{BBaA}(i-1) + 0.5M_{BBRa}(i-1)F_{BBAA}(i-1) + 0.25M_{BBRa}(i-1)F_{BBAR}(i-1) \\
& + 0.25M_{BBAA}(i-1)\eta F_{BbAa}(i-1) + 0.25M_{BBAA}(i-1)F_{BbRa}(i-1) + 0.25M_{BBAA}(i-1)F_{BbAR}(i-1) \\
& + 0.5M_{BBAA}(i-1)F_{BbRR}(i-1) + 0.5M_{BBAA}(i-1)\eta F_{BBaA}(i-1) + 0.5M_{BBAA}(i-1)F_{BBRa}(i-1) \\
& + 0.5M_{BBAA}(i-1)F_{BBAR}(i-1) + M_{BBAA}(i-1)F_{BBRR}(i-1) \\
& + 0.125M_{BBAR}(i-1)(1-\Phi-\eta)F_{BbAa}(i-1) + 0.25M_{BBAR}(i-1)\Phi F_{BbAa}(i-1) \\
& + 0.25M_{BBAR}(i-1)\eta F_{BbAa}(i-1) + 0.125M_{BBAR}(i-1)F_{BbRa}(i-1) + 0.25M_{BBAR}(i-1)F_{BbAA}(i-1) \\
& + 0.25M_{BBAR}(i-1)F_{BbAR}(i-1) + 0.25M_{BBAR}(i-1)F_{BbRR}(i-1) \\
& + 0.25M_{BBAR}(i-1)(1-\Phi-\eta)F_{BBaA}(i-1) + 0.5M_{BBAR}(i-1)\Phi F_{BBaA}(i-1) \\
& + 0.5M_{BBAR}(i-1)\eta F_{BBaA}(i-1) + 0.25M_{BBAR}(i-1)F_{BBRa}(i-1) + 0.5M_{BBAR}(i-1)F_{BBAA}(i-1) \\
& + 0.5M_{BBAR}(i-1)F_{BBAR}(i-1) + 0.5M_{BBAR}(i-1)F_{BBRR}(i-1) \\
& + 0.25M_{BBRR}(i-1)(1-\Phi-\eta)F_{BbAa}(i-1) + 0.5M_{BBRR}(i-1)\Phi F_{BbAa}(i-1) \\
& + 0.25M_{BBRR}(i-1)\eta F_{BbAa}(i-1) + 0.5M_{BBRR}(i-1)F_{BbAA}(i-1) + 0.25M_{BBRR}(i-1)F_{BbAR}(i-1) \\
& + 0.5M_{BBRR}(i-1)(1-\Phi-\eta)F_{BBaA}(i-1) + M_{BBRR}(i-1)\Phi F_{BBaA}(i-1) \\
& + 0.5M_{BBRR}(i-1)\eta F_{BBaA}(i-1) + M_{BBRR}(i-1)F_{BBAA}(i-1) + 0.5M_{BBRR}(i-1)F_{BBAR}(i-1)], \\
M_{BBRR}^e & = \left(\frac{\Omega_{BBRR}}{2}\right) [0.0625\eta M_{BbAa}(i-1)\eta F_{BbAa}(i-1) + 0.0625\eta M_{BbAa}(i-1)F_{BbRa}(i-1) \\
& + 0.0625\eta M_{BbAa}(i-1)F_{BbAR}(i-1) + 0.125\eta M_{BbAa}(i-1)F_{BbRR}(i-1) \\
& + 0.125\eta M_{BbAa}(i-1)\eta F_{BBaA}(i-1) + 0.125\eta M_{BbAa}(i-1)F_{BBRa}(i-1) \\
& + 0.125\eta M_{BbAa}(i-1)F_{BBAR}(i-1) + 0.25\eta M_{BbAa}(i-1)F_{BBRR}(i-1) + 0.0625M_{BbRa}(i-1)\eta F_{BbAa}(i-1) \\
& + 0.0625M_{BbRa}(i-1)F_{BbRa}(i-1) + 0.0625M_{BbRa}(i-1)F_{BbAR}(i-1) + 0.125M_{BbRa}(i-1)F_{BbRR}(i-1) \\
& + 0.125M_{BbRa}(i-1)\eta F_{BBaA}(i-1) + 0.125M_{BbRa}(i-1)F_{BBRa}(i-1) + 0.125M_{BbRa}(i-1)F_{BBAR}(i-1) \\
& + 0.25M_{BbRa}(i-1)F_{BBRR}(i-1) + 0.0625M_{BbAR}(i-1)\eta F_{BbAa}(i-1) + 0.0625M_{BbAR}(i-1)F_{BbRa}(i-1) \\
& + 0.0625M_{BbAR}(i-1)F_{BbAR}(i-1) + 0.125M_{BbAR}(i-1)F_{BbRR}(i-1) + 0.125M_{BbAR}(i-1)\eta F_{BBaA}(i-1) \\
& + 0.125M_{BbAR}(i-1)F_{BBRa}(i-1) + 0.125M_{BbAR}(i-1)F_{BBAR}(i-1) + 0.25M_{BbAR}(i-1)F_{BBRR}(i-1) \\
& + 0.125M_{BbRR}(i-1)\eta F_{BbAa}(i-1) + 0.125M_{BbRR}(i-1)F_{BbRa}(i-1) + 0.125M_{BbRR}(i-1)F_{BbAR}(i-1) \\
& + 0.25M_{BbRR}(i-1)F_{BbRR}(i-1) + 0.25M_{BbRR}(i-1)\eta F_{BBaA}(i-1) + 0.25M_{BbRR}(i-1)F_{BBRa}(i-1) \\
& + 0.25M_{BbRR}(i-1)F_{BBAR}(i-1) + 0.5M_{BbRR}(i-1)F_{BBRR}(i-1) + 0.125\eta M_{BBaA}(i-1)\eta F_{BbAa}(i-1) \\
& + 0.125\eta M_{BBaA}(i-1)F_{BbRa}(i-1) + 0.125\eta M_{BBaA}(i-1)F_{BbAR}(i-1) + 0.25\eta M_{BBaA}(i-1)F_{BbRR}(i-1) \\
& + 0.25\eta M_{BBaA}(i-1)\eta F_{BBaA}(i-1) + 0.25\eta M_{BBaA}(i-1)F_{BBRa}(i-1) + 0.25\eta M_{BBaA}(i-1)F_{BBAR}(i-1) \\
& + 0.5\eta M_{BBaA}(i-1)F_{BBRR}(i-1) + 0.125M_{BBRa}(i-1)\eta F_{BbAa}(i-1) + 0.125M_{BBRa}(i-1)F_{BbRa}(i-1) \\
& + 0.125M_{BBRa}(i-1)F_{BbAR}(i-1) + 0.25M_{BBRa}(i-1)F_{BbRR}(i-1) + 0.25M_{BBRa}(i-1)\eta F_{BBaA}(i-1) \\
& + 0.25M_{BBRa}(i-1)F_{BBRa}(i-1) + 0.25M_{BBRa}(i-1)F_{BBAR}(i-1) + 0.5M_{BBRa}(i-1)F_{BBRR}(i-1) \\
& + 0.125M_{BBAR}(i-1)\eta F_{BbAa}(i-1) + 0.125M_{BBAR}(i-1)F_{BbRa}(i-1) + 0.125M_{BBAR}(i-1)F_{BbAR}(i-1) \\
& + 0.25M_{BBAR}(i-1)F_{BbRR}(i-1) + 0.25M_{BBAR}(i-1)\eta F_{BBaA}(i-1) + 0.25M_{BBAR}(i-1)F_{BBRa}(i-1) \\
& + 0.25M_{BBAR}(i-1)F_{BBAR}(i-1) + 0.5M_{BBAR}(i-1)F_{BBRR}(i-1) + 0.25M_{BBRR}(i-1)\eta F_{BbAa}(i-1)
\end{aligned}$$

$$\begin{aligned}
& + 0.25M_{BBRR}(i-1)F_{BbRa}(i-1) + 0.25M_{BBRR}(i-1)F_{BbAR}(i-1) + 0.5M_{BBRR}(i-1)F_{BbRR}(i-1) \\
& + 0.5M_{BBRR}(i-1)\eta F_{BBAA}(i-1) + 0.5M_{BBRR}(i-1)F_{BBRa}(i-1) + 0.5M_{BBRR}(i-1)F_{BBAR}(i-1) \\
& + M_{BBRR}(i-1)F_{BBRR}(i-1)],
\end{aligned}$$

and a matching set of equations for females of each genotype.

The second stage is to normalise these proportional frequencies to fill the range from zero to one. We begin by calculating the overall fitness of the entire population by summing the proportional genotype frequencies resulting from the above equations to give:

$$\begin{aligned}
\bar{\Omega} = & M_{bbaa}^e + M_{bbAa}^e + M_{bbRa}^e + M_{bbAA}^e + M_{bbAR}^e + M_{bbRR}^e + M_{Bbaa}^e + M_{BbAa}^e + M_{BbRa}^e \\
& + M_{BbAA}^e + M_{BbAR}^e + M_{BbRR}^e + M_{BBaa}^e + M_{BBAA}^e + M_{BBRa}^e + M_{BBAA}^e + M_{BBAR}^e + M_{BBRR}^e \\
& + F_{bbaa}^e + F_{bbAa}^e + F_{bbRa}^e + F_{bbAA}^e + F_{bbAR}^e + F_{bbRR}^e + F_{Bbaa}^e + F_{BbAa}^e + F_{BbRa}^e \\
& + F_{BbAA}^e + F_{BbAR}^e + F_{BbRR}^e + F_{BBaa}^e + F_{BBAA}^e + F_{BBRa}^e + F_{BBAA}^e + F_{BBAR}^e + F_{BBRR}^e.
\end{aligned}$$

This is used as a normalising factor to give the final genotype frequencies for a particular generation as:

$$\begin{aligned}
M_{bbaa}(i) &= M_{bbaa}^e/\bar{\Omega}, & M_{bbAa}(i) &= M_{bbAa}^e, & M_{bbRa}(i) &= M_{bbRa}^e/\bar{\Omega}, & M_{bbAA}(i) &= M_{bbAA}^e/\bar{\Omega}, \\
M_{bbAR}(i) &= M_{bbAR}^e/\bar{\Omega}, & M_{bbRR}(i) &= M_{bbRR}^e/\bar{\Omega}, & M_{Bbaa}(i) &= M_{Bbaa}^e/\bar{\Omega}, & M_{BbAa}(i) &= M_{BbAa}^e/\bar{\Omega}, \\
M_{BbRa}(i) &= M_{BbRa}^e/\bar{\Omega}, & M_{BbAA}(i) &= M_{BbAA}^e/\bar{\Omega}, & M_{BbAR}(i) &= M_{BbAR}^e/\bar{\Omega}, & M_{BbRR}(i) &= M_{BbRR}^e/\bar{\Omega}, \\
M_{BBaa}(i) &= M_{BBaa}^e/\bar{\Omega}, & M_{BBAA}(i) &= M_{BBAA}^e/\bar{\Omega}, & M_{BBRa}(i) &= M_{BBRa}^e/\bar{\Omega}, & M_{BBAA}(i) &= M_{BBAA}^e/\bar{\Omega}, \\
M_{BBAR}(i) &= M_{BBAR}^e/\bar{\Omega}, & M_{BBRR}(i) &= M_{BBRR}^e/\bar{\Omega}, & F_{bbaa}(i) &= F_{bbaa}^e/\bar{\Omega}, & F_{bbAa}(i) &= F_{bbAa}^e/\bar{\Omega}, \\
F_{bbRa}(i) &= F_{bbRa}^e/\bar{\Omega}, & F_{bbAA}(i) &= F_{bbAA}^e/\bar{\Omega}, & F_{bbAR}(i) &= F_{bbAR}^e/\bar{\Omega}, & F_{bbRR}(i) &= F_{bbRR}^e/\bar{\Omega}, \\
F_{Bbaa}(i) &= F_{Bbaa}^e/\bar{\Omega}, & F_{BbAa}(i) &= F_{BbAa}^e/\bar{\Omega}, & F_{BbRa}(i) &= F_{BbRa}^e/\bar{\Omega}, & F_{BbAA}(i) &= F_{BbAA}^e/\bar{\Omega}, \\
F_{BbAR}(i) &= F_{BbAR}^e/\bar{\Omega}, & F_{BbRR}(i) &= F_{BbRR}^e/\bar{\Omega}, & F_{BBaa}(i) &= F_{BBaa}^e/\bar{\Omega}, & F_{BBAA}(i) &= F_{BBAA}^e/\bar{\Omega}, \\
F_{BBRa}(i) &= F_{BBRa}^e/\bar{\Omega}, & F_{BBAA}(i) &= F_{BBAA}^e/\bar{\Omega}, & F_{BBAR}(i) &= F_{BBAR}^e/\bar{\Omega}, & F_{BBRR}(i) &= F_{BBRR}^e/\bar{\Omega}.
\end{aligned}$$

We then insert these values into the proportional genotype frequency equations to calculate the values for the next generation and so on until the desired end point is reached.
