# Supplementary material for: Split drive killer-rescue provides a novel threshold-dependent gene drive
Source: PubMed Central journal article supplement (PMC7689494; doi:10.1038/s41598-020-77544-7), 2020-11-25
Supplement: 41598_2020_77544_MOESM4_ESM.pdf [file 41598_2020_77544_MOESM4_ESM.pdf]

# Split drive killer-rescue provides a novel threshold-dependent gene drive

Matthew P. Edgington<sup>1\*</sup>, Tim Harvey-Samuel<sup>1</sup> and Luke Alphey<sup>1</sup>

<sup>1</sup>The Pirbright Institute, Ash Road, Woking, Surrey GU24 0NF, UK

\*Corresponding author: matt.edgington@pirbright.ac.uk

## Supplementary Model 4

We begin by defining a base parameter set for use throughout this study. This is as follows:

- $L = 1$  (full lethal penetrance),
- $\varepsilon_A = 0.85$  (relative to 1 in wild-type individuals - 15% fitness cost),
- $\varepsilon_B = 0.85$  (relative to 1 in wild-type individuals - 15% fitness cost),
- $\varepsilon_C = 0.85$  (relative to 1 in wild-type individuals - 15% fitness cost),
- $\Phi = 0.9$  (90% homing rate).

The relative fitness parameters above are then combined multiplicatively to obtain a single overall relative fitness value for individuals of each genotype (assumed equal for both sexes). These are of the form:

$$\begin{aligned} \Omega_{ccbbaa} &= 1, & \Omega_{ccbbAa} &= (1-L)\varepsilon_A, & \Omega_{ccbbAA} &= (1-L)\varepsilon_A^2, & \Omega_{ccBbaa} &= \varepsilon_B, & \Omega_{ccBbAa} &= \varepsilon_B\varepsilon_A, \\ \Omega_{ccBbAA} &= \varepsilon_B\varepsilon_A^2, & \Omega_{ccBBaa} &= \varepsilon_B^2, & \Omega_{ccBBAa} &= \varepsilon_B^2\varepsilon_A, & \Omega_{ccBBAA} &= \varepsilon_B^2\varepsilon_A^2, & \Omega_{Ccbbaa} &= \varepsilon_C, \\ \Omega_{CcbbAa} &= (1-L)\varepsilon_C\varepsilon_A, & \Omega_{CcbbAA} &= (1-L)\varepsilon_C\varepsilon_A^2, & \Omega_{CcBbaa} &= \varepsilon_C\varepsilon_B, & \Omega_{CcBbAa} &= \varepsilon_C\varepsilon_B\varepsilon_A, & \Omega_{CcBbAA} &= \varepsilon_C\varepsilon_B\varepsilon_A^2, \\ \Omega_{CcBBaa} &= \varepsilon_C\varepsilon_B^2, & \Omega_{CcBBAa} &= \varepsilon_C\varepsilon_B^2\varepsilon_A, & \Omega_{CcBBAA} &= \varepsilon_C\varepsilon_B^2\varepsilon_A^2, & \Omega_{CCbbaa} &= \varepsilon_C^2, & \Omega_{CCbbAa} &= (1-L)\varepsilon_C^2\varepsilon_A, \\ \Omega_{CCbbAA} &= (1-L)\varepsilon_C^2\varepsilon_A^2, & \Omega_{CCBbaa} &= \varepsilon_C^2\varepsilon_B, & \Omega_{CCBbAa} &= \varepsilon_C^2\varepsilon_B\varepsilon_A, & \Omega_{CCBbAA} &= \varepsilon_C^2\varepsilon_B\varepsilon_A^2, & \Omega_{CCBBaa} &= \varepsilon_C^2\varepsilon_B^2, \\ \Omega_{CCBBAa} &= \varepsilon_C^2\varepsilon_B^2\varepsilon_A, & \Omega_{CCBBAA} &= \varepsilon_C^2\varepsilon_B^2\varepsilon_A^2. \end{aligned}$$

We then define a set of initial conditions representing the genotype proportions in the population at the point of releasing transgenic individuals. For a 1:1 (introduced:wild) release of individuals homozygous for all transgenic constructs, as is most widely considered in this study these are of the form:

$$\begin{aligned} M_{ccbbaa}(1) &= 0.25 = F_{ccbbaa}(1), & M_{ccbbAa}(1) &= 0.00 = F_{ccbbAa}(1), & M_{ccbbAA}(1) &= 0.00 = F_{ccbbAA}(1), \\ M_{ccBbaa}(1) &= 0.00 = F_{ccBbaa}(1), & M_{ccBbAa}(1) &= 0.00 = F_{ccBbAa}(1), & M_{ccBbAA}(1) &= 0.00 = F_{ccBbAA}(1), \\ M_{ccBBaa}(1) &= 0.00 = F_{ccBBaa}(1), & M_{ccBBAa}(1) &= 0.00 = F_{ccBBAa}(1), & M_{ccBBAA}(1) &= 0.00 = F_{ccBBAA}(1), \\ M_{Ccbbaa}(1) &= 0.25 = F_{Ccbbaa}(1), & M_{CcbbAa}(1) &= 0.00 = F_{CcbbAa}(1), & M_{CcbbAA}(1) &= 0.00 = F_{CcbbAA}(1), \\ M_{CcBbaa}(1) &= 0.00 = F_{CcBbaa}(1), & M_{CcBbAa}(1) &= 0.00 = F_{CcBbAa}(1), & M_{CcBbAA}(1) &= 0.00 = F_{CcBbAA}(1), \\ M_{CcBBaa}(1) &= 0.00 = F_{CcBBaa}(1), & M_{CcBBAa}(1) &= 0.00 = F_{CcBBAa}(1), & M_{CcBBAA}(1) &= 0.00 = F_{CcBBAA}(1), \\ M_{CCbbaa}(1) &= 0.25 = F_{CCbbaa}(1), & M_{CCbbAa}(1) &= 0.00 = F_{CCbbAa}(1), & M_{CCbbAA}(1) &= 0.00 = F_{CCbbAA}(1), \\ M_{CCBbaa}(1) &= 0.00 = F_{CCBbaa}(1), & M_{CCBbAa}(1) &= 0.00 = F_{CCBbAa}(1), & M_{CCBbAA}(1) &= 0.00 = F_{CCBbAA}(1), \\ M_{CCBBaa}(1) &= 0.00 = F_{CCBBaa}(1), & M_{CCBBAa}(1) &= 0.00 = F_{CCBBAa}(1), & M_{CCBBAA}(1) &= 0.25 = F_{CCBBAA}(1). \end{aligned}$$

With the above definitions then iteratively calculate the genotype frequencies in each subsequent generation. This process is conducted in a two step manner. The first stage is to calculate the proportional frequencies for each genotype (and for each sex), which is achieved using:













$$\begin{aligned} & 1)F_{C_cbbaa}(i-1) + 0.125\Phi M_{C_cBBAA}(i-1)F_{C_cbbAa}(i-1) + 0.125\Phi M_{C_cBBAA}(i-1)(1-\Phi)F_{C_cBbaa}(i-1) + \\ & 0.0625\Phi M_{C_cBBAA}(i-1)(1-\Phi)(1-\Phi)F_{C_cBbAa}(i-1) + 0.5M_{C_cBBAA}(i-1)F_{c_cbbAa}(i-1) + 0.25M_{C_cBBAA}(i-1) \\ & F_{c_cbbAa}(i-1) + 0.25M_{C_cBBAA}(i-1)F_{C_cBbaa}(i-1) + 0.125M_{C_cBBAA}(i-1)(1-\Phi)F_{c_cBbAa}(i-1) + \\ & 0.25M_{C_cBBAA}(i-1)F_{C_cbbAa}(i-1) + 0.125M_{C_cBBAA}(i-1)F_{C_cbbAa}(i-1) + 0.125M_{C_cBBAA}(i-1)(1-\Phi) \\ & \Phi F_{C_cBbaa}(i-1) + 0.0625M_{C_cBBAA}(i-1)(1-\Phi)(1-\Phi)F_{C_cBbAa}(i-1)], \end{aligned}$$

$$\begin{aligned} M_{c_cBbAA}^e &= \left( \frac{\bar{\Omega}_{c_cBbAA}}{2} \right) [0.125M_{c_cbbAa}(i-1)(1-\Phi)F_{c_cBbAa}(i-1) + 0.25M_{c_cbbAa}(i-1)\Phi F_{c_cBbAa}(i-1) + \\ & 0.25M_{c_cbbAa}(i-1)F_{c_cBbAA}(i-1) + 0.25M_{c_cbbAa}(i-1)(1-\Phi)F_{c_cBBAA}(i-1) + 0.5M_{c_cbbAa}(i-1)\Phi F_{c_cBBAA}(i-1) \\ & + 0.5M_{c_cbbAa}(i-1)F_{c_cBBAA}(i-1) + 0.0625M_{c_cbbAa}(i-1)(1-\Phi)(1-\Phi)F_{C_cBbAa}(i-1) + 0.125M_{c_cbbAa}(i-1) \\ & \Phi(1-\Phi)F_{C_cBbAa}(i-1) + 0.125M_{c_cbbAa}(i-1)(1-\Phi)\Phi F_{C_cBbAa}(i-1) + 0.25M_{c_cbbAa}(i-1)\Phi F_{C_cBbAa}(i-1) \\ & + 0.125M_{c_cbbAa}(i-1)(1-\Phi)F_{C_cBbAA}(i-1) + 0.25M_{c_cbbAa}(i-1)\Phi F_{C_cBbAA}(i-1) + 0.125M_{c_cbbAa}(i-1) \\ & (1-\Phi)F_{C_cBbAA}(i-1) + 0.25M_{c_cbbAa}(i-1)\Phi F_{C_cBbAA}(i-1) + 0.25M_{c_cbbAa}(i-1)F_{C_cBbAA}(i-1) + \\ & 0.25M_{c_cbbAA}(i-1)(1-\Phi)F_{c_cBbAa}(i-1) + 0.5M_{c_cbbAA}(i-1)\Phi F_{c_cBbAa}(i-1) + 0.5M_{c_cbbAA}(i-1)F_{c_cBbAA}(i-1) \\ & + 0.5M_{c_cbbAA}(i-1)(1-\Phi)F_{c_cBBAA}(i-1) + M_{c_cbbAA}(i-1)\Phi F_{c_cBBAA}(i-1) + M_{c_cbbAA}(i-1)F_{c_cBBAA}(i-1) + \\ & 0.125M_{c_cbbAA}(i-1)(1-\Phi)(1-\Phi)F_{C_cBbAa}(i-1) + 0.25M_{c_cbbAA}(i-1)\Phi(1-\Phi)F_{C_cBbAa}(i-1) + 0.25M_{c_cbbAA}(i-1) \\ & (1-\Phi)\Phi F_{C_cBbAa}(i-1) + 0.5M_{c_cbbAA}(i-1)\Phi F_{C_cBbAA}(i-1) + 0.25M_{c_cbbAA}(i-1)(1-\Phi)F_{C_cBbAA}(i-1) \\ & + 0.5M_{c_cbbAA}(i-1)\Phi F_{C_cBbAA}(i-1) + 0.25M_{c_cbbAA}(i-1)(1-\Phi)F_{C_cBBAA}(i-1) + 0.5M_{c_cbbAA}(i-1) \\ & \Phi F_{C_cBBAA}(i-1) + 0.5M_{c_cbbAA}(i-1)F_{C_cBBAA}(i-1) + 0.125(1-\Phi)M_{c_cBbAa}(i-1)F_{c_cbbAa}(i-1) + \\ & 0.25(1-\Phi)M_{c_cBbAa}(i-1)F_{c_cbbAA}(i-1) + 0.125(1-\Phi)M_{c_cBbAa}(i-1)(1-\Phi)F_{c_cBbAa}(i-1) + 0.25(1-\Phi) \\ & M_{c_cBbAa}(i-1)\Phi F_{c_cBbAa}(i-1) + 0.25(1-\Phi)M_{c_cBbAa}(i-1)F_{c_cBbAA}(i-1) + 0.125(1-\Phi)M_{c_cBbAa}(i-1) \\ & (1-\Phi)F_{c_cBBAA}(i-1) + 0.25(1-\Phi)M_{c_cBbAa}(i-1)\Phi F_{c_cBBAA}(i-1) + 0.25(1-\Phi)M_{c_cBbAa}(i-1)F_{c_cBBAA}(i-1) \\ & + 0.0625(1-\Phi)M_{c_cBbAa}(i-1)F_{C_cbbAa}(i-1) + 0.125(1-\Phi)M_{c_cBbAa}(i-1)F_{C_cbbAA}(i-1) + 0.0625(1-\Phi) \\ & M_{c_cBbAa}(i-1)(1-\Phi)(1-\Phi)F_{C_cBbAa}(i-1) + 0.0625(1-\Phi)M_{c_cBbAa}(i-1)\Phi(1-\Phi)F_{C_cBbAa}(i-1) \\ & + 0.125(1-\Phi)M_{c_cBbAa}(i-1)(1-\Phi)\Phi F_{C_cBbAa}(i-1) + 0.125(1-\Phi)M_{c_cBbAa}(i-1)\Phi F_{C_cBbAa}(i-1) \\ & + 0.125(1-\Phi)M_{c_cBbAa}(i-1)(1-\Phi)F_{C_cBbAA}(i-1) + 0.125(1-\Phi)M_{c_cBbAa}(i-1)\Phi F_{C_cBbAA}(i-1) \\ & + 0.0625(1-\Phi)M_{c_cBbAa}(i-1)(1-\Phi)F_{C_cBbAA}(i-1) + 0.125(1-\Phi)M_{c_cBbAa}(i-1)\Phi F_{C_cBbAA}(i-1) + 0.125(1-\Phi) \\ & M_{c_cBbAa}(i-1)F_{C_cBbAA}(i-1) + 0.25\Phi M_{c_cBbAa}(i-1)F_{c_cbbAa}(i-1) + 0.5\Phi M_{c_cBbAa}(i-1)F_{c_cbbAA}(i-1) \\ & + 0.25\Phi M_{c_cBbAa}(i-1)(1-\Phi)F_{c_cBBAA}(i-1) + 0.5\Phi M_{c_cBbAa}(i-1)\Phi F_{c_cBBAA}(i-1) + \\ & 0.5\Phi M_{c_cBbAa}(i-1)F_{c_cBBAA}(i-1) + 0.125\Phi M_{c_cBbAa}(i-1)F_{C_cbbAa}(i-1) + 0.25\Phi M_{c_cBbAa}(i-1)F_{C_cbbAA}(i-1) \\ & + 0.125\Phi M_{c_cBbAa}(i-1)(1-\Phi)(1-\Phi)F_{C_cBbAa}(i-1) + 0.125\Phi M_{c_cBbAa}(i-1)\Phi(1-\Phi)F_{C_cBbAa}(i-1) + \\ & 0.25\Phi M_{c_cBbAa}(i-1)(1-\Phi)\Phi F_{C_cBbAa}(i-1) + 0.25\Phi M_{c_cBbAa}(i-1)\Phi F_{C_cBbAa}(i-1) + 0.25\Phi M_{c_cBbAa}(i-1) \\ & (1-\Phi)F_{C_cBbAA}(i-1) + 0.25\Phi M_{c_cBbAa}(i-1)\Phi F_{C_cBbAA}(i-1) + 0.125\Phi M_{c_cBbAa}(i-1)(1-\Phi)F_{C_cBbAA}(i-1) \\ & + 0.25\Phi M_{c_cBbAa}(i-1)\Phi F_{C_cBbAA}(i-1) + 0.25\Phi M_{c_cBbAa}(i-1)F_{C_cBBAA}(i-1) + 0.25M_{c_cBbAA}(i-1) \\ & F_{c_cbbAa}(i-1) + 0.5M_{c_cBbAA}(i-1)F_{c_cbbAA}(i-1) + 0.25M_{c_cBbAA}(i-1)(1-\Phi)F_{c_cBbAa}(i-1) + 0.5M_{c_cBbAA}(i-1) \\ & \Phi F_{c_cBbAa}(i-1) + 0.5M_{c_cBbAA}(i-1)F_{c_cBbAA}(i-1) + 0.25M_{c_cBbAA}(i-1)(1-\Phi)F_{c_cBBAA}(i-1) + \\ & 0.5M_{c_cBbAA}(i-1)\Phi F_{c_cBBAA}(i-1) + 0.5M_{c_cBbAA}(i-1)F_{c_cBBAA}(i-1) + 0.125M_{c_cBbAA}(i-1)F_{C_cbbAa}(i-1) \\ & + 0.25M_{c_cBbAA}(i-1)F_{C_cbbAA}(i-1) + 0.125M_{c_cBbAA}(i-1)(1-\Phi)(1-\Phi)F_{C_cBbAa}(i-1) + 0.125M_{c_cBbAA}(i-1) \\ & \Phi(1-\Phi)F_{C_cBbAa}(i-1) + 0.25M_{c_cBbAA}(i-1)(1-\Phi)\Phi F_{C_cBbAa}(i-1) + 0.25M_{c_cBbAA}(i-1)\Phi F_{C_cBbAa}(i-1) \\ & + 0.25M_{c_cBbAA}(i-1)(1-\Phi)F_{C_cBbAA}(i-1) + 0.25M_{c_cBbAA}(i-1)\Phi F_{C_cBbAA}(i-1) + 0.125M_{c_cBbAA}(i-1) \\ & (1-\Phi)F_{C_cBBAA}(i-1) + 0.25M_{c_cBbAA}(i-1)\Phi F_{C_cBBAA}(i-1) + 0.25M_{c_cBbAA}(i-1)F_{C_cBBAA}(i-1) + \\ & 0.25(1-\Phi)M_{c_cBBAA}(i-1)F_{c_cbbAa}(i-1) + 0.5(1-\Phi)M_{c_cBBAA}(i-1)F_{c_cbbAA}(i-1) + 0.125(1-\Phi)M_{c_cBBAA}(i-1) \\ & (1-\Phi)F_{c_cBbAa}(i-1) + 0.25(1-\Phi)M_{c_cBBAA}(i-1)\Phi F_{c_cBbAa}(i-1) + 0.25(1-\Phi)M_{c_cBBAA}(i-1)F_{c_cBbAA}(i-1) \\ & + 0.125(1-\Phi)M_{c_cBBAA}(i-1)F_{C_cbbAa}(i-1) + 0.25(1-\Phi)M_{c_cBBAA}(i-1)F_{C_cbbAA}(i-1) + 0.0625(1-\Phi) \\ & \Phi M_{c_cBBAA}(i-1)(1-\Phi)(1-\Phi)F_{C_cBbAa}(i-1) + 0.125(1-\Phi)M_{c_cBBAA}(i-1)(1-\Phi)\Phi F_{C_cBbAa}(i-1) + \\ & 0.125(1-\Phi)M_{c_cBBAA}(i-1)(1-\Phi)F_{C_cBbAA}(i-1) + 0.5\Phi M_{c_cBBAA}(i-1)F_{c_cbbAa}(i-1) + \Phi M_{c_cBBAA}(i-1) \\ & F_{c_cbbAA}(i-1) + 0.25\Phi M_{c_cBBAA}(i-1)(1-\Phi)F_{c_cBbAa}(i-1) + 0.5\Phi M_{c_cBBAA}(i-1)\Phi F_{c_cBbAa}(i-1) + \\ & 0.5\Phi M_{c_cBBAA}(i-1)F_{c_cBbAA}(i-1) + 0.25\Phi M_{c_cBBAA}(i-1)F_{C_cbbAa}(i-1) + 0.5\Phi M_{c_cBBAA}(i-1)F_{C_cbbAA}(i-1) \\ & + 0.125\Phi M_{c_cBBAA}(i-1)(1-\Phi)(1-\Phi)F_{C_cBbAa}(i-1) + 0.25\Phi M_{c_cBBAA}(i-1)(1-\Phi)\Phi F_{C_cBbAa}(i-1) \\ & + 0.25\Phi M_{c_cBBAA}(i-1)(1-\Phi)F_{C_cBbAA}(i-1) + 0.5M_{c_cBBAA}(i-1)F_{c_cbbAa}(i-1) + M_{c_cBBAA}(i-1) \\ & F_{c_cbbAA}(i-1) + 0.25M_{c_cBBAA}(i-1)(1-\Phi)F_{c_cBbAa}(i-1) + 0.5M_{c_cBBAA}(i-1)\Phi F_{c_cBbAa}(i-1) + \\ & 0.5M_{c_cBBAA}(i-1)F_{c_cBbAA}(i-1) + 0.25M_{c_cBBAA}(i-1)F_{C_cbbAa}(i-1) + 0.5M_{c_cBBAA}(i-1)F_{C_cbbAA}(i-1) \\ & + 0.125M_{c_cBBAA}(i-1)(1-\Phi)(1-\Phi)F_{C_cBbAa}(i-1) + 0.25M_{c_cBBAA}(i-1)(1-\Phi)\Phi F_{C_cBbAa}(i-1) + \\ & 0.25M_{c_cBBAA}(i-1)(1-\Phi)F_{C_cBbAA}(i-1) + 0.0625M_{C_cbbAa}(i-1)(1-\Phi)F_{c_cBbAa}(i-1) + 0.125M_{C_cbbAa}(i-1) \\ & \Phi F_{c_cBbAa}(i-1) + 0.125M_{C_cbbAa}(i-1)F_{c_cBbAA}(i-1) + 0.125M_{C_cbbAa}(i-1)(1-\Phi)F_{c_cBbAA}(i-1) + \\ & 0.25M_{C_cbbAa}(i-1)\Phi F_{c_cBbAA}(i-1) + 0.25M_{C_cbbAa}(i-1)F_{c_cBBAA}(i-1) + 0.03125M_{C_cbbAa}(i-1)(1-\Phi)(1-\Phi) \\ & \Phi F_{C_cBbAa}(i-1) + 0.0625M_{C_cbbAa}(i-1)\Phi(1-\Phi)F_{C_cBbAa}(i-1) + 0.0625M_{C_cbbAa}(i-1)(1-\Phi)\Phi F_{C_cBbAa}(i-1) \end{aligned}$$





$$1)F_{CcbbAA}(i-1) + 0.0625\Phi M_{CcBBAA}(i-1)(1-\Phi)(1-\Phi)F_{CcBbAA}(i-1) + 0.125\Phi M_{CcBBAA}(i-1)(1-\Phi)\Phi F_{CcBbAA}(i-1) + 0.125\Phi M_{CcBBAA}(i-1)(1-\Phi)F_{CcBbAA}(i-1) + 0.25M_{CcBBAA}(i-1)F_{CcBbAA}(i-1) + 0.5M_{CcBBAA}(i-1)F_{CcBbAA}(i-1) + 0.125M_{CcBBAA}(i-1)(1-\Phi)F_{CcBbAA}(i-1) + 0.25M_{CcBBAA}(i-1)\Phi F_{CcBbAA}(i-1) + 0.25M_{CcBBAA}(i-1)F_{CcBbAA}(i-1) + 0.0625M_{CcBBAA}(i-1)(1-\Phi)(1-\Phi)F_{CcBbAA}(i-1) + 0.125M_{CcBBAA}(i-1)(1-\Phi)\Phi F_{CcBbAA}(i-1) + 0.125M_{CcBBAA}(i-1)(1-\Phi)F_{CcBbAA}(i-1)],$$

$$M_{ccBBaa}^e = \left(\frac{\bar{\Omega}_{ccBBaa}}{2}\right) [0.25M_{ccBbaa}(i-1)F_{CcBbaa}(i-1) + 0.125M_{ccBbaa}(i-1)(1-\Phi)F_{CcBbAA}(i-1) + 0.5M_{ccBbaa}(i-1)F_{CcBBaa}(i-1) + 0.25M_{ccBbaa}(i-1)(1-\Phi)F_{CcBBaa}(i-1) + 0.125M_{ccBbaa}(i-1)(1-\Phi)F_{CcBbaa}(i-1) + 0.25M_{ccBbaa}(i-1)\Phi F_{CcBbaa}(i-1) + 0.0625M_{ccBbaa}(i-1)(1-\Phi)(1-\Phi)F_{CcBbAA}(i-1) + 0.125M_{ccBbaa}(i-1)\Phi(1-\Phi)F_{CcBbAA}(i-1) + 0.25M_{ccBbaa}(i-1)F_{CcBbAA}(i-1) + 0.125M_{ccBbaa}(i-1)(1-\Phi)F_{CcBBaa}(i-1) + 0.125M_{ccBbaa}(i-1)(1-\Phi)F_{CcBBaa}(i-1) + 0.125(1-\Phi)M_{ccBbAA}(i-1)F_{CcBbaa}(i-1) + 0.0625(1-\Phi)M_{ccBbAA}(i-1)(1-\Phi)F_{CcBbAA}(i-1) + 0.25(1-\Phi)M_{ccBbAA}(i-1)F_{CcBBaa}(i-1) + 0.125(1-\Phi)M_{ccBbAA}(i-1)(1-\Phi)F_{CcBBaa}(i-1) + 0.0625(1-\Phi)M_{ccBbAA}(i-1)(1-\Phi)F_{CcBbaa}(i-1) + 0.03125(1-\Phi)M_{ccBbAA}(i-1)(1-\Phi)(1-\Phi)F_{CcBbAA}(i-1) + 0.0625(1-\Phi)M_{ccBbAA}(i-1)\Phi(1-\Phi)F_{CcBbAA}(i-1) + 0.125(1-\Phi)M_{ccBbAA}(i-1)F_{CcBBaa}(i-1) + 0.0625(1-\Phi)M_{ccBbAA}(i-1)(1-\Phi)F_{CcBBaa}(i-1) + 0.5M_{ccBBaa}(i-1)F_{CcBbaa}(i-1) + 0.25M_{ccBBaa}(i-1)(1-\Phi)F_{CcBbAA}(i-1) + M_{ccBBaa}(i-1)F_{CcBBaa}(i-1) + 0.5M_{ccBBaa}(i-1)(1-\Phi)F_{CcBBaa}(i-1) + 0.25M_{ccBBaa}(i-1)(1-\Phi)F_{CcBbaa}(i-1) + 0.5M_{ccBBaa}(i-1)\Phi F_{CcBbaa}(i-1) + 0.125M_{ccBBaa}(i-1)(1-\Phi)(1-\Phi)F_{CcBbAA}(i-1) + 0.25M_{ccBBaa}(i-1)\Phi(1-\Phi)F_{CcBbAA}(i-1) + 0.5M_{ccBBaa}(i-1)F_{CcBBaa}(i-1) + 0.25M_{ccBBaa}(i-1)(1-\Phi)F_{CcBBaa}(i-1) + 0.25(1-\Phi)M_{ccBBaa}(i-1)F_{CcBbaa}(i-1) + 0.125(1-\Phi)M_{ccBBaa}(i-1)(1-\Phi)F_{CcBbAA}(i-1) + 0.5(1-\Phi)M_{ccBBaa}(i-1)F_{CcBBaa}(i-1) + 0.25(1-\Phi)M_{ccBBaa}(i-1)(1-\Phi)F_{CcBBaa}(i-1) + 0.125(1-\Phi)M_{ccBBaa}(i-1)(1-\Phi)F_{CcBbaa}(i-1) + 0.25(1-\Phi)M_{ccBBaa}(i-1)\Phi F_{CcBbaa}(i-1) + 0.0625(1-\Phi)M_{ccBBaa}(i-1)(1-\Phi)(1-\Phi)F_{CcBbAA}(i-1) + 0.125(1-\Phi)M_{ccBBaa}(i-1)\Phi(1-\Phi)F_{CcBbAA}(i-1) + 0.25(1-\Phi)M_{ccBBaa}(i-1)F_{CcBBaa}(i-1) + 0.125(1-\Phi)M_{ccBBaa}(i-1)(1-\Phi)F_{CcBBaa}(i-1) + 0.125(1-\Phi)M_{CcBbaa}(i-1)F_{CcBbaa}(i-1) + 0.0625(1-\Phi)M_{CcBbaa}(i-1)(1-\Phi)F_{CcBbaa}(i-1) + 0.125(1-\Phi)M_{CcBbaa}(i-1)(1-\Phi)F_{CcBBaa}(i-1) + 0.0625(1-\Phi)M_{CcBbaa}(i-1)(1-\Phi)F_{CcBbAA}(i-1) + 0.03125(1-\Phi)M_{CcBbaa}(i-1)(1-\Phi)(1-\Phi)F_{CcBbAA}(i-1) + 0.0625(1-\Phi)M_{CcBbaa}(i-1)\Phi(1-\Phi)F_{CcBbAA}(i-1) + 0.125\Phi M_{CcBbaa}(i-1)(1-\Phi)F_{CcBbAA}(i-1) + 0.125\Phi M_{CcBbaa}(i-1)(1-\Phi)F_{CcBBaa}(i-1) + 0.125\Phi M_{CcBbaa}(i-1)\Phi F_{CcBbaa}(i-1) + 0.0625\Phi M_{CcBbaa}(i-1)(1-\Phi)(1-\Phi)F_{CcBbAA}(i-1) + 0.125\Phi M_{CcBbaa}(i-1)\Phi(1-\Phi)F_{CcBbAA}(i-1) + 0.25\Phi M_{CcBbaa}(i-1)F_{CcBBaa}(i-1) + 0.125\Phi M_{CcBbaa}(i-1)(1-\Phi)F_{CcBBaa}(i-1) + 0.0625(1-\Phi)(1-\Phi)M_{CcBbAA}(i-1)F_{CcBbaa}(i-1) + 0.03125(1-\Phi)(1-\Phi)M_{CcBbAA}(i-1)F_{CcBBaa}(i-1) + 0.0625(1-\Phi)(1-\Phi)M_{CcBbAA}(i-1)\Phi F_{CcBbaa}(i-1) + 0.015625(1-\Phi)(1-\Phi)M_{CcBbAA}(i-1)(1-\Phi)(1-\Phi)F_{CcBbAA}(i-1) + 0.03125(1-\Phi)(1-\Phi)M_{CcBbAA}(i-1)\Phi(1-\Phi)F_{CcBbAA}(i-1) + 0.0625(1-\Phi)(1-\Phi)M_{CcBbAA}(i-1)F_{CcBBaa}(i-1) + 0.125\Phi(1-\Phi)M_{CcBbAA}(i-1)F_{CcBbaa}(i-1) + 0.0625\Phi(1-\Phi)M_{CcBbAA}(i-1)(1-\Phi)F_{CcBBaa}(i-1) + 0.25\Phi(1-\Phi)M_{CcBbAA}(i-1)F_{CcBBaa}(i-1) + 0.125\Phi(1-\Phi)M_{CcBbAA}(i-1)(1-\Phi)F_{CcBBaa}(i-1) + 0.0625\Phi(1-\Phi)M_{CcBbAA}(i-1)\Phi F_{CcBbaa}(i-1) + 0.03125\Phi(1-\Phi)M_{CcBbAA}(i-1)(1-\Phi)F_{CcBbAA}(i-1) + 0.125\Phi(1-\Phi)M_{CcBbAA}(i-1)F_{CcBBaa}(i-1) + 0.0625\Phi(1-\Phi)M_{CcBbAA}(i-1)(1-\Phi)F_{CcBBaa}(i-1) + 0.25\Phi(1-\Phi)M_{CcBbAA}(i-1)F_{CcBbaa}(i-1) + 0.125\Phi(1-\Phi)M_{CcBbAA}(i-1)(1-\Phi)F_{CcBBaa}(i-1) + 0.0625\Phi(1-\Phi)M_{CcBbAA}(i-1)(1-\Phi)F_{CcBBaa}(i-1) + 0.25\Phi(1-\Phi)M_{CcBbAA}(i-1)F_{CcBBaa}(i-1) + 0.125\Phi(1-\Phi)M_{CcBbAA}(i-1)(1-\Phi)F_{CcBBaa}(i-1) + 0.0625(1-\Phi)M_{CcBbAA}(i-1)\Phi F_{CcBbaa}(i-1) + 0.03125(1-\Phi)M_{CcBbAA}(i-1)(1-\Phi)F_{CcBbAA}(i-1) + 0.125(1-\Phi)M_{CcBbAA}(i-1)(1-\Phi)F_{CcBbAA}(i-1) + 0.0625(1-\Phi)M_{CcBbAA}(i-1)\Phi(1-\Phi)F_{CcBbAA}(i-1) + 0.125(1-\Phi)M_{CcBbAA}(i-1)F_{CcBBaa}(i-1) + 0.0625(1-\Phi)M_{CcBbAA}(i-1)(1-\Phi)F_{CcBBaa}(i-1)],$$

$$M_{ccBBAA}^e = \left(\frac{\bar{\Omega}_{ccBBAA}}{2}\right) [0.125M_{ccBbaa}(i-1)(1-\Phi)F_{CcBbAA}(i-1) + 0.25M_{ccBbaa}(i-1)\Phi F_{CcBbAA}(i-1) + 0.25M_{ccBbaa}(i-1)F_{CcBbAA}(i-1) + 0.25M_{ccBbaa}(i-1)(1-\Phi)F_{CcBBAA}(i-1) + 0.5M_{ccBbaa}(i-1)\Phi F_{CcBBAA}(i-1) + 0.5M_{ccBbaa}(i-1)F_{CcBBAA}(i-1) + 0.0625M_{ccBbaa}(i-1)(1-\Phi)(1-\Phi)F_{CcBbAA}(i-1) + 0.125M_{ccBbaa}(i-1)(1-\Phi)\Phi F_{CcBbAA}(i-1) + 0.125M_{ccBbaa}(i-1)(1-\Phi)F_{CcBbAA}(i-1)],$$

$$\begin{aligned}
& 1)\Phi(1-\Phi)F_{CcBbAa}(i-1)+0.125M_{ccBbaa}(i-1)(1-\Phi)\Phi F_{CcBbAa}(i-1)+0.25M_{ccBbaa}(i-1)\Phi\Phi F_{CcBbAa}(i-1) \\
& +0.125M_{ccBbaa}(i-1)(1-\Phi)F_{CcBbAA}(i-1)+0.25M_{ccBbaa}(i-1)\Phi F_{CcBbAA}(i-1)+0.125M_{ccBbaa}(i-1) \\
& (1-\Phi)F_{CcBbAA}(i-1)+0.25M_{ccBbaa}(i-1)\Phi F_{CcBbAA}(i-1)+0.25M_{ccBbaa}(i-1)F_{CcBbAA}(i-1)+ \\
& 0.125(1-\Phi)M_{ccBbAa}(i-1)F_{ccBbaa}(i-1)+0.125(1-\Phi)M_{ccBbAa}(i-1)(1-\Phi)F_{ccBbAa}(i-1)+0.125(1-\Phi) \\
& M_{ccBbAa}(i-1)\Phi F_{ccBbAa}(i-1)+0.125(1-\Phi)M_{ccBbAa}(i-1)F_{ccBbAA}(i-1)+0.25(1-\Phi)M_{ccBbAa}(i-1) \\
& F_{ccBbAA}(i-1)+0.25(1-\Phi)M_{ccBbAa}(i-1)(1-\Phi)F_{ccBbAA}(i-1)+0.25(1-\Phi)M_{ccBbAa}(i-1)\Phi F_{ccBbAA}(i-1) \\
& +0.25(1-\Phi)M_{ccBbAa}(i-1)F_{ccBbAA}(i-1)+0.0625(1-\Phi)M_{ccBbAa}(i-1)(1-\Phi)F_{CcBbaa}(i-1)+0.125(1-\Phi) \\
& M_{ccBbAa}(i-1)\Phi F_{CcBbaa}(i-1)+0.0625(1-\Phi)M_{ccBbAa}(i-1)(1-\Phi)(1-\Phi)F_{CcBbAa}(i-1)+0.125(1-\Phi) \\
& M_{ccBbAa}(i-1)\Phi\Phi F_{CcBbAa}(i-1)+0.0625(1-\Phi)M_{ccBbAa}(i-1)(1-\Phi)F_{CcBbAA}(i-1)+0.125(1-\Phi) \\
& M_{ccBbAa}(i-1)\Phi F_{CcBbAA}(i-1)+0.125(1-\Phi)M_{ccBbAa}(i-1)F_{CcBbAA}(i-1)+0.125(1-\Phi)M_{ccBbAa}(i-1) \\
& (1-\Phi)F_{CcBbAA}(i-1)+0.125(1-\Phi)M_{ccBbAa}(i-1)\Phi F_{CcBbAA}(i-1)+0.125(1-\Phi)M_{ccBbAa}(i-1) \\
& F_{CcBbAA}(i-1)+0.25\Phi M_{ccBbAa}(i-1)F_{ccBbaa}(i-1)+0.125\Phi M_{ccBbAa}(i-1)(1-\Phi)F_{ccBbAa}(i-1)+ \\
& 0.5\Phi M_{ccBbAa}(i-1)F_{ccBbAA}(i-1)+0.25\Phi M_{ccBbAa}(i-1)(1-\Phi)F_{ccBbAA}(i-1)+0.125\Phi M_{ccBbAa}(i-1)(1-\Phi) \\
& F_{CcBbaa}(i-1)+0.25\Phi M_{ccBbAa}(i-1)\Phi F_{CcBbaa}(i-1)+0.0625\Phi M_{ccBbAa}(i-1)(1-\Phi)(1-\Phi)F_{CcBbAa}(i-1) \\
& +0.125\Phi M_{ccBbAa}(i-1)\Phi(1-\Phi)F_{CcBbAa}(i-1)+0.25\Phi M_{ccBbAa}(i-1)F_{CcBbAA}(i-1)+0.125\Phi M_{ccBbAa}(i-1) \\
& (1-\Phi)F_{CcBbAA}(i-1)+0.25M_{ccBbAA}(i-1)F_{ccBbaa}(i-1)+0.125M_{ccBbAA}(i-1)(1-\Phi)F_{ccBbAa}(i-1)+ \\
& 0.5M_{ccBbAA}(i-1)F_{ccBbAA}(i-1)+0.25M_{ccBbAA}(i-1)(1-\Phi)F_{ccBbAA}(i-1)+0.125M_{ccBbAA}(i-1)(1-\Phi) \\
& F_{CcBbaa}(i-1)+0.25M_{ccBbAA}(i-1)\Phi F_{CcBbaa}(i-1)+0.0625M_{ccBbAA}(i-1)(1-\Phi)(1-\Phi)F_{CcBbAa}(i-1) \\
& +0.125M_{ccBbAA}(i-1)\Phi(1-\Phi)F_{CcBbAa}(i-1)+0.25M_{ccBbAA}(i-1)F_{CcBbAA}(i-1)+0.125M_{ccBbAA}(i-1) \\
& (1-\Phi)F_{CcBbAA}(i-1)+0.25M_{ccBbAA}(i-1)(1-\Phi)F_{ccBbAa}(i-1)+0.5M_{ccBbAA}(i-1)\Phi F_{ccBbAa}(i-1)+ \\
& 0.5M_{ccBbAA}(i-1)F_{ccBbAA}(i-1)+0.5M_{ccBbAA}(i-1)(1-\Phi)F_{ccBbAA}(i-1)+M_{ccBbAA}(i-1)\Phi F_{ccBbAA}(i-1) \\
& +M_{ccBbAA}(i-1)F_{ccBbAA}(i-1)+0.125M_{ccBbAA}(i-1)(1-\Phi)(1-\Phi)F_{CcBbAa}(i-1)+0.25M_{ccBbAA}(i-1) \\
& \Phi(1-\Phi)F_{CcBbAa}(i-1)+0.25M_{ccBbAA}(i-1)(1-\Phi)\Phi F_{CcBbAa}(i-1)+0.5M_{ccBbAA}(i-1)\Phi\Phi F_{CcBbAa}(i-1) \\
& +0.25M_{ccBbAA}(i-1)(1-\Phi)F_{CcBbAA}(i-1)+0.5M_{ccBbAA}(i-1)\Phi F_{CcBbAA}(i-1)+0.25M_{ccBbAA}(i-1) \\
& (1-\Phi)F_{CcBbAA}(i-1)+0.5M_{ccBbAA}(i-1)\Phi F_{CcBbAA}(i-1)+0.5M_{ccBbAA}(i-1)F_{CcBbAA}(i-1)+0.25(1-\Phi) \\
& M_{ccBbAA}(i-1)F_{ccBbaa}(i-1)+0.25(1-\Phi)M_{ccBbAA}(i-1)(1-\Phi)F_{ccBbAa}(i-1)+0.25(1-\Phi)M_{ccBbAA}(i-1) \\
& \Phi F_{ccBbAa}(i-1)+0.25(1-\Phi)M_{ccBbAA}(i-1)F_{ccBbAA}(i-1)+0.5(1-\Phi)M_{ccBbAA}(i-1)\Phi F_{ccBbAA}(i-1) \\
& F_{ccBbAA}(i-1)+0.5(1-\Phi)M_{ccBbAA}(i-1)F_{ccBbAA}(i-1)+0.125(1-\Phi)M_{ccBbAA}(i-1)(1-\Phi)F_{CcBbaa}(i-1)+0.25(1-\Phi) \\
& M_{ccBbAA}(i-1)\Phi F_{CcBbaa}(i-1)+0.125(1-\Phi)M_{ccBbAA}(i-1)(1-\Phi)(1-\Phi)F_{CcBbAa}(i-1)+0.25(1-\Phi) \\
& M_{ccBbAA}(i-1)\Phi(1-\Phi)F_{CcBbAa}(i-1)+0.125(1-\Phi)M_{ccBbAA}(i-1)(1-\Phi)\Phi F_{CcBbAa}(i-1)+0.25(1-\Phi) \\
& M_{ccBbAA}(i-1)\Phi\Phi F_{CcBbAa}(i-1)+0.125(1-\Phi)M_{ccBbAA}(i-1)(1-\Phi)F_{CcBbAA}(i-1)+0.25(1-\Phi) \\
& M_{ccBbAA}(i-1)\Phi F_{CcBbAA}(i-1)+0.25(1-\Phi)M_{ccBbAA}(i-1)F_{CcBbAA}(i-1)+0.25(1-\Phi)M_{ccBbAA}(i-1) \\
& (1-\Phi)F_{CcBbAA}(i-1)+0.5\Phi M_{ccBbAA}(i-1)F_{ccBbaa}(i-1)+0.25\Phi M_{ccBbAA}(i-1)(1-\Phi)F_{ccBbAa}(i-1)+ \\
& \Phi M_{ccBbAA}(i-1)F_{ccBbAA}(i-1)+0.5\Phi M_{ccBbAA}(i-1)(1-\Phi)F_{ccBbAA}(i-1)+0.25\Phi M_{ccBbAA}(i-1)(1-\Phi) \\
& F_{CcBbaa}(i-1)+0.5\Phi M_{ccBbAA}(i-1)\Phi F_{CcBbaa}(i-1)+0.125\Phi M_{ccBbAA}(i-1)(1-\Phi)(1-\Phi)F_{CcBbAa}(i-1) \\
& +0.25\Phi M_{ccBbAA}(i-1)\Phi(1-\Phi)F_{CcBbAa}(i-1)+0.5\Phi M_{ccBbAA}(i-1)F_{CcBbAA}(i-1)+0.25\Phi M_{ccBbAA}(i-1) \\
& (1-\Phi)F_{CcBbAA}(i-1)+0.5M_{ccBbAA}(i-1)F_{ccBbaa}(i-1)+0.25M_{ccBbAA}(i-1)(1-\Phi)F_{ccBbAa}(i-1)+ \\
& 0.25M_{ccBbAA}(i-1)F_{CcBbAA}(i-1)+0.5M_{ccBbAA}(i-1)\Phi F_{CcBbaa}(i-1)+0.25M_{ccBbAA}(i-1)(1-\Phi)F_{CcBbAA}(i-1) \\
& (1-\Phi)F_{CcBbAA}(i-1)+0.5M_{ccBbAA}(i-1)F_{CcBbAA}(i-1)+0.125M_{ccBbAA}(i-1)(1-\Phi)(1-\Phi)F_{CcBbAa}(i-1) \\
& +0.25M_{ccBbAA}(i-1)\Phi F_{CcBbaa}(i-1)+0.125\Phi M_{ccBbAA}(i-1)(1-\Phi)F_{ccBbAa}(i-1)+0.25\Phi M_{ccBbAA}(i-1) \\
& \Phi F_{ccBbAa}(i-1)+0.25\Phi M_{ccBbAA}(i-1)F_{ccBbAA}(i-1)+0.5\Phi M_{ccBbAA}(i-1)F_{ccBbAA}(i-1)+0.0625\Phi M_{ccBbAA}(i-1)(1-\Phi) \\
& (1-\Phi)F_{CcBbAa}(i-1)+0.0625(1-\Phi)M_{CcBbaa}(i-1)\Phi(1-\Phi)F_{CcBbAa}(i-1)+0.125(1-\Phi)M_{CcBbaa}(i-1) \\
& (1-\Phi)F_{CcBbAA}(i-1)+0.0625(1-\Phi)M_{CcBbaa}(i-1)(1-\Phi)F_{CcBbAA}(i-1)+0.125(1-\Phi)M_{CcBbaa}(i-1)\Phi F_{CcBbAA}(i-1) \\
& +0.0625(1-\Phi)M_{CcBbaa}(i-1)(1-\Phi)F_{CcBbAA}(i-1)+0.125(1-\Phi)M_{CcBbaa}(i-1)\Phi F_{CcBbAA}(i-1) \\
& +0.0625(1-\Phi)M_{CcBbaa}(i-1)(1-\Phi)F_{CcBbAA}(i-1)+0.125(1-\Phi)M_{CcBbaa}(i-1)\Phi F_{CcBbAA}(i-1) \\
& +0.125(1-\Phi)M_{CcBbaa}(i-1)F_{CcBbAA}(i-1)+0.125\Phi M_{CcBbaa}(i-1)(1-\Phi)F_{ccBbAa}(i-1)+0.25\Phi M_{CcBbaa}(i-1) \\
& \Phi F_{ccBbAa}(i-1)+0.25\Phi M_{CcBbaa}(i-1)F_{ccBbAA}(i-1)+0.25\Phi M_{CcBbaa}(i-1)(1-\Phi)F_{ccBbAA}(i-1)+ \\
& 0.5\Phi M_{CcBbaa}(i-1)\Phi F_{ccBbAA}(i-1)+0.5\Phi M_{CcBbaa}(i-1)F_{ccBbAA}(i-1)+0.0625\Phi M_{CcBbaa}(i-1)(1-\Phi) \\
& (1-\Phi)F_{CcBbAa}(i-1)+0.125\Phi M_{CcBbaa}(i-1)\Phi(1-\Phi)F_{CcBbAa}(i-1)+0.125\Phi M_{CcBbaa}(i-1)(1-\Phi) \\
& \Phi F_{CcBbAa}(i-1)+0.25\Phi M_{CcBbaa}(i-1)\Phi\Phi F_{CcBbAa}(i-1)+0.125\Phi M_{CcBbaa}(i-1)(1-\Phi)F_{CcBbAA}(i-1)+ \\
& 0.25\Phi M_{CcBbaa}(i-1)\Phi F_{CcBbAA}(i-1)+0.125\Phi M_{CcBbaa}(i-1)(1-\Phi)F_{CcBbAA}(i-1)+0.25\Phi M_{CcBbaa}(i-1) \\
& \Phi F_{CcBbAA}(i-1)+0.25\Phi M_{CcBbaa}(i-1)F_{CcBbAA}(i-1)+0.0625(1-\Phi)(1-\Phi)M_{CcBbAa}(i-1)F_{ccBbaa}(i-1)
\end{aligned}$$



$$0.125\Phi M_{CcBBAA}(i-1)\Phi(1-\Phi)F_{CcBbAa}(i-1)+0.25\Phi M_{CcBBAA}(i-1)F_{CcBBaa}(i-1)+0.125\Phi M_{CcBBAA}(i-1)(1-\Phi)F_{CcBBAA}(i-1)+0.25M_{CcBBAA}(i-1)F_{CcBbaa}(i-1)+0.125M_{CcBBAA}(i-1)(1-\Phi)F_{CcBbAa}(i-1)+0.5M_{CcBBAA}(i-1)F_{CcBBaa}(i-1)+0.25M_{CcBBAA}(i-1)(1-\Phi)F_{CcBBAA}(i-1)+0.125M_{CcBBAA}(i-1)(1-\Phi)F_{CcBbaa}(i-1)+0.25M_{CcBBAA}(i-1)\Phi F_{CcBbaa}(i-1)+0.0625M_{CcBBAA}(i-1)(1-\Phi)(1-\Phi)F_{CcBbAa}(i-1)+0.125M_{CcBBAA}(i-1)\Phi(1-\Phi)F_{CcBbAa}(i-1)+0.25M_{CcBBAA}(i-1)F_{CcBBaa}(i-1)+0.125M_{CcBBAA}(i-1)(1-\Phi)F_{CcBBAA}(i-1)],$$

$$M_{ccBBAA}^e = \left( \frac{\bar{\Omega}_{ccBBAA}}{2} \right) [0.0625(1-\Phi)M_{ccBbAa}(i-1)(1-\Phi)F_{ccBbAa}(i-1)+0.125(1-\Phi)M_{ccBbAa}(i-1)\Phi F_{ccBbAa}(i-1)+0.125(1-\Phi)M_{ccBbAa}(i-1)F_{ccBBAA}(i-1)+0.125(1-\Phi)M_{ccBbAa}(i-1)(1-\Phi)F_{ccBBAA}(i-1)+0.25(1-\Phi)M_{ccBbAa}(i-1)\Phi F_{ccBBAA}(i-1)+0.25(1-\Phi)M_{ccBbAa}(i-1)F_{ccBBAA}(i-1)+0.03125(1-\Phi)M_{ccBbAa}(i-1)(1-\Phi)(1-\Phi)F_{CcBbAa}(i-1)+0.0625(1-\Phi)M_{ccBbAa}(i-1)\Phi(1-\Phi)F_{CcBbAa}(i-1)+0.0625(1-\Phi)M_{ccBbAa}(i-1)(1-\Phi)\Phi F_{CcBbAa}(i-1)+0.125(1-\Phi)M_{ccBbAa}(i-1)\Phi\Phi F_{CcBbAa}(i-1)+0.0625(1-\Phi)M_{ccBbAa}(i-1)(1-\Phi)F_{CcBbAA}(i-1)+0.125(1-\Phi)M_{ccBbAa}(i-1)\Phi F_{CcBbAA}(i-1)+0.0625(1-\Phi)M_{ccBbAa}(i-1)(1-\Phi)F_{CcBBAA}(i-1)+0.125(1-\Phi)M_{ccBbAa}(i-1)\Phi F_{CcBBAA}(i-1)+0.25(1-\Phi)M_{ccBbAa}(i-1)\Phi F_{CcBBAA}(i-1)+0.125(1-\Phi)M_{ccBbAa}(i-1)F_{CcBBAA}(i-1)+0.125\Phi M_{ccBbAa}(i-1)(1-\Phi)F_{ccBbAa}(i-1)+0.25\Phi M_{ccBbAa}(i-1)(1-\Phi)F_{ccBBAA}(i-1)+0.5\Phi M_{ccBbAa}(i-1)\Phi F_{CcBBAA}(i-1)+0.5\Phi M_{ccBbAa}(i-1)F_{CcBBAA}(i-1)+0.0625\Phi M_{ccBbAa}(i-1)(1-\Phi)(1-\Phi)F_{CcBbAa}(i-1)+0.125\Phi M_{ccBbAa}(i-1)\Phi(1-\Phi)F_{CcBbAa}(i-1)+0.125\Phi M_{ccBbAa}(i-1)(1-\Phi)\Phi F_{CcBbAa}(i-1)+0.25\Phi M_{ccBbAa}(i-1)\Phi\Phi F_{CcBbAa}(i-1)+0.125\Phi M_{ccBbAa}(i-1)(1-\Phi)F_{CcBbAA}(i-1)+0.25\Phi M_{ccBbAa}(i-1)\Phi F_{CcBbAA}(i-1)+0.25\Phi M_{ccBbAa}(i-1)F_{CcBBAA}(i-1)+0.25M_{ccBbAA}(i-1)(1-\Phi)F_{ccBbAa}(i-1)+0.25M_{ccBbAA}(i-1)\Phi F_{ccBbAa}(i-1)+0.5M_{ccBbAA}(i-1)\Phi F_{CcBBAA}(i-1)+0.5M_{ccBbAA}(i-1)F_{CcBBAA}(i-1)+0.0625M_{ccBbAA}(i-1)(1-\Phi)(1-\Phi)F_{CcBbAa}(i-1)+0.125M_{ccBbAA}(i-1)\Phi(1-\Phi)F_{CcBbAa}(i-1)+0.125M_{ccBbAA}(i-1)(1-\Phi)\Phi F_{CcBbAa}(i-1)+0.25M_{ccBbAA}(i-1)\Phi\Phi F_{CcBbAa}(i-1)+0.125M_{ccBbAA}(i-1)(1-\Phi)F_{CcBbAA}(i-1)+0.25M_{ccBbAA}(i-1)\Phi F_{CcBbAA}(i-1)+0.25M_{ccBbAA}(i-1)F_{CcBBAA}(i-1)+0.25M_{ccBbAA}(i-1)(1-\Phi)F_{ccBbAa}(i-1)+0.25M_{ccBbAA}(i-1)\Phi F_{ccBbAa}(i-1)+0.5M_{ccBbAA}(i-1)\Phi F_{CcBBAA}(i-1)+0.5M_{ccBbAA}(i-1)F_{CcBBAA}(i-1)+0.0625M_{ccBbAA}(i-1)(1-\Phi)(1-\Phi)F_{CcBbAa}(i-1)+0.125M_{ccBbAA}(i-1)\Phi(1-\Phi)F_{CcBbAa}(i-1)+0.125M_{ccBbAA}(i-1)(1-\Phi)\Phi F_{CcBbAa}(i-1)+0.25M_{ccBbAA}(i-1)\Phi\Phi F_{CcBbAa}(i-1)+0.125M_{ccBbAA}(i-1)(1-\Phi)F_{CcBbAA}(i-1)+0.25M_{ccBbAA}(i-1)\Phi F_{CcBbAA}(i-1)+0.25M_{ccBbAA}(i-1)F_{CcBBAA}(i-1)+0.125(1-\Phi)M_{ccBbAA}(i-1)(1-\Phi)F_{ccBbAa}(i-1)+0.25(1-\Phi)M_{ccBbAA}(i-1)\Phi F_{ccBbAa}(i-1)+0.25(1-\Phi)M_{ccBbAA}(i-1)(1-\Phi)F_{CcBBAA}(i-1)+0.25(1-\Phi)M_{ccBbAA}(i-1)F_{CcBBAA}(i-1)+0.5(1-\Phi)M_{ccBbAA}(i-1)\Phi F_{CcBBAA}(i-1)+0.5(1-\Phi)M_{ccBbAA}(i-1)F_{CcBBAA}(i-1)+0.0625(1-\Phi)M_{ccBbAA}(i-1)(1-\Phi)(1-\Phi)F_{CcBbAa}(i-1)+0.125(1-\Phi)M_{ccBbAA}(i-1)\Phi(1-\Phi)F_{CcBbAa}(i-1)+0.125(1-\Phi)M_{ccBbAA}(i-1)(1-\Phi)\Phi F_{CcBbAa}(i-1)+0.25(1-\Phi)M_{ccBbAA}(i-1)\Phi\Phi F_{CcBbAa}(i-1)+0.125(1-\Phi)M_{ccBbAA}(i-1)(1-\Phi)F_{CcBbAA}(i-1)+0.25(1-\Phi)M_{ccBbAA}(i-1)\Phi F_{CcBbAA}(i-1)+0.25(1-\Phi)M_{ccBbAA}(i-1)F_{CcBBAA}(i-1)+0.25\Phi M_{ccBbAA}(i-1)(1-\Phi)F_{ccBbAa}(i-1)+0.5\Phi M_{ccBbAA}(i-1)(1-\Phi)F_{ccBBAA}(i-1)+\Phi M_{ccBbAA}(i-1)\Phi F_{CcBBAA}(i-1)+\Phi M_{ccBbAA}(i-1)F_{CcBBAA}(i-1)+0.125\Phi M_{ccBbAA}(i-1)(1-\Phi)(1-\Phi)F_{CcBbAa}(i-1)+0.25\Phi M_{ccBbAA}(i-1)\Phi(1-\Phi)F_{CcBbAa}(i-1)+0.25\Phi M_{ccBbAA}(i-1)(1-\Phi)\Phi F_{CcBbAa}(i-1)+0.5\Phi M_{ccBbAA}(i-1)\Phi\Phi F_{CcBbAa}(i-1)+0.25\Phi M_{ccBbAA}(i-1)(1-\Phi)F_{CcBbAA}(i-1)+0.5\Phi M_{ccBbAA}(i-1)\Phi F_{CcBbAA}(i-1)+0.5\Phi M_{ccBbAA}(i-1)F_{CcBBAA}(i-1)+0.5M_{ccBbAA}(i-1)(1-\Phi)F_{ccBbAa}(i-1)+M_{ccBbAA}(i-1)\Phi F_{CcBBAA}(i-1)+M_{ccBbAA}(i-1)F_{CcBBAA}(i-1)+0.125M_{ccBbAA}(i-1)(1-\Phi)(1-\Phi)F_{CcBbAa}(i-1)+0.25M_{ccBbAA}(i-1)\Phi(1-\Phi)F_{CcBbAa}(i-1)+0.25M_{ccBbAA}(i-1)(1-\Phi)\Phi F_{CcBbAa}(i-1)+0.5M_{ccBbAA}(i-1)\Phi\Phi F_{CcBbAa}(i-1)+0.25M_{ccBbAA}(i-1)(1-\Phi)F_{CcBbAA}(i-1)+0.5M_{ccBbAA}(i-1)\Phi F_{CcBbAA}(i-1)+0.5M_{ccBbAA}(i-1)F_{CcBBAA}(i-1)+0.03125(1-\Phi)(1-\Phi)M_{CcBbAa}(i-1)(1-\Phi)F_{CcBbAa}(i-1)+0.0625(1-\Phi)(1-\Phi)M_{CcBbAa}(i-1)\Phi F_{CcBbAa}(i-1)+0.0625(1-\Phi)(1-\Phi)M_{CcBbAa}(i-1)(1-\Phi)F_{CcBbAA}(i-1)+0.125(1-\Phi)(1-\Phi)M_{CcBbAa}(i-1)F_{CcBBAA}(i-1)+0.015625(1-\Phi)(1-\Phi)M_{CcBbAa}(i-1)(1-\Phi)(1-\Phi)F_{CcBbAa}(i-1)+0.03125(1-\Phi)(1-\Phi)M_{CcBbAa}(i-1)\Phi(1-\Phi)F_{CcBbAa}(i-1)+0.03125(1-\Phi)(1-\Phi)M_{CcBbAa}(i-1)(1-\Phi)F_{CcBbAA}(i-1)+0.0625(1-\Phi)(1-\Phi)M_{CcBbAa}(i-1)\Phi F_{CcBbAA}(i-1)+0.03125(1-\Phi)(1-\Phi)M_{CcBbAa}(i-1)(1-\Phi)F_{CcBBAA}(i-1)+0.0625(1-\Phi)(1-\Phi)M_{CcBbAa}(i-1)\Phi F_{CcBBAA}(i-1)+0.0625(1-\Phi)(1-\Phi)M_{CcBbAa}(i-1)F_{CcBBAA}(i-1)+0.125\Phi(1-\Phi)M_{CcBbAa}(i-1)F_{CcBBAA}(i-1)+0.125\Phi(1-\Phi)M_{CcBbAa}(i-1)(1-\Phi)F_{CcBBAA}(i-1)+0.25\Phi(1-\Phi)M_{CcBbAa}(i-1)\Phi F_{CcBBAA}(i-1)+0.25\Phi(1-\Phi)M_{CcBbAa}(i-1)F_{CcBBAA}(i-1)+0.03125\Phi(1-\Phi)M_{CcBbAa}(i-1)(1-\Phi)(1-\Phi)F_{CcBbAa}(i-1)+$$





$$\begin{aligned}
& 1)(1-\Phi)F_{CcBbAa}(i-1)+0.125M_{ccBbaa}(i-1)(1-\Phi)F_{CcBbAA}(i-1)+0.25M_{ccBbaa}(i-1)F_{CCbbAa}(i-1)+ \\
& 0.5M_{ccBbaa}(i-1)F_{CCbbAA}(i-1)+0.125M_{ccBbaa}(i-1)(1-\Phi)(1-\Phi)F_{CCbBbAa}(i-1)+0.25M_{ccBbaa}(i-1)(1- \\
& \Phi)F_{CCbBbAA}(i-1)+0.125(1-\Phi)M_{ccBbAa}(i-1)F_{CcbbAa}(i-1)+0.125(1-\Phi)M_{ccBbAa}(i-1)F_{CcbbAa}(i-1)+ \\
& 0.125(1-\Phi)M_{ccBbAa}(i-1)F_{CcbbAA}(i-1)+0.0625(1-\Phi)M_{ccBbAa}(i-1)(1-\Phi)F_{CcBbaa}(i-1)+0.0625(1- \\
& \Phi)M_{ccBbAa}(i-1)(1-\Phi)(1-\Phi)F_{CcBbAa}(i-1)+0.0625(1-\Phi)M_{ccBbAa}(i-1)(1-\Phi)\Phi F_{CcBbAa}(i-1)+ \\
& 0.0625(1-\Phi)M_{ccBbAa}(i-1)(1-\Phi)F_{CcBbAA}(i-1)+0.25(1-\Phi)M_{ccBbAa}(i-1)F_{CCbbAa}(i-1)+0.25(1- \\
& \Phi)M_{ccBbAa}(i-1)F_{CCbbAA}(i-1)+0.25(1-\Phi)M_{ccBbAa}(i-1)F_{CCbBbAA}(i-1)+0.125(1-\Phi)M_{ccBbAa}(i-1)(1- \\
& \Phi)F_{CCbBbaa}(i-1)+0.125(1-\Phi)M_{ccBbAa}(i-1)(1-\Phi)(1-\Phi)F_{CCbBbAa}(i-1)+0.125(1-\Phi)M_{ccBbAa}(i-1) \\
& (1-\Phi)F_{CCbBbAA}(i-1)+0.25\Phi M_{ccBbAa}(i-1)F_{CcbbAa}(i-1)+0.125\Phi M_{ccBbAa}(i-1)F_{CcbbAa}(i-1)+ \\
& 0.125\Phi M_{ccBbAa}(i-1)(1-\Phi)F_{CcBbaa}(i-1)+0.0625\Phi M_{ccBbAa}(i-1)(1-\Phi)(1-\Phi)F_{CcBbAa}(i-1)+ \\
& 0.5\Phi M_{ccBbAa}(i-1)F_{CcbbAa}(i-1)+0.25\Phi M_{ccBbAa}(i-1)F_{CCbbAa}(i-1)+0.25\Phi M_{ccBbAa}(i-1)(1- \\
& \Phi)F_{CCbBbaa}(i-1)+0.125\Phi M_{ccBbAa}(i-1)(1-\Phi)(1-\Phi)F_{CCbBbAa}(i-1)+0.25M_{ccBbAA}(i-1)F_{CcbbAa}(i- \\
& 1)+0.125M_{ccBbAA}(i-1)F_{CcbbAa}(i-1)+0.125M_{ccBbAA}(i-1)(1-\Phi)F_{CcBbaa}(i-1)+0.0625M_{ccBbAA}(i- \\
& 1)(1-\Phi)(1-\Phi)F_{CcBbAa}(i-1)+0.5M_{ccBbAA}(i-1)F_{CCbbAa}(i-1)+0.25M_{ccBbAA}(i-1)F_{CCbbAA}(i- \\
& 1)+0.25M_{ccBbAA}(i-1)(1-\Phi)F_{CCbBbaa}(i-1)+0.125M_{ccBbAA}(i-1)(1-\Phi)(1-\Phi)F_{CCbBbAa}(i-1)+ \\
& 0.25M_{CcbbAa}(i-1)F_{CcbbAa}(i-1)+0.5M_{CcbbAa}(i-1)F_{CcbbAA}(i-1)+0.125M_{CcbbAa}(i-1)(1-\Phi)F_{CcBbAa}(i- \\
& 1)+0.25M_{CcbbAa}(i-1)\Phi F_{CcBbAa}(i-1)+0.25M_{CcbbAa}(i-1)F_{CcBbAA}(i-1)+0.25M_{CcbbAa}(i-1)F_{CcbbAa}(i- \\
& 1)+0.5M_{CcbbAa}(i-1)F_{CcbbAA}(i-1)+0.125M_{CcbbAa}(i-1)(1-\Phi)(1-\Phi)F_{CcBbAa}(i-1)+0.25M_{CcbbAa}(i- \\
& 1)(1-\Phi)\Phi F_{CcBbAa}(i-1)+0.25M_{CcbbAa}(i-1)(1-\Phi)F_{CcBbAA}(i-1)+0.25M_{CcbbAa}(i-1)F_{CcbbAa}(i-1)+ \\
& 0.5M_{CcbbAa}(i-1)F_{CCbbAA}(i-1)+0.125M_{CcbbAa}(i-1)(1-\Phi)(1-\Phi)F_{CCbBbAa}(i-1)+0.25M_{CcbbAa}(i-1)(1- \\
& \Phi)F_{CCbBbAA}(i-1)+0.25M_{CcbbAa}(i-1)F_{CcbbAa}(i-1)+0.25M_{CcbbAa}(i-1)F_{CcbbAa}(i-1)+0.25M_{CcbbAa}(i- \\
& 1)F_{CcbbAA}(i-1)+0.125M_{CcbbAa}(i-1)F_{CcBbaa}(i-1)+0.125M_{CcbbAa}(i-1)(1-\Phi)F_{CcBbAa}(i-1)+ \\
& 0.125M_{CcbbAa}(i-1)\Phi F_{CcBbAa}(i-1)+0.125M_{CcbbAa}(i-1)F_{CcBbAA}(i-1)+0.25M_{CcbbAa}(i-1)F_{CcbbAa}(i- \\
& 1)+0.25M_{CcbbAa}(i-1)F_{CcbbAa}(i-1)+0.25M_{CcbbAa}(i-1)F_{CcbbAA}(i-1)+0.125M_{CcbbAa}(i-1)(1-\Phi) \\
& F_{CcBbAa}(i-1)+0.125M_{CcbbAa}(i-1)(1-\Phi)(1-\Phi)F_{CcBbAa}(i-1)+0.125M_{CcbbAa}(i-1)(1-\Phi)\Phi F_{CcBbAa}(i- \\
& 1)+0.125M_{CcbbAa}(i-1)(1-\Phi)F_{CcBbAA}(i-1)+0.25M_{CcbbAa}(i-1)F_{CCbbaa}(i-1)+0.25M_{CcbbAa}(i- \\
& 1)F_{CCbBbAa}(i-1)+0.25M_{CcbbAa}(i-1)F_{CCbBbAA}(i-1)+0.125M_{CcbbAa}(i-1)(1-\Phi)F_{CCbBbaa}(i-1)+ \\
& 0.125M_{CcbbAa}(i-1)(1-\Phi)(1-\Phi)F_{CCbBbAA}(i-1)+0.125M_{CcbbAa}(i-1)(1-\Phi)F_{CCbBbAA}(i-1)+0.5M_{CcbbAA}(i- \\
& 1)F_{CcbbAa}(i-1)+0.25M_{CcbbAA}(i-1)F_{CcbbAa}(i-1)+0.25M_{CcbbAA}(i-1)F_{CcBbaa}(i-1)+0.125M_{CcbbAA}(i- \\
& 1)(1-\Phi)F_{CcBbAa}(i-1)+0.5M_{CcbbAA}(i-1)F_{CcbbAa}(i-1)+0.25M_{CcbbAA}(i-1)F_{CcbbAa}(i-1)+0.25M_{CcbbAA}(i- \\
& 1)(1-\Phi)F_{CcBbaa}(i-1)+0.125M_{CcbbAA}(i-1)(1-\Phi)(1-\Phi)F_{CcBbAa}(i-1)+0.5M_{CcbbAA}(i-1)F_{CCbbaa}(i- \\
& 1)+0.25M_{CcbbAA}(i-1)F_{CCbBbAa}(i-1)+0.25M_{CcbbAA}(i-1)(1-\Phi)F_{CCbBbaa}(i-1)+0.125M_{CcbbAA}(i- \\
& 1)(1-\Phi)(1-\Phi)F_{CCbBbAa}(i-1)+0.125(1-\Phi)M_{CcBbaa}(i-1)F_{CcbbAa}(i-1)+0.25(1-\Phi)M_{CcBbaa}(i- \\
& 1)F_{CcbbAA}(i-1)+0.0625(1-\Phi)M_{CcBbaa}(i-1)(1-\Phi)F_{CcBbAa}(i-1)+0.125(1-\Phi)M_{CcBbaa}(i-1)\Phi F_{CcBbAa}(i- \\
& 1)+0.125(1-\Phi)M_{CcBbaa}(i-1)F_{CcbbAa}(i-1)+0.125(1-\Phi)M_{CcBbaa}(i-1)F_{CcBbAA}(i-1)+0.25(1-\Phi) \\
& F_{CcBbaa}(i-1)+0.125(1-\Phi)M_{CcBbaa}(i-1)F_{CcBbaa}(i-1)+0.125(1-\Phi)M_{CcBbaa}(i-1)(1-\Phi)F_{CcBbAa}(i- \\
& 1)+0.25(1-\Phi)M_{CcBbaa}(i-1)F_{CcbbAA}(i-1)+0.0625(1-\Phi)M_{CcBbaa}(i-1)F_{CcbbAa}(i-1)+0.25(1- \\
& \Phi)M_{CcBbaa}(i-1)F_{CCbBbAa}(i-1)+0.0625(1-\Phi)M_{CcBbaa}(i-1)(1-\Phi)(1-\Phi)F_{CcBbAa}(i-1)+0.125(1- \\
& \Phi)M_{CcBbaa}(i-1)F_{CcbbAA}(i-1)+0.25(1-\Phi)M_{CcBbaa}(i-1)F_{CcbbAa}(i-1)+0.125(1-\Phi)(1- \\
& \Phi)M_{CcBbAa}(i-1)F_{CcbbAa}(i-1)+0.125(1-\Phi)(1-\Phi)M_{CcBbAa}(i-1)F_{CcbbAa}(i-1)+0.125(1-\Phi)(1- \\
& \Phi)M_{CcBbAa}(i-1)F_{CcbbAA}(i-1)+0.0625(1-\Phi)(1-\Phi)M_{CcBbAa}(i-1)F_{CcBbaa}(i-1)+0.0625(1-\Phi)(1- \\
& \Phi)M_{CcBbAa}(i-1)F_{CcbbAA}(i-1)+0.0625(1-\Phi)(1-\Phi)M_{CcBbAa}(i-1)\Phi F_{CcBbAa}(i-1)+0.0625(1- \\
& \Phi)(1-\Phi)M_{CcBbAa}(i-1)F_{CcBbAA}(i-1)+0.125(1-\Phi)(1-\Phi)M_{CcBbAa}(i-1)F_{CcbbAa}(i-1)+0.125(1-\Phi)(1- \\
& \Phi)M_{CcBbAa}(i-1)F_{CcbbAa}(i-1)+0.125(1-\Phi)(1-\Phi)M_{CcBbAa}(i-1)F_{CcbbAA}(i-1)+0.0625(1-\Phi)(1- \\
& \Phi)M_{CcBbAa}(i-1)F_{CcbbAA}(i-1)+0.25(1-\Phi)\Phi M_{CcBbAa}(i-1)F_{CcbbAa}(i-1)+0.125(1-\Phi)\Phi M_{CcBbAa}(i- \\
& 1)F_{CcbbAa}(i-1)+0.125(1-\Phi)\Phi M_{CcBbAa}(i-1)F_{CcBbaa}(i-1)+0.0625(1-\Phi)\Phi M_{CcBbAa}(i-1)F_{CcbbAa}(i- \\
& 1)(1-\Phi)F_{CcBbAa}(i-1)+0.25(1-\Phi)\Phi M_{CcBbAa}(i-1)F_{CcbbAa}(i-1)+0.125(1-\Phi)\Phi M_{CcBbAa}(i-1)F_{CcbbAA}(i- \\
& 1)+0.125(1-\Phi)\Phi M_{CcBbAa}(i-1)(1-\Phi)F_{CcBbaa}(i-1)+0.0625(1-\Phi)\Phi M_{CcBbAa}(i-1)(1-\Phi)(1- \\
& \Phi)F_{CcBbAa}(i-1)+0.25(1-\Phi)\Phi M_{CcBbAa}(i-1)F_{CCbbaa}(i-1)+0.125(1-\Phi)\Phi M_{CcBbAa}(i-1)F_{CCbBbAa}(i- \\
& 1)+0.125(1-\Phi)\Phi M_{CcBbAa}(i-1)(1-\Phi)F_{CCbBbaa}(i-1)+0.0625(1-\Phi)\Phi M_{CcBbAa}(i-1)(1-\Phi)(1- \\
& \Phi)F_{CCbBbAa}(i-1)+0.25(1-\Phi)M_{CcBbAA}(i-1)F_{CcbbAa}(i-1)+0.125(1-\Phi)M_{CcBbAA}(i-1)F_{CcbbAa}(i- \\
& 1)+0.125(1-\Phi)M_{CcBbAA}(i-1)F_{CcbbAa}(i-1)+0.0625(1-\Phi)M_{CcBbAA}(i-1)(1-\Phi)F_{CcBbAa}(i-1) \\
& +0.125(1-\Phi)M_{CcBbAA}(i-1)F_{CcBbaa}(i-1)+0.0625(1-\Phi)M_{CcBbAA}(i-1)(1-\Phi)F_{CcBbAa}(i-1)+
\end{aligned}$$





$$\begin{aligned}
& 1) + 0.25M_{CcbbAa}(i-1)F_{CcbbAA}(i-1) + 0.0625M_{CcbbAa}(i-1)(1-\Phi)(1-\Phi)F_{CcBbAa}(i-1) + 0.125M_{CcbbAa}(i-1) \\
& (1-\Phi)\Phi F_{CcBbAa}(i-1) + 0.125M_{CcbbAa}(i-1)(1-\Phi)F_{CcBbAA}(i-1) + 0.125M_{CcbbAa}(i-1)F_{CcbbAA}(i-1) + \\
& 0.25M_{CcbbAa}(i-1)F_{CCbBAa}(i-1) + 0.0625M_{CcbbAa}(i-1)(1-\Phi)(1-\Phi)F_{CCBbAa}(i-1) + 0.125M_{CcbbAa}(i-1) \\
& (1-\Phi)F_{CCBbAA}(i-1) + 0.25M_{CcbbAA}(i-1)F_{ccbbAa}(i-1) + 0.5M_{CcbbAA}(i-1)F_{ccbbAA}(i-1) + 0.125M_{CcbbAA}(i-1) \\
& (1-\Phi)F_{ccBbAa}(i-1) + 0.25M_{CcbbAA}(i-1)\Phi F_{ccBbAa}(i-1) + 0.25M_{CcbbAA}(i-1)F_{ccBbAA}(i-1) + \\
& 0.25M_{CcbbAA}(i-1)F_{CcbbAa}(i-1) + 0.5M_{CcbbAA}(i-1)F_{CcbbAA}(i-1) + 0.125M_{CcbbAA}(i-1)(1-\Phi)(1-\Phi) \\
& F_{CcBbAa}(i-1) + 0.25M_{CcbbAA}(i-1)(1-\Phi)\Phi F_{CcBbAa}(i-1) + 0.25M_{CcbbAA}(i-1)(1-\Phi)F_{CcBbAA}(i-1) \\
& + 0.25M_{CcbbAA}(i-1)F_{CCbBAa}(i-1) + 0.5M_{CcbbAA}(i-1)F_{CCbBAa}(i-1) + 0.125M_{CcbbAA}(i-1)(1-\Phi)(1-\Phi) \\
& (1-\Phi)F_{CcBbAa}(i-1) + 0.25M_{CcbbAA}(i-1)(1-\Phi)\Phi F_{CcBbAa}(i-1) + 0.0625(1-\Phi)(1-\Phi)M_{CcBbAa}(i-1) \\
& F_{ccbbAa}(i-1) + 0.125(1-\Phi)(1-\Phi)M_{CcBbAa}(i-1)F_{ccbbAA}(i-1) + 0.03125(1-\Phi)(1-\Phi)M_{CcBbAa}(i-1)(1-\Phi) \\
& F_{ccBbAa}(i-1) + 0.0625(1-\Phi)(1-\Phi)M_{CcBbAa}(i-1)\Phi F_{ccBbAa}(i-1) + 0.0625(1-\Phi)(1-\Phi)M_{CcBbAa}(i-1) \\
& F_{ccBbAA}(i-1) + 0.0625(1-\Phi)(1-\Phi)M_{CcBbAa}(i-1)F_{CcbbAa}(i-1) + 0.125(1-\Phi)(1-\Phi)M_{CcBbAa}(i-1) \\
& F_{CcbbAA}(i-1) + 0.03125(1-\Phi)(1-\Phi)M_{CcBbAa}(i-1)(1-\Phi)(1-\Phi)F_{CcBbAa}(i-1) + 0.0625(1-\Phi)(1-\Phi) \\
& (1-\Phi)M_{CcBbAa}(i-1)(1-\Phi)\Phi F_{CcBbAa}(i-1) + 0.0625(1-\Phi)(1-\Phi)M_{CcBbAa}(i-1)(1-\Phi)F_{CcBbAA}(i-1) + \\
& 0.0625(1-\Phi)(1-\Phi)M_{CcBbAa}(i-1)F_{CCbBAa}(i-1) + 0.125(1-\Phi)(1-\Phi)M_{CcBbAa}(i-1)F_{CCbBAa}(i-1) + \\
& 0.03125(1-\Phi)(1-\Phi)M_{CcBbAa}(i-1)(1-\Phi)(1-\Phi)F_{CCBbAa}(i-1) + 0.0625(1-\Phi)(1-\Phi)M_{CcBbAa}(i-1)(1-\Phi) \\
& F_{CCBbAA}(i-1) + 0.125(1-\Phi)\Phi M_{CcBbAa}(i-1)F_{ccbbAa}(i-1) + 0.25(1-\Phi)\Phi M_{CcBbAa}(i-1)F_{ccbbAA}(i-1) \\
& + 0.0625(1-\Phi)\Phi M_{CcBbAa}(i-1)(1-\Phi)F_{ccBbAa}(i-1) + 0.125(1-\Phi)\Phi M_{CcBbAa}(i-1)\Phi F_{ccBbAa}(i-1) \\
& + 0.125(1-\Phi)\Phi M_{CcBbAa}(i-1)F_{ccBbAA}(i-1) + 0.125(1-\Phi)\Phi M_{CcBbAa}(i-1)F_{CcbbAa}(i-1) + 0.25(1-\Phi) \\
& \Phi M_{CcBbAa}(i-1)F_{CcbbAA}(i-1) + 0.0625(1-\Phi)\Phi M_{CcBbAa}(i-1)(1-\Phi)(1-\Phi)F_{CcBbAa}(i-1) + 0.125(1-\Phi) \\
& \Phi M_{CcBbAa}(i-1)(1-\Phi)\Phi F_{CcBbAa}(i-1) + 0.125(1-\Phi)\Phi M_{CcBbAa}(i-1)(1-\Phi)F_{CcBbAA}(i-1) + 0.125(1-\Phi) \\
& \Phi M_{CcBbAa}(i-1)F_{CCbBAa}(i-1) + 0.25(1-\Phi)\Phi M_{CcBbAa}(i-1)F_{CCbBAa}(i-1) + 0.0625(1-\Phi)\Phi M_{CcBbAa}(i-1) \\
& (1-\Phi)(1-\Phi)F_{CCBbAa}(i-1) + 0.125(1-\Phi)\Phi M_{CcBbAa}(i-1)(1-\Phi)F_{CCBbAA}(i-1) + 0.125(1-\Phi) \\
& (1-\Phi)M_{CcBbAA}(i-1)F_{ccbbAa}(i-1) + 0.25(1-\Phi)M_{CcBbAA}(i-1)F_{ccbbAA}(i-1) + 0.0625(1-\Phi)M_{CcBbAA}(i-1)(1-\Phi) \\
& F_{ccBbAa}(i-1) + 0.125(1-\Phi)M_{CcBbAA}(i-1)\Phi F_{ccBbAa}(i-1) + 0.125(1-\Phi)M_{CcBbAA}(i-1)F_{ccBbAA}(i-1) \\
& + 0.125(1-\Phi)M_{CcBbAA}(i-1)F_{CcbbAa}(i-1) + 0.25(1-\Phi)M_{CcBbAA}(i-1)F_{CcbbAA}(i-1) + 0.0625(1-\Phi) \\
& M_{CcBbAA}(i-1)(1-\Phi)(1-\Phi)F_{CcBbAa}(i-1) + 0.125(1-\Phi)M_{CcBbAA}(i-1)(1-\Phi)\Phi F_{CcBbAa}(i-1) + \\
& 0.125(1-\Phi)M_{CcBbAA}(i-1)(1-\Phi)F_{CcBbAA}(i-1) + 0.125(1-\Phi)M_{CcBbAA}(i-1)F_{CCbBAa}(i-1) + \\
& 0.25(1-\Phi)M_{CcBbAA}(i-1)F_{CCbBAa}(i-1) + 0.0625(1-\Phi)M_{CcBbAA}(i-1)(1-\Phi)(1-\Phi)F_{CCbBAa}(i-1) + \\
& 0.125(1-\Phi)M_{CcBbAA}(i-1)(1-\Phi)F_{CCbBAa}(i-1) + 0.25M_{CCbbAa}(i-1)F_{ccbbAa}(i-1) + 0.5M_{CCbbAa}(i-1) \\
& F_{ccbbAA}(i-1) + 0.125M_{CCbbAa}(i-1)(1-\Phi)F_{ccBbAa}(i-1) + 0.25M_{CCbbAa}(i-1)\Phi F_{ccBbAa}(i-1) + \\
& 0.25M_{CCbbAa}(i-1)F_{ccBbAA}(i-1) + 0.125M_{CCbbAa}(i-1)F_{CcbbAa}(i-1) + 0.25M_{CCbbAa}(i-1)F_{CcbbAA}(i-1) \\
& + 0.0625M_{CCbbAa}(i-1)(1-\Phi)(1-\Phi)F_{CcBbAa}(i-1) + 0.125M_{CCbbAa}(i-1)(1-\Phi)\Phi F_{CcBbAa}(i-1) \\
& + 0.125M_{CCbbAa}(i-1)(1-\Phi)F_{CcBbAA}(i-1) + 0.25M_{CCbbAa}(i-1)(1-\Phi)\Phi F_{CcBbAa}(i-1) + \\
& 0.125(1-\Phi)(1-\Phi)M_{CCBbAa}(i-1)\Phi F_{ccBbAa}(i-1) + 0.125(1-\Phi)(1-\Phi)M_{CCBbAa}(i-1)F_{ccBbAA}(i-1) + \\
& 0.0625(1-\Phi)(1-\Phi)M_{CCBbAa}(i-1)F_{CcbbAa}(i-1) + 0.125(1-\Phi)(1-\Phi)M_{CCBbAa}(i-1)F_{CcbbAA}(i-1) + \\
& 0.03125(1-\Phi)(1-\Phi)M_{CCBbAa}(i-1)(1-\Phi)(1-\Phi)F_{CcBbAa}(i-1) + 0.0625(1-\Phi)(1-\Phi)M_{CCBbAa}(i-1) \\
& (1-\Phi)\Phi F_{CcBbAa}(i-1) + 0.0625(1-\Phi)(1-\Phi)M_{CCBbAa}(i-1)(1-\Phi)F_{CcBbAA}(i-1) + 0.25(1-\Phi) \\
& (1-\Phi)\Phi M_{CCBbAa}(i-1)F_{ccbbAa}(i-1) + 0.5(1-\Phi)\Phi M_{CCBbAa}(i-1)F_{ccbbAA}(i-1) + 0.125(1-\Phi)\Phi M_{CCBbAa}(i-1) \\
& (1-\Phi)F_{ccBbAa}(i-1) + 0.25(1-\Phi)\Phi M_{CCBbAa}(i-1)\Phi F_{ccBbAa}(i-1) + 0.25(1-\Phi)\Phi M_{CCBbAa}(i-1) \\
& F_{ccBbAA}(i-1) + 0.125(1-\Phi)\Phi M_{CCBbAa}(i-1)F_{CcbbAa}(i-1) + 0.25(1-\Phi)\Phi M_{CCBbAa}(i-1)F_{CcbbAA}(i-1) \\
& + 0.0625(1-\Phi)\Phi M_{CCBbAa}(i-1)(1-\Phi)(1-\Phi)F_{CcBbAa}(i-1) + 0.125(1-\Phi)\Phi M_{CCBbAa}(i-1)(1-\Phi) \\
& \Phi F_{CcBbAa}(i-1) + 0.125(1-\Phi)\Phi M_{CCBbAa}(i-1)(1-\Phi)F_{CcBbAA}(i-1) + 0.25(1-\Phi)M_{CCBbAA}(i-1) \\
& F_{ccbbAa}(i-1) + 0.5(1-\Phi)M_{CCBbAA}(i-1)F_{ccbbAA}(i-1) + 0.125(1-\Phi)M_{CCBbAA}(i-1)(1-\Phi)F_{ccBbAa}(i-1) \\
& + 0.25(1-\Phi)M_{CCBbAA}(i-1)\Phi F_{ccBbAa}(i-1) + 0.25(1-\Phi)M_{CCBbAA}(i-1)F_{ccBbAA}(i-1) + 0.125(1-\Phi) \\
& M_{CCBbAA}(i-1)F_{CcbbAa}(i-1) + 0.25(1-\Phi)M_{CCBbAA}(i-1)F_{CcbbAA}(i-1) + 0.0625(1-\Phi)M_{CCBbAA}(i-1) \\
& (1-\Phi)(1-\Phi)F_{CcBbAa}(i-1) + 0.125(1-\Phi)M_{CCBbAA}(i-1)(1-\Phi)\Phi F_{CcBbAa}(i-1) + 0.125(1-\Phi) \\
& \Phi M_{CCBbAA}(i-1)(1-\Phi)F_{CcBbAA}(i-1)],
\end{aligned}$$

$$\begin{aligned}
M_{CcBbaa}^e &= \left( \frac{\bar{\Omega}_{CcBbaa}}{2} \right) [0.25M_{ccbbaa}(i-1)(1-\Phi)F_{CcBbaa}(i-1) + 0.5M_{ccbbaa}(i-1)\Phi F_{CcBbaa}(i-1) \\
& + 0.125M_{ccbbaa}(i-1)(1-\Phi)(1-\Phi)F_{CcBbAa}(i-1) + 0.25M_{ccbbaa}(i-1)\Phi(1-\Phi)F_{CcBbAa}(i-1) + \\
& 0.5M_{ccbbaa}(i-1)F_{CcBBAa}(i-1) + 0.25M_{ccbbaa}(i-1)(1-\Phi)F_{CcBBAa}(i-1) + 0.5M_{ccbbaa}(i-1)(1-\Phi)
\end{aligned}$$

















$$\begin{aligned}
& \Phi)M_{CCBbAA}(i-1)(1-\Phi)F_{CcBBaA}(i-1)+\Phi M_{CCBbAA}(i-1)F_{ccbbAa}(i-1)+0.5\Phi M_{CCBbAA}(i-1)F_{ccbbAa}(i-1) \\
& +0.5\Phi M_{CCBbAA}(i-1)F_{ccBbaa}(i-1)+0.25\Phi M_{CCBbAA}(i-1)(1-\Phi)F_{CcBbAa}(i-1)+0.5\Phi M_{CCBbAA}(i-1) \\
& F_{Ccbbaa}(i-1)+0.25\Phi M_{CCBbAA}(i-1)F_{Ccbbaa}(i-1)+0.25\Phi M_{CCBbAA}(i-1)(1-\Phi)F_{CcBbaa}(i-1)+ \\
& 0.125\Phi M_{CCBbAA}(i-1)(1-\Phi)(1-\Phi)F_{CcBbAa}(i-1)+0.5M_{CCBBaa}(i-1)F_{cbbAa}(i-1)+M_{CCBBaa}(i-1) \\
& F_{cbbAa}(i-1)+0.25M_{CCBBaa}(i-1)(1-\Phi)F_{CcBbAa}(i-1)+0.5M_{CCBBaa}(i-1)\Phi F_{CcBbAa}(i-1)+ \\
& 0.5M_{CCBBaa}(i-1)F_{CcBbAa}(i-1)+0.25M_{CCBBaa}(i-1)F_{Ccbbaa}(i-1)+0.5M_{CCBBaa}(i-1)F_{Ccbbaa}(i-1) \\
& +0.125M_{CCBBaa}(i-1)(1-\Phi)(1-\Phi)F_{CcBbAa}(i-1)+0.25M_{CCBBaa}(i-1)(1-\Phi)\Phi F_{CcBbAa}(i-1)+ \\
& 0.25M_{CCBBaa}(i-1)(1-\Phi)F_{CcBbAa}(i-1)+0.5(1-\Phi)M_{CCBBaa}(i-1)F_{cbbAa}(i-1)+0.5(1-\Phi)M_{CCBBaa}(i-1) \\
& F_{cbbAa}(i-1)+0.5(1-\Phi)M_{CCBBaa}(i-1)F_{cbbAa}(i-1)+0.25(1-\Phi)M_{CCBBaa}(i-1)F_{CcBbaa}(i-1)+ \\
& 0.25(1-\Phi)M_{CCBBaa}(i-1)(1-\Phi)F_{CcBbAa}(i-1)+0.25(1-\Phi)M_{CCBBaa}(i-1)\Phi F_{CcBbAa}(i-1)+0.25(1-\Phi) \\
& M_{CCBBaa}(i-1)F_{CcBbAa}(i-1)+0.25(1-\Phi)M_{CCBBaa}(i-1)F_{Ccbbaa}(i-1)+0.25(1-\Phi)M_{CCBBaa}(i-1) \\
& F_{Ccbbaa}(i-1)+0.125(1-\Phi)M_{CCBBaa}(i-1)(1-\Phi)F_{CcBbaa}(i-1)+0.125(1-\Phi)M_{CCBBaa}(i-1)(1-\Phi) \\
& \Phi F_{CcBbAa}(i-1)+0.125(1-\Phi)M_{CCBBaa}(i-1)(1-\Phi)F_{CcBbAa}(i-1)+\Phi M_{CCBBaa}(i-1)F_{cbbAa}(i-1) \\
& +0.5\Phi M_{CCBBaa}(i-1)F_{cbbAa}(i-1)+0.5\Phi M_{CCBBaa}(i-1)F_{cbbAa}(i-1)+0.25\Phi M_{CCBBaa}(i-1) \\
& (1-\Phi)F_{CcBbAa}(i-1)+0.5\Phi M_{CCBBaa}(i-1)F_{Ccbbaa}(i-1)+0.25\Phi M_{CCBBaa}(i-1)F_{Ccbbaa}(i-1)+ \\
& 0.25\Phi M_{CCBBaa}(i-1)(1-\Phi)F_{CcBbaa}(i-1)+0.125\Phi M_{CCBBaa}(i-1)(1-\Phi)(1-\Phi)F_{CcBbAa}(i-1)+ \\
& M_{CCBBaa}(i-1)F_{cbbAa}(i-1)+0.5M_{CCBBaa}(i-1)F_{cbbAa}(i-1)+0.5M_{CCBBaa}(i-1)F_{CcBbaa}(i-1)+ \\
& 0.25M_{CCBBaa}(i-1)(1-\Phi)F_{CcBbAa}(i-1)+0.5M_{CCBBaa}(i-1)F_{Ccbbaa}(i-1)+0.25M_{CCBBaa}(i-1) \\
& F_{Ccbbaa}(i-1)+0.25M_{CCBBaa}(i-1)(1-\Phi)F_{CcBbaa}(i-1)+0.125M_{CCBBaa}(i-1)(1-\Phi)(1-\Phi) \\
& \Phi F_{CcBbAa}(i-1)],
\end{aligned}$$

$$\begin{aligned}
M_{CcBbAA}^e & = \left( \frac{\Omega_{CcBbAA}}{2} \right) [0.0625M_{cbbAa}(i-1)(1-\Phi)(1-\Phi)F_{CcBbAa}(i-1)+0.125M_{cbbAa}(i-1)\Phi(1-\Phi) \\
& F_{CcBbAa}(i-1)+0.125M_{cbbAa}(i-1)(1-\Phi)\Phi F_{CcBbAa}(i-1)+0.25M_{cbbAa}(i-1)\Phi\Phi F_{CcBbAa}(i-1) \\
& +0.125M_{cbbAa}(i-1)(1-\Phi)F_{CcBbAA}(i-1)+0.25M_{cbbAa}(i-1)\Phi F_{CcBbAA}(i-1)+0.125M_{cbbAa}(i-1) \\
& (1-\Phi)F_{CcBbAA}(i-1)+0.25M_{cbbAa}(i-1)\Phi F_{CcBbAA}(i-1)+0.25M_{cbbAa}(i-1)F_{CcBbAA}(i-1)+ \\
& 0.125M_{cbbAa}(i-1)(1-\Phi)(1-\Phi)F_{CcBbAA}(i-1)+0.25M_{cbbAa}(i-1)\Phi(1-\Phi)F_{CcBbAA}(i-1)+0.25M_{cbbAa}(i-1) \\
& (1-\Phi)\Phi F_{CcBbAA}(i-1)+0.5M_{cbbAa}(i-1)\Phi\Phi F_{CcBbAA}(i-1)+0.25M_{cbbAa}(i-1)(1-\Phi)F_{CcBbAA}(i-1) \\
& +0.5M_{cbbAa}(i-1)\Phi F_{CcBbAA}(i-1)+0.25M_{cbbAa}(i-1)(1-\Phi)F_{CcBbAA}(i-1)+0.5M_{cbbAa}(i-1) \\
& \Phi F_{CcBbAA}(i-1)+0.5M_{cbbAa}(i-1)F_{CcBbAA}(i-1)+0.125M_{cbbAa}(i-1)(1-\Phi)(1-\Phi)F_{CcBbAA}(i-1) \\
& +0.25M_{cbbAa}(i-1)\Phi(1-\Phi)F_{CcBbAA}(i-1)+0.25M_{cbbAa}(i-1)(1-\Phi)\Phi F_{CcBbAA}(i-1)+0.5M_{cbbAa}(i-1) \\
& \Phi\Phi F_{CcBbAA}(i-1)+0.25M_{cbbAa}(i-1)(1-\Phi)F_{CcBbAA}(i-1)+0.5M_{cbbAa}(i-1)\Phi F_{CcBbAA}(i-1)+ \\
& 0.25M_{cbbAa}(i-1)(1-\Phi)F_{CcBbAA}(i-1)+0.5M_{cbbAa}(i-1)\Phi F_{CcBbAA}(i-1)+0.5M_{cbbAa}(i-1)F_{CcBbAA}(i-1) \\
& +0.25M_{cbbAa}(i-1)(1-\Phi)(1-\Phi)F_{CcBbAA}(i-1)+0.5M_{cbbAa}(i-1)\Phi(1-\Phi)F_{CcBbAA}(i-1)+ \\
& 0.5M_{cbbAa}(i-1)(1-\Phi)\Phi F_{CcBbAA}(i-1)+M_{cbbAa}(i-1)\Phi\Phi F_{CcBbAA}(i-1)+0.5M_{cbbAa}(i-1)(1-\Phi) \\
& F_{CcBbAA}(i-1)+M_{cbbAa}(i-1)\Phi F_{CcBbAA}(i-1)+M_{cbbAa}(i-1)F_{CcBbAA}(i-1)+0.0625(1-\Phi)M_{CcBbAA}(i-1) \\
& F_{Ccbbaa}(i-1)+0.125(1-\Phi)M_{CcBbAA}(i-1)F_{Ccbbaa}(i-1)+0.0625(1-\Phi)M_{CcBbAA}(i-1)(1-\Phi)(1-\Phi) \\
& F_{CcBbAa}(i-1)+0.0625(1-\Phi)M_{CcBbAA}(i-1)\Phi(1-\Phi)F_{CcBbAa}(i-1)+0.125(1-\Phi)M_{CcBbAA}(i-1)(1-\Phi) \\
& \Phi F_{CcBbAa}(i-1)+0.125(1-\Phi)M_{CcBbAA}(i-1)(1-\Phi)F_{CcBbAA}(i-1)+0.125(1-\Phi)M_{CcBbAA}(i-1) \\
& (1-\Phi)F_{CcBbAA}(i-1)+0.125(1-\Phi)M_{CcBbAA}(i-1)\Phi(1-\Phi)F_{CcBbAA}(i-1)+0.125(1-\Phi)M_{CcBbAA}(i-1) \\
& (1-\Phi)\Phi F_{CcBbAA}(i-1)+0.25(1-\Phi)M_{CcBbAA}(i-1)\Phi\Phi F_{CcBbAA}(i-1)+0.25(1-\Phi)M_{CcBbAA}(i-1) \\
& (1-\Phi)F_{CcBbAA}(i-1)+0.25(1-\Phi)M_{CcBbAA}(i-1)\Phi F_{CcBbAA}(i-1)+0.25(1-\Phi)M_{CcBbAA}(i-1) \\
& F_{CcBbAA}(i-1)+0.125\Phi M_{CcBbAA}(i-1)F_{Ccbbaa}(i-1)+0.25\Phi M_{CcBbAA}(i-1)F_{Ccbbaa}(i-1)+0.125\Phi M_{CcBbAA}(i-1) \\
& (1-\Phi)(1-\Phi)F_{CcBbAa}(i-1)+0.125\Phi M_{CcBbAA}(i-1)\Phi(1-\Phi)F_{CcBbAa}(i-1)+0.25\Phi M_{CcBbAA}(i-1) \\
& (1-\Phi)\Phi F_{CcBbAa}(i-1)+0.25\Phi M_{CcBbAA}(i-1)\Phi F_{CcBbAa}(i-1)+0.25\Phi M_{CcBbAA}(i-1)(1-\Phi)F_{CcBbAA}(i-1) \\
& +0.25\Phi M_{CcBbAA}(i-1)\Phi F_{CcBbAA}(i-1)+0.25\Phi M_{CcBbAA}(i-1)(1-\Phi)F_{CcBbAA}(i-1)+0.25\Phi M_{CcBbAA}(i-1) \\
& \Phi F_{CcBbAA}(i-1)+0.125\Phi M_{CcBbAA}(i-1)(1-\Phi)F_{CcBbAA}(i-1)+0.25\Phi M_{CcBbAA}(i-1)\Phi F_{CcBbAA}(i-1) \\
& +0.25\Phi M_{CcBbAA}(i-1)F_{CcBbAA}(i-1)+0.25\Phi M_{CcBbAA}(i-1)F_{Ccbbaa}(i-1)+0.5\Phi M_{CcBbAA}(i-1)F_{Ccbbaa}(i-1) \\
& +0.25\Phi M_{CcBbAA}(i-1)(1-\Phi)(1-\Phi)F_{CcBbAa}(i-1)+0.25\Phi M_{CcBbAA}(i-1)\Phi(1-\Phi)F_{CcBbAa}(i-1) \\
& +0.25\Phi M_{CcBbAA}(i-1)(1-\Phi)\Phi F_{CcBbAa}(i-1)+0.5\Phi M_{CcBbAA}(i-1)\Phi\Phi F_{CcBbAa}(i-1)+0.5\Phi M_{CcBbAA}(i-1) \\
& (1-\Phi)F_{CcBbAA}(i-1)+0.5\Phi M_{CcBbAA}(i-1)\Phi F_{CcBbAA}(i-1)+0.25\Phi M_{CcBbAA}(i-1)(1-\Phi)F_{CcBbAA}(i-1) \\
& +0.5\Phi M_{CcBbAA}(i-1)\Phi F_{CcBbAA}(i-1)+0.5\Phi M_{CcBbAA}(i-1)F_{CcBbAA}(i-1)+0.125M_{CcBbAA}(i-1) \\
& F_{Ccbbaa}(i-1)+0.25M_{CcBbAA}(i-1)F_{Ccbbaa}(i-1)+0.125M_{CcBbAA}(i-1)(1-\Phi)(1-\Phi)F_{CcBbAa}(i-1)+
\end{aligned}$$

$$\begin{aligned}
& 0.125M_{ccBbAA}(i-1)\Phi(1-\Phi)F_{CcBbAa}(i-1)+0.25M_{ccBbAA}(i-1)(1-\Phi)\Phi F_{CcBbAa}(i-1)+0.25M_{ccBbAA}(i-1) \\
& \Phi\Phi F_{CcBbAa}(i-1)+0.25M_{ccBbAA}(i-1)(1-\Phi)F_{CcBbAA}(i-1)+0.25M_{ccBbAA}(i-1)\Phi F_{CcBbAA}(i-1)+ \\
& 0.125M_{ccBbAA}(i-1)(1-\Phi)F_{CcBBAA}(i-1)+0.25M_{ccBbAA}(i-1)\Phi F_{CcBBAA}(i-1)+0.25M_{ccBbAA}(i-1) \\
& F_{CcBBAA}(i-1)+0.25M_{ccBbAA}(i-1)F_{CcbbAa}(i-1)+0.5M_{ccBbAA}(i-1)F_{CcbbAA}(i-1)+0.25M_{ccBbAA}(i-1) \\
& (1-\Phi)(1-\Phi)F_{CcbbAa}(i-1)+0.25M_{ccBbAA}(i-1)\Phi(1-\Phi)F_{CcbbAa}(i-1)+0.25M_{ccBbAA}(i-1)(1-\Phi) \\
& \Phi F_{CcbbAa}(i-1)+0.5M_{ccBbAA}(i-1)\Phi\Phi F_{CcbbAa}(i-1)+0.5M_{ccBbAA}(i-1)(1-\Phi)F_{CcbbAA}(i-1) \\
& +0.5M_{ccBbAA}(i-1)\Phi F_{CcbbAA}(i-1)+0.25M_{ccBbAA}(i-1)(1-\Phi)F_{CcBBAA}(i-1)+0.5M_{ccBbAA}(i-1) \\
& \Phi F_{CcBBAA}(i-1)+0.5M_{ccBbAA}(i-1)F_{CcBBAA}(i-1)+0.125(1-\Phi)M_{ccBbAA}(i-1)F_{CcbbAa}(i-1)+ \\
& 0.25(1-\Phi)M_{ccBbAA}(i-1)F_{CcbbAA}(i-1)+0.0625(1-\Phi)M_{ccBbAA}(i-1)(1-\Phi)(1-\Phi)F_{CcBbAa}(i-1)+ \\
& 0.125(1-\Phi)M_{ccBbAA}(i-1)(1-\Phi)\Phi F_{CcBbAa}(i-1)+0.125(1-\Phi)M_{ccBbAA}(i-1)(1-\Phi)F_{CcBbAA}(i-1) \\
& +0.25(1-\Phi)M_{ccBbAA}(i-1)F_{CcbbAa}(i-1)+0.5(1-\Phi)M_{ccBbAA}(i-1)F_{CcbbAA}(i-1)+0.125(1-\Phi) \\
& M_{ccBbAA}(i-1)(1-\Phi)(1-\Phi)F_{CcBbAa}(i-1)+0.25(1-\Phi)M_{ccBbAA}(i-1)(1-\Phi)F_{CcBBAA}(i-1)+ \\
& 0.25\Phi M_{ccBbAA}(i-1)F_{CcbbAa}(i-1)+0.5\Phi M_{ccBbAA}(i-1)F_{CcbbAA}(i-1)+0.125\Phi M_{ccBbAA}(i-1)(1-\Phi)(1-\Phi) \\
& F_{CcBbAa}(i-1)+0.25\Phi M_{ccBbAA}(i-1)(1-\Phi)\Phi F_{CcBbAa}(i-1)+0.25\Phi M_{ccBbAA}(i-1)(1-\Phi)F_{CcBbAA}(i-1) \\
& +0.5\Phi M_{ccBbAA}(i-1)F_{CcbbAa}(i-1)+\Phi M_{ccBbAA}(i-1)F_{CcbbAA}(i-1)+0.25\Phi M_{ccBbAA}(i-1)(1-\Phi) \\
& (1-\Phi)F_{CcBbAa}(i-1)+0.5\Phi M_{ccBbAA}(i-1)(1-\Phi)F_{CcBbAA}(i-1)+0.25M_{ccBbAA}(i-1)F_{CcbbAa}(i-1)+ \\
& 0.5M_{ccBbAA}(i-1)F_{CcbbAA}(i-1)+0.125M_{ccBbAA}(i-1)(1-\Phi)(1-\Phi)F_{CcBbAa}(i-1)+0.25M_{ccBbAA}(i-1) \\
& (1-\Phi)\Phi F_{CcBbAa}(i-1)+0.25M_{ccBbAA}(i-1)(1-\Phi)F_{CcBbAA}(i-1)+0.5M_{ccBbAA}(i-1)F_{CcbbAa}(i-1) \\
& +M_{ccBbAA}(i-1)F_{CcbbAA}(i-1)+0.25M_{ccBbAA}(i-1)(1-\Phi)(1-\Phi)F_{CcBbAa}(i-1)+0.5M_{ccBbAA}(i-1) \\
& (1-\Phi)F_{CcBBAA}(i-1)+0.0625M_{CcbbAa}(i-1)(1-\Phi)F_{ccBbAa}(i-1)+0.125M_{CcbbAa}(i-1)\Phi F_{ccBbAa}(i-1) \\
& +0.125M_{CcbbAa}(i-1)F_{ccBbAA}(i-1)+0.125M_{CcbbAa}(i-1)(1-\Phi)F_{ccBbAA}(i-1)+0.25M_{CcbbAa}(i-1) \\
& \Phi F_{ccBbAa}(i-1)+0.25M_{CcbbAa}(i-1)F_{ccBbAA}(i-1)+0.0625M_{CcbbAa}(i-1)(1-\Phi)(1-\Phi)F_{CcBbAa}(i-1) \\
& +0.125M_{CcbbAa}(i-1)\Phi(1-\Phi)F_{CcBbAa}(i-1)+0.125M_{CcbbAa}(i-1)(1-\Phi)\Phi F_{CcBbAa}(i-1)+0.25M_{CcbbAa}(i-1) \\
& \Phi\Phi F_{CcBbAa}(i-1)+0.125M_{CcbbAa}(i-1)(1-\Phi)F_{CcBbAA}(i-1)+0.25M_{CcbbAa}(i-1)\Phi F_{CcBbAA}(i-1) \\
& +0.125M_{CcbbAa}(i-1)(1-\Phi)F_{CcBBAA}(i-1)+0.25M_{CcbbAa}(i-1)\Phi F_{CcBBAA}(i-1)+0.25M_{CcbbAa}(i-1) \\
& F_{CcBBAA}(i-1)+0.0625M_{CcbbAa}(i-1)(1-\Phi)(1-\Phi)F_{CcBbAa}(i-1)+0.125M_{CcbbAa}(i-1)\Phi(1-\Phi) \\
& F_{CcBbAa}(i-1)+0.125M_{CcbbAa}(i-1)(1-\Phi)\Phi F_{CcBbAa}(i-1)+0.25M_{CcbbAa}(i-1)\Phi\Phi F_{CcBbAa}(i-1) \\
& +0.125M_{CcbbAa}(i-1)(1-\Phi)F_{CcBBAA}(i-1)+0.25M_{CcbbAa}(i-1)\Phi F_{CcBBAA}(i-1)+0.125M_{CcbbAa}(i-1) \\
& \Phi F_{CcBBAA}(i-1)+0.5M_{CcbbAa}(i-1)F_{CcBBAA}(i-1)+0.125M_{CcbbAa}(i-1)(1-\Phi)(1-\Phi)F_{CcBbAa}(i-1) \\
& +0.25M_{CcbbAa}(i-1)\Phi(1-\Phi)F_{CcBbAa}(i-1)+0.5M_{CcbbAa}(i-1)\Phi F_{CcBbAa}(i-1)+0.25M_{CcbbAa}(i-1) \\
& (1-\Phi)F_{CcBBAA}(i-1)+0.5M_{CcbbAa}(i-1)(1-\Phi)F_{CcbbAa}(i-1)+0.5M_{CcbbAa}(i-1)\Phi F_{CcbbAA}(i-1) \\
& +0.25M_{CcbbAa}(i-1)\Phi F_{CcbbAA}(i-1)+0.5M_{CcbbAa}(i-1)\Phi F_{CcBBAA}(i-1)+0.5M_{CcbbAa}(i-1)F_{CcBBAA}(i-1) \\
& +0.125M_{CcbbAa}(i-1)(1-\Phi)(1-\Phi)F_{CcBbAa}(i-1)+0.25M_{CcbbAa}(i-1)\Phi(1-\Phi)F_{CcBbAa}(i-1)+ \\
& 0.25M_{CcbbAa}(i-1)(1-\Phi)\Phi F_{CcBbAa}(i-1)+0.5M_{CcbbAa}(i-1)\Phi\Phi F_{CcBbAa}(i-1)+0.25M_{CcbbAa}(i-1) \\
& (1-\Phi)F_{CcBBAA}(i-1)+0.5M_{CcbbAa}(i-1)\Phi F_{CcBBAA}(i-1)+0.25M_{CcbbAa}(i-1)(1-\Phi)F_{CcBBAA}(i-1) \\
& +0.5M_{CcbbAa}(i-1)\Phi F_{CcBBAA}(i-1)+0.5M_{CcbbAa}(i-1)F_{CcBBAA}(i-1)+0.0625(1-\Phi)(1-\Phi) \\
& M_{CcBbAa}(i-1)F_{ccbbAa}(i-1)+0.125(1-\Phi)(1-\Phi)M_{CcBbAa}(i-1)F_{ccbbAA}(i-1)+0.0625(1-\Phi)(1-\Phi) \\
& M_{CcBbAa}(i-1)(1-\Phi)F_{ccBbAa}(i-1)+0.125(1-\Phi)(1-\Phi)M_{CcBbAa}(i-1)\Phi F_{ccBbAa}(i-1)+0.125(1-\Phi) \\
& (1-\Phi)M_{CcBbAa}(i-1)F_{ccBbAA}(i-1)+0.0625(1-\Phi)(1-\Phi)M_{CcBbAa}(i-1)(1-\Phi)F_{ccBbAA}(i-1)+ \\
& 0.125(1-\Phi)(1-\Phi)M_{CcBbAa}(i-1)\Phi F_{ccBbAA}(i-1)+0.125(1-\Phi)(1-\Phi)M_{CcBbAa}(i-1)F_{ccBbAA}(i-1) \\
& +0.0625(1-\Phi)(1-\Phi)M_{CcBbAa}(i-1)F_{CcbbAa}(i-1)+0.125(1-\Phi)(1-\Phi)M_{CcBbAa}(i-1)F_{CcbbAA}(i-1) \\
& +0.0625(1-\Phi)(1-\Phi)M_{CcBbAa}(i-1)(1-\Phi)(1-\Phi)F_{CcBbAa}(i-1)+0.0625(1-\Phi)(1-\Phi)M_{CcBbAa}(i-1) \\
& \Phi(1-\Phi)F_{CcBbAa}(i-1)+0.125(1-\Phi)(1-\Phi)M_{CcBbAa}(i-1)(1-\Phi)\Phi F_{CcBbAa}(i-1)+0.125(1-\Phi)(1-\Phi) \\
& M_{CcBbAa}(i-1)\Phi\Phi F_{CcBbAa}(i-1)+0.125(1-\Phi)(1-\Phi)M_{CcBbAa}(i-1)(1-\Phi)F_{CcBBAA}(i-1)+0.125(1-\Phi) \\
& (1-\Phi)M_{CcBbAa}(i-1)\Phi F_{CcBBAA}(i-1)+0.0625(1-\Phi)(1-\Phi)M_{CcBbAa}(i-1)(1-\Phi)F_{CcBBAA}(i-1)+ \\
& 0.125(1-\Phi)(1-\Phi)M_{CcBbAa}(i-1)\Phi F_{CcBBAA}(i-1)+0.0625(1-\Phi)(1-\Phi)M_{CcBbAa}(i-1)(1-\Phi) \\
& F_{CcBBAA}(i-1)+0.125(1-\Phi)(1-\Phi)M_{CcBbAa}(i-1)\Phi F_{CcBBAA}(i-1)+0.125(1-\Phi)(1-\Phi)M_{CcBbAa}(i-1) \\
& F_{CcBBAA}(i-1)+0.125\Phi(1-\Phi)M_{CcBbAa}(i-1)F_{ccbbAa}(i-1)+0.25\Phi(1-\Phi)M_{CcBbAa}(i-1)F_{ccbbAA}(i-1) \\
& +0.0625\Phi(1-\Phi)M_{CcBbAa}(i-1)(1-\Phi)F_{ccBbAa}(i-1)+0.125\Phi(1-\Phi)M_{CcBbAa}(i-1)\Phi F_{ccBbAa}(i-1)+
\end{aligned}$$





$$\begin{aligned}
& 1)F_{C_cbbAA}(i-1) + 0.125\Phi M_{CCBbAA}(i-1)(1-\Phi)(1-\Phi)F_{C_cBbAa}(i-1) + 0.25\Phi M_{CCBbAA}(i-1)(1-\Phi) \\
& \Phi F_{C_cBbAa}(i-1) + 0.25\Phi M_{CCBbAA}(i-1)(1-\Phi)F_{C_cBbAa}(i-1) + 0.25(1-\Phi)M_{CCBbAA}(i-1)F_{c_cbbAa}(i-1) \\
& + 0.5(1-\Phi)M_{CCBbAA}(i-1)F_{c_cbbAa}(i-1) + 0.125(1-\Phi)M_{CCBbAA}(i-1)(1-\Phi)F_{C_cBbAa}(i-1) + 0.25(1-\Phi) \\
& M_{CCBbAA}(i-1)\Phi F_{C_cBbAa}(i-1) + 0.25(1-\Phi)M_{CCBbAA}(i-1)F_{C_cBbAa}(i-1) + 0.125(1-\Phi)M_{CCBbAA}(i-1) \\
& F_{C_cbbAa}(i-1) + 0.25(1-\Phi)M_{CCBbAA}(i-1)F_{C_cbbAa}(i-1) + 0.0625(1-\Phi)M_{CCBbAA}(i-1)(1-\Phi)(1-\Phi) \\
& \Phi F_{C_cBbAa}(i-1) + 0.125(1-\Phi)M_{CCBbAA}(i-1)(1-\Phi)\Phi F_{C_cBbAa}(i-1) + 0.125(1-\Phi)M_{CCBbAA}(i-1) \\
& (1-\Phi)F_{C_cBbAa}(i-1) + 0.5\Phi M_{CCBbAA}(i-1)F_{c_cbbAa}(i-1) + \Phi M_{CCBbAA}(i-1)F_{c_cbbAa}(i-1) + \\
& 0.25\Phi M_{CCBbAA}(i-1)(1-\Phi)F_{C_cBbAa}(i-1) + 0.5\Phi M_{CCBbAA}(i-1)\Phi F_{C_cBbAa}(i-1) + 0.5\Phi M_{CCBbAA}(i-1) \\
& F_{c_cbbAa}(i-1) + 0.25\Phi M_{CCBbAA}(i-1)F_{C_cbbAa}(i-1) + 0.5\Phi M_{CCBbAA}(i-1)F_{C_cbbAa}(i-1) + 0.125\Phi M_{CCBbAA}(i-1) \\
& (1-\Phi)(1-\Phi)F_{C_cBbAa}(i-1) + 0.25\Phi M_{CCBbAA}(i-1)(1-\Phi)\Phi F_{C_cBbAa}(i-1) + 0.25\Phi M_{CCBbAA}(i-1)(1-\Phi) \\
& F_{C_cBbAa}(i-1) + 0.5M_{CCBbAA}(i-1)F_{c_cbbAa}(i-1) + M_{CCBbAA}(i-1)F_{c_cbbAa}(i-1) + 0.25M_{CCBbAA}(i-1) \\
& (1-\Phi)F_{C_cBbAa}(i-1) + 0.5M_{CCBbAA}(i-1)\Phi F_{C_cBbAa}(i-1) + 0.5M_{CCBbAA}(i-1)F_{C_cBbAa}(i-1) + \\
& 0.25M_{CCBbAA}(i-1)F_{C_cbbAa}(i-1) + 0.5M_{CCBbAA}(i-1)F_{C_cbbAa}(i-1) + 0.125M_{CCBbAA}(i-1)(1-\Phi)(1-\Phi) \\
& \Phi F_{C_cBbAa}(i-1) + 0.25M_{CCBbAA}(i-1)(1-\Phi)\Phi F_{C_cBbAa}(i-1) + 0.25M_{CCBbAA}(i-1)(1-\Phi)F_{C_cBbAa}(i-1)],
\end{aligned}$$

$$\begin{aligned}
M_{C_cBBaa}^e &= \left( \frac{\Omega_{C_cBBaa}}{2} \right) [0.125M_{ccBbaa}(i-1)(1-\Phi)F_{C_cBbaa}(i-1) + 0.25M_{ccBbaa}(i-1)\Phi F_{C_cBbaa}(i-1) \\
& + 0.0625M_{ccBbaa}(i-1)(1-\Phi)(1-\Phi)F_{C_cBbaa}(i-1) + 0.125M_{ccBbaa}(i-1)\Phi(1-\Phi)F_{C_cBbaa}(i-1) + \\
& 0.25M_{ccBbaa}(i-1)F_{C_cBbaa}(i-1) + 0.125M_{ccBbaa}(i-1)(1-\Phi)F_{C_cBbaa}(i-1) + 0.25M_{ccBbaa}(i-1)(1-\Phi) \\
& F_{C_cBbaa}(i-1) + 0.5M_{ccBbaa}(i-1)\Phi F_{C_cBbaa}(i-1) + 0.125M_{ccBbaa}(i-1)(1-\Phi)(1-\Phi)F_{C_cBbaa}(i-1) + \\
& 0.25M_{ccBbaa}(i-1)\Phi(1-\Phi)F_{C_cBbaa}(i-1) + 0.25M_{ccBbaa}(i-1)(1-\Phi)\Phi F_{C_cBbaa}(i-1) + 0.5M_{ccBbaa}(i-1) \\
& F_{C_cBBaa}(i-1) + 0.25M_{ccBbaa}(i-1)(1-\Phi)F_{C_cBBaa}(i-1) + 0.0625(1-\Phi)M_{ccBbaa}(i-1)(1-\Phi)F_{C_cBbaa}(i-1) \\
& + 0.125(1-\Phi)M_{ccBbaa}(i-1)\Phi F_{C_cBbaa}(i-1) + 0.03125(1-\Phi)M_{ccBbaa}(i-1)(1-\Phi)(1-\Phi)F_{C_cBbaa}(i-1) \\
& + 0.0625(1-\Phi)M_{ccBbaa}(i-1)\Phi(1-\Phi)F_{C_cBbaa}(i-1) + 0.125(1-\Phi)M_{ccBbaa}(i-1)F_{C_cBBaa}(i-1) + \\
& 0.0625(1-\Phi)M_{ccBbaa}(i-1)(1-\Phi)F_{C_cBBaa}(i-1) + 0.125(1-\Phi)M_{ccBbaa}(i-1)(1-\Phi)F_{C_cBbaa}(i-1) + \\
& 0.25(1-\Phi)M_{ccBbaa}(i-1)\Phi F_{C_cBbaa}(i-1) + 0.0625(1-\Phi)M_{ccBbaa}(i-1)(1-\Phi)(1-\Phi)F_{C_cBbaa}(i-1) + \\
& 0.125(1-\Phi)M_{ccBbaa}(i-1)\Phi(1-\Phi)F_{C_cBbaa}(i-1) + 0.125(1-\Phi)M_{ccBbaa}(i-1)(1-\Phi)\Phi F_{C_cBbaa}(i-1) \\
& + 0.25(1-\Phi)M_{ccBbaa}(i-1)F_{C_cBBaa}(i-1) + 0.125(1-\Phi)M_{ccBbaa}(i-1)(1-\Phi)F_{C_cBBaa}(i-1) + \\
& 0.25M_{ccBBaa}(i-1)(1-\Phi)F_{C_cBbaa}(i-1) + 0.5M_{ccBBaa}(i-1)\Phi F_{C_cBbaa}(i-1) + 0.125M_{ccBBaa}(i-1)(1-\Phi) \\
& (1-\Phi)F_{C_cBbaa}(i-1) + 0.25M_{ccBBaa}(i-1)\Phi(1-\Phi)F_{C_cBbaa}(i-1) + 0.5M_{ccBBaa}(i-1)F_{C_cBBaa}(i-1) \\
& + 0.25M_{ccBBaa}(i-1)(1-\Phi)F_{C_cBBaa}(i-1) + 0.5M_{ccBBaa}(i-1)(1-\Phi)F_{C_cBbaa}(i-1) + M_{ccBBaa}(i-1) \\
& \Phi F_{C_cBbaa}(i-1) + 0.25M_{ccBBaa}(i-1)(1-\Phi)(1-\Phi)F_{C_cBbaa}(i-1) + 0.5M_{ccBBaa}(i-1)\Phi(1-\Phi)F_{C_cBbaa}(i-1) \\
& + 0.5M_{ccBBaa}(i-1)(1-\Phi)\Phi F_{C_cBbaa}(i-1) + M_{ccBBaa}(i-1)F_{C_cBBaa}(i-1) + 0.5M_{ccBBaa}(i-1) \\
& (1-\Phi)F_{C_cBBaa}(i-1) + 0.125(1-\Phi)M_{ccBBaa}(i-1)(1-\Phi)F_{C_cBbaa}(i-1) + 0.25(1-\Phi)M_{ccBBaa}(i-1) \\
& \Phi F_{C_cBbaa}(i-1) + 0.0625(1-\Phi)M_{ccBBaa}(i-1)(1-\Phi)(1-\Phi)F_{C_cBbaa}(i-1) + 0.125(1-\Phi)M_{ccBBaa}(i-1) \\
& \Phi(1-\Phi)F_{C_cBbaa}(i-1) + 0.25(1-\Phi)M_{ccBBaa}(i-1)F_{C_cBBaa}(i-1) + 0.125(1-\Phi)M_{ccBBaa}(i-1) \\
& (1-\Phi)F_{C_cBBaa}(i-1) + 0.25(1-\Phi)M_{ccBBaa}(i-1)(1-\Phi)F_{C_cBbaa}(i-1) + 0.5(1-\Phi)M_{ccBBaa}(i-1) \\
& \Phi F_{C_cBbaa}(i-1) + 0.125(1-\Phi)M_{ccBBaa}(i-1)(1-\Phi)(1-\Phi)F_{C_cBbaa}(i-1) + 0.25(1-\Phi)M_{ccBBaa}(i-1) \\
& \Phi(1-\Phi)F_{C_cBbaa}(i-1) + 0.25(1-\Phi)M_{ccBBaa}(i-1)(1-\Phi)\Phi F_{C_cBbaa}(i-1) + 0.5(1-\Phi)M_{ccBBaa}(i-1) \\
& F_{C_cBBaa}(i-1) + 0.25(1-\Phi)M_{ccBBaa}(i-1)(1-\Phi)F_{C_cBBaa}(i-1) + 0.125(1-\Phi)M_{C_cBbaa}(i-1)F_{C_cBbaa}(i-1) \\
& + 0.0625(1-\Phi)M_{C_cBbaa}(i-1)(1-\Phi)F_{C_cBbaa}(i-1) + 0.25(1-\Phi)M_{C_cBbaa}(i-1)F_{C_cBBaa}(i-1) + \\
& 0.125(1-\Phi)M_{C_cBbaa}(i-1)(1-\Phi)F_{C_cBbaa}(i-1) + 0.125(1-\Phi)M_{C_cBbaa}(i-1)(1-\Phi)F_{C_cBbaa}(i-1) + \\
& 0.25(1-\Phi)M_{C_cBbaa}(i-1)\Phi F_{C_cBbaa}(i-1) + 0.0625(1-\Phi)M_{C_cBbaa}(i-1)(1-\Phi)(1-\Phi)F_{C_cBbaa}(i-1) \\
& + 0.125(1-\Phi)M_{C_cBbaa}(i-1)\Phi(1-\Phi)F_{C_cBbaa}(i-1) + 0.125(1-\Phi)M_{C_cBbaa}(i-1)(1-\Phi)\Phi F_{C_cBbaa}(i-1) \\
& + 0.25(1-\Phi)M_{C_cBbaa}(i-1)F_{C_cBBaa}(i-1) + 0.125(1-\Phi)M_{C_cBbaa}(i-1)(1-\Phi)F_{C_cBBaa}(i-1) + \\
& 0.25\Phi M_{C_cBbaa}(i-1)F_{C_cBbaa}(i-1) + 0.125\Phi M_{C_cBbaa}(i-1)(1-\Phi)F_{C_cBbaa}(i-1) + 0.5\Phi M_{C_cBbaa}(i-1) \\
& F_{C_cBBaa}(i-1) + 0.25\Phi M_{C_cBbaa}(i-1)\Phi F_{C_cBbaa}(i-1) + 0.125\Phi M_{C_cBbaa}(i-1)(1-\Phi)(1-\Phi)F_{C_cBbaa}(i-1) + 0.25\Phi M_{C_cBbaa}(i-1) \\
& \Phi(1-\Phi)F_{C_cBbaa}(i-1) + 0.5\Phi M_{C_cBbaa}(i-1)F_{C_cBBaa}(i-1) + 0.25\Phi M_{C_cBbaa}(i-1)(1-\Phi)F_{C_cBBaa}(i-1) \\
& + 0.25\Phi M_{C_cBbaa}(i-1)(1-\Phi)F_{C_cBBaa}(i-1) + 0.5\Phi M_{C_cBbaa}(i-1)\Phi F_{C_cBbaa}(i-1) + 0.125\Phi M_{C_cBbaa}(i-1) \\
& (1-\Phi)(1-\Phi)F_{C_cBbaa}(i-1) + 0.25\Phi M_{C_cBbaa}(i-1)\Phi(1-\Phi)F_{C_cBbaa}(i-1) + 0.25\Phi M_{C_cBbaa}(i-1)(1-\Phi) \\
& \Phi F_{C_cBbaa}(i-1) + 0.5\Phi M_{C_cBbaa}(i-1)F_{C_cBBaa}(i-1) + 0.25\Phi M_{C_cBbaa}(i-1)(1-\Phi)F_{C_cBBaa}(i-1) \\
& + 0.0625(1-\Phi)(1-\Phi)M_{C_cBbaa}(i-1)F_{C_cBbaa}(i-1) + 0.03125(1-\Phi)(1-\Phi)M_{C_cBbaa}(i-1)(1-\Phi) \\
& F_{C_cBbaa}(i-1) + 0.125(1-\Phi)(1-\Phi)M_{C_cBbaa}(i-1)F_{C_cBBaa}(i-1) + 0.0625(1-\Phi)(1-\Phi)M_{C_cBbaa}(i-1) \\
& (1-\Phi)F_{C_cBbaa}(i-1) + 0.125(1-\Phi)(1-\Phi)M_{C_cBbaa}(i-1)(1-\Phi)F_{C_cBbaa}(i-1) + 0.125(1-\Phi)(1-\Phi) \\
& (1-\Phi)F_{C_cBbaa}(i-1) + 0.0625(1-\Phi)(1-\Phi)M_{C_cBbaa}(i-1)(1-\Phi)F_{C_cBbaa}(i-1) + 0.125(1-\Phi)(1-\Phi) \\
& (1-\Phi)F_{C_cBbaa}(i-1)],
\end{aligned}$$



$$0.0625(1-\Phi)M_{CCBBAA}(i-1)(1-\Phi)(1-\Phi)F_{CcBbAa}(i-1)+0.125(1-\Phi)M_{CCBBAA}(i-1)\Phi(1-\Phi)F_{CcBbAa}(i-1)+0.25(1-\Phi)M_{CCBBAA}(i-1)F_{CcBbAa}(i-1)+0.125(1-\Phi)M_{CCBBAA}(i-1)(1-\Phi)F_{CcBbAa}(i-1)],$$

$$\begin{aligned} M_{CCBBAA}^e &= \left(\frac{\bar{\Omega}_{CCBBAA}}{2}\right) [0.0625M_{ccBbaa}(i-1)(1-\Phi)(1-\Phi)F_{CcBbAa}(i-1)+0.125M_{ccBbaa}(i-1)\Phi(1-\Phi)F_{CcBbAa}(i-1) \\ &+ 0.125M_{ccBbaa}(i-1)(1-\Phi)\Phi F_{CcBbAa}(i-1)+0.25M_{ccBbaa}(i-1)\Phi\Phi F_{CcBbAa}(i-1) \\ &+ 0.125M_{ccBbaa}(i-1)(1-\Phi)F_{CcBbAA}(i-1)+0.25M_{ccBbaa}(i-1)\Phi F_{CcBbAA}(i-1)+0.125M_{ccBbaa}(i-1) \\ &(1-\Phi)F_{CcBbAA}(i-1)+0.25M_{ccBbaa}(i-1)\Phi F_{CcBbAA}(i-1)+0.25M_{ccBbaa}(i-1)F_{CcBbAA}(i-1)+ \\ &0.125M_{ccBbaa}(i-1)(1-\Phi)(1-\Phi)F_{CcBbAA}(i-1)+0.25M_{ccBbaa}(i-1)\Phi(1-\Phi)F_{CcBbAA}(i-1)+0.25M_{ccBbaa}(i-1) \\ &(1-\Phi)\Phi F_{CcBbAA}(i-1)+0.5M_{ccBbaa}(i-1)\Phi\Phi F_{CcBbAA}(i-1)+0.25M_{ccBbaa}(i-1)(1-\Phi)F_{CcBbAA}(i-1) \\ &+ 0.5M_{ccBbaa}(i-1)\Phi F_{CcBbAA}(i-1)+0.25M_{ccBbaa}(i-1)(1-\Phi)F_{CcBbAA}(i-1)+0.5M_{ccBbaa}(i-1) \\ &\Phi F_{CcBbAA}(i-1)+0.5M_{ccBbaa}(i-1)F_{CcBbAA}(i-1)+0.0625(1-\Phi)M_{ccBbAa}(i-1)(1-\Phi)F_{CcBbaa}(i-1) \\ &+ 0.125(1-\Phi)M_{ccBbAa}(i-1)\Phi F_{CcBbaa}(i-1)+0.0625(1-\Phi)M_{ccBbAa}(i-1)(1-\Phi)(1-\Phi)F_{CcBbAa}(i-1) \\ &+ 0.125(1-\Phi)M_{ccBbAa}(i-1)\Phi(1-\Phi)F_{CcBbAa}(i-1)+0.0625(1-\Phi)M_{ccBbAa}(i-1)(1-\Phi)\Phi F_{CcBbAa}(i-1) \\ &+ 0.125(1-\Phi)M_{ccBbAa}(i-1)\Phi\Phi F_{CcBbAa}(i-1)+0.0625(1-\Phi)M_{ccBbAa}(i-1)(1-\Phi)F_{CcBbAA}(i-1) \\ &+ 0.125(1-\Phi)M_{ccBbAa}(i-1)\Phi F_{CcBbAA}(i-1)+0.125(1-\Phi)M_{ccBbAa}(i-1)F_{CcBbAa}(i-1)+0.125(1-\Phi) \\ &M_{ccBbAa}(i-1)(1-\Phi)F_{CcBbAA}(i-1)+0.125(1-\Phi)M_{ccBbAa}(i-1)\Phi F_{CcBbAA}(i-1)+0.125(1-\Phi) \\ &M_{ccBbAa}(i-1)F_{CcBbAA}(i-1)+0.125(1-\Phi)M_{ccBbAa}(i-1)(1-\Phi)F_{CcBbaa}(i-1)+0.25(1-\Phi)M_{ccBbAa}(i-1) \\ &\Phi F_{CcBbaa}(i-1)+0.125(1-\Phi)M_{ccBbAa}(i-1)(1-\Phi)(1-\Phi)F_{CcBbAa}(i-1)+0.25(1-\Phi)M_{ccBbAa}(i-1) \\ &\Phi(1-\Phi)F_{CcBbAa}(i-1)+0.25(1-\Phi)M_{ccBbAa}(i-1)(1-\Phi)\Phi F_{CcBbAa}(i-1)+0.25(1-\Phi)M_{ccBbAa}(i-1) \\ &\Phi\Phi F_{CcBbAa}(i-1)+0.125(1-\Phi)M_{ccBbAa}(i-1)(1-\Phi)F_{CcBbAA}(i-1)+0.25(1-\Phi)M_{ccBbAa}(i-1) \\ &\Phi F_{CcBbAA}(i-1)+0.25(1-\Phi)M_{ccBbAa}(i-1)F_{CcBbAA}(i-1)+0.125\Phi M_{ccBbAa}(i-1)(1-\Phi)(1-\Phi) \\ &F_{CcBbAa}(i-1)+0.125\Phi M_{ccBbAa}(i-1)\Phi(1-\Phi)F_{CcBbAa}(i-1)+0.25\Phi M_{ccBbAa}(i-1)F_{CcBbAa}(i-1) \\ &+ 0.125\Phi M_{ccBbAa}(i-1)(1-\Phi)F_{CcBbAA}(i-1)+0.25\Phi M_{ccBbAa}(i-1)(1-\Phi)F_{CcBbaa}(i-1)+0.5\Phi M_{ccBbAa}(i-1) \\ &\Phi F_{CcBbaa}(i-1)+0.125\Phi M_{ccBbAa}(i-1)(1-\Phi)(1-\Phi)F_{CcBbAa}(i-1)+0.25\Phi M_{ccBbAa}(i-1)\Phi(1-\Phi) \\ &F_{CcBbAa}(i-1)+0.25\Phi M_{ccBbAa}(i-1)(1-\Phi)\Phi F_{CcBbAa}(i-1)+0.5\Phi M_{ccBbAa}(i-1)F_{CcBbAa}(i-1) \\ &+ 0.25\Phi M_{ccBbAa}(i-1)(1-\Phi)F_{CcBbAA}(i-1)+0.125M_{ccBbAA}(i-1)(1-\Phi)F_{CcBbaa}(i-1)+0.25M_{ccBbAA}(i-1) \\ &\Phi F_{CcBbaa}(i-1)+0.0625M_{ccBbAA}(i-1)(1-\Phi)(1-\Phi)F_{CcBbAa}(i-1)+0.125M_{ccBbAA}(i-1)\Phi(1-\Phi) \\ &F_{CcBbAa}(i-1)+0.25M_{ccBbAA}(i-1)F_{CcBbAA}(i-1)+0.125M_{ccBbAA}(i-1)(1-\Phi)F_{CcBbAA}(i-1) \\ &+ 0.25M_{ccBbAA}(i-1)(1-\Phi)F_{CcBbaa}(i-1)+0.5M_{ccBbAA}(i-1)\Phi F_{CcBbaa}(i-1)+0.125M_{ccBbAA}(i-1) \\ &(1-\Phi)(1-\Phi)F_{CcBbAa}(i-1)+0.25M_{ccBbAA}(i-1)\Phi(1-\Phi)F_{CcBbAa}(i-1)+0.25M_{ccBbAA}(i-1)(1-\Phi) \\ &\Phi F_{CcBbAa}(i-1)+0.5M_{ccBbAA}(i-1)F_{CcBbAa}(i-1)+0.25M_{ccBbAA}(i-1)(1-\Phi)F_{CcBbAA}(i-1) \\ &+ 0.125M_{ccBbAA}(i-1)(1-\Phi)(1-\Phi)F_{CcBbAa}(i-1)+0.25M_{ccBbAA}(i-1)\Phi(1-\Phi)F_{CcBbAa}(i-1) \\ &+ 0.25M_{ccBbAA}(i-1)(1-\Phi)\Phi F_{CcBbAa}(i-1)+0.25M_{ccBbAA}(i-1)F_{CcBbAa}(i-1)+0.25(1-\Phi) \\ &M_{ccBbAA}(i-1)\Phi F_{CcBbAA}(i-1)+0.25(1-\Phi)M_{ccBbAA}(i-1)F_{CcBbAA}(i-1)+0.25(1-\Phi)M_{ccBbAA}(i-1) \\ &(1-\Phi)F_{CcBbaa}(i-1)+0.5(1-\Phi)M_{ccBbAA}(i-1)\Phi F_{CcBbaa}(i-1)+0.25(1-\Phi)M_{ccBbAA}(i-1)(1-\Phi) \\ &(1-\Phi)F_{CcBbAa}(i-1)+0.5(1-\Phi)M_{ccBbAA}(i-1)\Phi(1-\Phi)F_{CcBbAa}(i-1)+0.5(1-\Phi)M_{ccBbAA}(i-1) \\ &(1-\Phi)\Phi F_{CcBbAa}(i-1)+0.5(1-\Phi)M_{ccBbAA}(i-1)\Phi\Phi F_{CcBbAa}(i-1)+0.25(1-\Phi)M_{ccBbAA}(i-1)(1-\Phi) \\ &F_{CcBbAA}(i-1)+0.5(1-\Phi)M_{ccBbAA}(i-1)\Phi F_{CcBbAA}(i-1)+0.5(1-\Phi)M_{ccBbAA}(i-1)F_{CcBbAA}(i-1) \\ &+ 0.5(1-\Phi)M_{ccBbAA}(i-1)F_{CcBbAA}(i-1)+0.25\Phi M_{ccBbAA}(i-1)(1-\Phi)F_{CcBbaa}(i-1)+0.5\Phi M_{ccBbAA}(i-1) \\ &\Phi F_{CcBbaa}(i-1)+0.125\Phi M_{ccBbAA}(i-1)(1-\Phi)(1-\Phi)F_{CcBbAa}(i-1)+0.25\Phi M_{ccBbAA}(i-1)\Phi(1-\Phi) \\ &F_{CcBbAa}(i-1)+0.5\Phi M_{ccBbAA}(i-1)F_{CcBbAa}(i-1)+0.25\Phi M_{ccBbAA}(i-1)(1-\Phi)F_{CcBbAA}(i-1) \\ &+ 0.5\Phi M_{ccBbAA}(i-1)(1-\Phi)F_{CcBbaa}(i-1)+\Phi M_{ccBbAA}(i-1)\Phi F_{CcBbaa}(i-1)+0.25\Phi M_{ccBbAA}(i-1) \\ &(1-\Phi)(1-\Phi)F_{CcBbAa}(i-1)+0.5\Phi M_{ccBbAA}(i-1)\Phi(1-\Phi)F_{CcBbAa}(i-1)+0.5\Phi M_{ccBbAA}(i-1)(1-\Phi) \\ &\Phi F_{CcBbAa}(i-1)+\Phi M_{ccBbAA}(i-1)F_{CcBbAa}(i-1)+0.5\Phi M_{ccBbAA}(i-1)(1-\Phi)F_{CcBbAA}(i-1)+ \end{aligned}$$















$$\begin{aligned}
& 1) + 0.5\Phi M_{CcBBAA}(i-1)\Phi F_{CCBBAA}(i-1) + 0.5\Phi M_{CcBBAA}(i-1)F_{CCBBAA}(i-1) + 0.125M_{CcBBAA}(i-1) \\
& (1-\Phi)F_{ccBbAa}(i-1) + 0.25M_{CcBBAA}(i-1)\Phi F_{ccBbAa}(i-1) + 0.25M_{CcBBAA}(i-1)F_{ccBbAa}(i-1) + \\
& 0.25M_{CcBBAA}(i-1)(1-\Phi)F_{CcBBAA}(i-1) + 0.5M_{CcBBAA}(i-1)\Phi F_{CcBBAA}(i-1) + 0.5M_{CcBBAA}(i-1) \\
& F_{CcBBAA}(i-1) + 0.125M_{CcBBAA}(i-1)(1-\Phi)(1-\Phi)F_{CcBbAa}(i-1) + 0.25M_{CcBBAA}(i-1)\Phi(1-\Phi) \\
& F_{CcBbAa}(i-1) + 0.25M_{CcBBAA}(i-1)(1-\Phi)\Phi F_{CcBbAa}(i-1) + 0.5M_{CcBBAA}(i-1)\Phi\Phi F_{CcBbAa}(i-1) + \\
& 0.25M_{CcBBAA}(i-1)(1-\Phi)F_{CcBbAA}(i-1) + 0.5M_{CcBBAA}(i-1)\Phi F_{CcBbAA}(i-1) + 0.25M_{CcBBAA}(i-1) \\
& (1-\Phi)F_{CcBbAA}(i-1) + 0.125M_{CcBBAA}(i-1)(1-\Phi)(1-\Phi)F_{CCBbAa}(i-1) + 0.25M_{CcBBAA}(i-1)\Phi(1-\Phi)F_{CCBbAa}(i-1) + \\
& 0.25M_{CcBBAA}(i-1)(1-\Phi)\Phi F_{CCBbAa}(i-1) + 0.5M_{CcBBAA}(i-1)\Phi\Phi F_{CCBbAa}(i-1) + 0.25M_{CcBBAA}(i-1) \\
& (1-\Phi)F_{CCBbAA}(i-1) + 0.5M_{CcBBAA}(i-1)\Phi F_{CCBbAA}(i-1) + 0.25M_{CcBBAA}(i-1)(1-\Phi)F_{CCBbAA}(i-1) + \\
& 0.5M_{CcBBAA}(i-1)\Phi F_{CCBbAA}(i-1) + 0.5M_{CcBBAA}(i-1)F_{CCBbAA}(i-1) + 0.0625(1-\Phi)(1-\Phi) \\
& M_{CCBbAa}(i-1)(1-\Phi)F_{ccBbAa}(i-1) + 0.125(1-\Phi)(1-\Phi)M_{CCBbAa}(i-1)\Phi F_{ccBbAa}(i-1) + 0.125(1-\Phi) \\
& (1-\Phi)M_{CCBbAa}(i-1)F_{ccBbAA}(i-1) + 0.125(1-\Phi)(1-\Phi)M_{CCBbAa}(i-1)(1-\Phi)F_{ccBbAA}(i-1) + \\
& 0.25(1-\Phi)(1-\Phi)M_{CCBbAa}(i-1)\Phi F_{ccBbAA}(i-1) + 0.25(1-\Phi)(1-\Phi)M_{CCBbAa}(i-1)F_{ccBbAA}(i-1) + \\
& 0.03125(1-\Phi)(1-\Phi)M_{CCBbAa}(i-1)(1-\Phi)(1-\Phi)F_{CcBbAa}(i-1) + 0.0625(1-\Phi)(1-\Phi)M_{CCBbAa}(i-1) \\
& \Phi(1-\Phi)F_{CcBbAa}(i-1) + 0.0625(1-\Phi)(1-\Phi)M_{CCBbAa}(i-1)(1-\Phi)\Phi F_{CcBbAa}(i-1) + 0.125(1-\Phi) \\
& (1-\Phi)M_{CCBbAa}(i-1)\Phi\Phi F_{CcBbAa}(i-1) + 0.0625(1-\Phi)(1-\Phi)M_{CCBbAa}(i-1)(1-\Phi)F_{CcBbAA}(i-1) + \\
& 0.125(1-\Phi)(1-\Phi)M_{CCBbAa}(i-1)\Phi F_{CcBbAA}(i-1) + 0.0625(1-\Phi)(1-\Phi)M_{CCBbAa}(i-1)(1-\Phi) \\
& F_{CcBbAA}(i-1) + 0.125(1-\Phi)(1-\Phi)M_{CCBbAa}(i-1)\Phi F_{CcBbAA}(i-1) + 0.125(1-\Phi)(1-\Phi)M_{CCBbAa}(i-1) \\
& F_{CcBbAA}(i-1) + 0.125\Phi(1-\Phi)M_{CCBbAa}(i-1)(1-\Phi)F_{ccBbAa}(i-1) + 0.25\Phi(1-\Phi)M_{CCBbAa}(i-1) \\
& \Phi F_{ccBbAa}(i-1) + 0.25\Phi(1-\Phi)M_{CCBbAa}(i-1)F_{ccBbAA}(i-1) + 0.25\Phi(1-\Phi)M_{CCBbAa}(i-1)(1-\Phi) \\
& F_{ccBbAA}(i-1) + 0.5\Phi(1-\Phi)M_{CCBbAa}(i-1)\Phi F_{ccBbAA}(i-1) + 0.5\Phi(1-\Phi)M_{CCBbAa}(i-1)F_{ccBbAA}(i-1) \\
& + 0.0625\Phi(1-\Phi)M_{CCBbAa}(i-1)(1-\Phi)(1-\Phi)F_{CcBbAa}(i-1) + 0.125\Phi(1-\Phi)M_{CCBbAa}(i-1)\Phi(1-\Phi) \\
& F_{CcBbAa}(i-1) + 0.125\Phi(1-\Phi)M_{CCBbAa}(i-1)(1-\Phi)\Phi F_{CcBbAa}(i-1) + 0.25\Phi(1-\Phi)M_{CCBbAa}(i-1) \\
& \Phi\Phi F_{CcBbAa}(i-1) + 0.125\Phi(1-\Phi)M_{CCBbAa}(i-1)(1-\Phi)F_{CcBbAA}(i-1) + 0.25\Phi(1-\Phi)M_{CCBbAa}(i-1) \\
& \Phi F_{CcBbAA}(i-1) + 0.125\Phi(1-\Phi)M_{CCBbAa}(i-1)(1-\Phi)F_{CcBbAA}(i-1) + 0.25\Phi(1-\Phi)M_{CCBbAa}(i-1) \\
& \Phi F_{CcBbAA}(i-1) + 0.25\Phi(1-\Phi)M_{CCBbAa}(i-1)F_{CcBbAA}(i-1) + 0.125(1-\Phi)\Phi M_{CCBbAa}(i-1)(1-\Phi) \\
& F_{ccBbAa}(i-1) + 0.25(1-\Phi)\Phi M_{CCBbAa}(i-1)\Phi F_{ccBbAa}(i-1) + 0.25(1-\Phi)\Phi M_{CCBbAa}(i-1)F_{ccBbAA}(i-1) \\
& + 0.25(1-\Phi)\Phi M_{CCBbAa}(i-1)(1-\Phi)F_{ccBbAA}(i-1) + 0.5(1-\Phi)\Phi M_{CCBbAa}(i-1)\Phi F_{ccBbAA}(i-1) + \\
& 0.5(1-\Phi)\Phi M_{CCBbAa}(i-1)F_{ccBbAA}(i-1) + 0.0625(1-\Phi)\Phi M_{CCBbAa}(i-1)(1-\Phi)(1-\Phi)F_{CcBbAa}(i-1) + \\
& 0.125(1-\Phi)\Phi M_{CCBbAa}(i-1)\Phi(1-\Phi)F_{CcBbAa}(i-1) + 0.125(1-\Phi)\Phi M_{CCBbAa}(i-1)(1-\Phi)\Phi F_{CcBbAa}(i-1) \\
& + 0.25(1-\Phi)\Phi M_{CCBbAa}(i-1)\Phi\Phi F_{CcBbAa}(i-1) + 0.125(1-\Phi)\Phi M_{CCBbAa}(i-1)(1-\Phi)F_{CcBbAA}(i-1) + \\
& 0.25(1-\Phi)\Phi M_{CCBbAa}(i-1)\Phi F_{CcBbAA}(i-1) + 0.125(1-\Phi)\Phi M_{CCBbAa}(i-1)(1-\Phi)F_{CcBbAA}(i-1) + \\
& 0.25(1-\Phi)\Phi M_{CCBbAa}(i-1)F_{CcBbAA}(i-1) + 0.5\Phi\Phi M_{CCBbAa}(i-1)F_{ccBbAA}(i-1) + \Phi\Phi M_{CCBbAa}(i-1) \\
& F_{ccBbAA}(i-1) + 0.125\Phi\Phi M_{CCBbAa}(i-1)(1-\Phi)(1-\Phi)F_{CcBbAa}(i-1) + 0.25\Phi\Phi M_{CCBbAa}(i-1)\Phi(1-\Phi) \\
& F_{CcBbAa}(i-1) + 0.25\Phi\Phi M_{CCBbAa}(i-1)(1-\Phi)\Phi F_{CcBbAa}(i-1) + 0.5\Phi\Phi M_{CCBbAa}(i-1)\Phi F_{CcBbAa}(i-1) \\
& + 0.25\Phi\Phi M_{CCBbAa}(i-1)(1-\Phi)F_{CcBbAA}(i-1) + 0.5\Phi\Phi M_{CCBbAa}(i-1)\Phi F_{CcBbAA}(i-1) + 0.25\Phi\Phi M_{CCBbAa}(i-1) \\
& (1-\Phi)F_{CcBbAA}(i-1) + 0.5\Phi\Phi M_{CCBbAa}(i-1)\Phi F_{CcBbAA}(i-1) + 0.5\Phi\Phi M_{CCBbAa}(i-1)F_{CcBbAA}(i-1) + \\
& 0.125(1-\Phi)M_{CCBbAA}(i-1)F_{ccBbAA}(i-1) + 0.25(1-\Phi)M_{CCBbAA}(i-1)(1-\Phi)F_{ccBbAA}(i-1) + 0.5(1-\Phi)M_{CCBbAA}(i-1) \\
& \Phi F_{ccBbAA}(i-1) + 0.5(1-\Phi)M_{CCBbAA}(i-1)F_{ccBbAA}(i-1) + 0.0625(1-\Phi)M_{CCBbAA}(i-1)(1-\Phi)(1-\Phi) \\
& F_{CcBbAa}(i-1) + 0.125(1-\Phi)M_{CCBbAA}(i-1)\Phi(1-\Phi)F_{CcBbAa}(i-1) + 0.125(1-\Phi)M_{CCBbAA}(i-1) \\
& (1-\Phi)\Phi F_{CcBbAa}(i-1) + 0.25(1-\Phi)M_{CCBbAA}(i-1)\Phi\Phi F_{CcBbAa}(i-1) + 0.125(1-\Phi)M_{CCBbAA}(i-1) \\
& (1-\Phi)F_{CcBbAA}(i-1) + 0.25(1-\Phi)M_{CCBbAA}(i-1)\Phi F_{CcBbAA}(i-1) + 0.125(1-\Phi)M_{CCBbAA}(i-1) \\
& (1-\Phi)F_{CcBbAA}(i-1) + 0.25(1-\Phi)M_{CCBbAA}(i-1)\Phi F_{CcBbAA}(i-1) + 0.25(1-\Phi)M_{CCBbAA}(i-1) \\
& F_{CcBbAA}(i-1) + 0.25\Phi M_{CCBbAA}(i-1)(1-\Phi)F_{ccBbAa}(i-1) + 0.5\Phi M_{CCBbAA}(i-1)\Phi F_{ccBbAa}(i-1) \\
& + 0.5\Phi M_{CCBbAA}(i-1)F_{ccBbAA}(i-1) + \Phi M_{CCBbAA}(i-1)F_{ccBbAA}(i-1) + 0.125\Phi M_{CCBbAA}(i-1)(1-\Phi)(1-\Phi)F_{CcBbAa}(i-1) \\
& + 0.25\Phi M_{CCBbAA}(i-1)\Phi(1-\Phi)F_{CcBbAa}(i-1) + 0.25\Phi M_{CCBbAA}(i-1)(1-\Phi)\Phi F_{CcBbAa}(i-1) + \\
& 0.5\Phi M_{CCBbAA}(i-1)\Phi\Phi F_{CcBbAa}(i-1) + 0.25\Phi M_{CCBbAA}(i-1)(1-\Phi)F_{CcBbAA}(i-1) + 0.5\Phi M_{CCBbAA}(i-1) \\
& \Phi F_{CcBbAA}(i-1) + 0.5\Phi M_{CCBbAA}(i-1)F_{CcBbAA}(i-1) + 0.125(1-\Phi)M_{CCBbAA}(i-1)(1-\Phi)F_{ccBbAa}(i-1) + 0.25(1-\Phi) \\
& M_{CCBbAA}(i-1)\Phi F_{ccBbAa}(i-1) + 0.25(1-\Phi)M_{CCBbAA}(i-1)F_{ccBbAA}(i-1) + 0.25(1-\Phi)M_{CCBbAA}(i-1) \\
& (1-\Phi)F_{ccBbAA}(i-1) + 0.5(1-\Phi)M_{CCBbAA}(i-1)\Phi F_{ccBbAA}(i-1) + 0.5(1-\Phi)M_{CCBbAA}(i-1)F_{ccBbAA}(i-1) \\
& + 0.0625(1-\Phi)M_{CCBbAA}(i-1)(1-\Phi)(1-\Phi)F_{CcBbAa}(i-1) + 0.125(1-\Phi)M_{CCBbAA}(i-1)\Phi(1-\Phi)
\end{aligned}$$

$$\begin{aligned}
& \Phi F_{CcBbAa}(i-1) + 0.125(1-\Phi)M_{CCBBAA}(i-1)(1-\Phi)\Phi F_{CcBbAa}(i-1) + 0.25(1-\Phi)M_{CCBBAA}(i-1) \\
& \Phi F_{CcBbAa}(i-1) + 0.125(1-\Phi)M_{CCBBAA}(i-1)(1-\Phi)F_{CcBbAA}(i-1) + 0.25(1-\Phi)M_{CCBBAA}(i-1) \\
& \Phi F_{CcBbAA}(i-1) + 0.125(1-\Phi)M_{CCBBAA}(i-1)(1-\Phi)F_{CcBBAA}(i-1) + 0.25(1-\Phi)M_{CCBBAA}(i-1) \\
& \Phi F_{CcBBAA}(i-1) + 0.25(1-\Phi)M_{CCBBAA}(i-1)F_{CcBBAA}(i-1) + 0.25\Phi M_{CCBBAA}(i-1)(1-\Phi)F_{CcBbAa}(i-1) \\
& + 0.5\Phi M_{CCBBAA}(i-1)\Phi F_{CcBbAa}(i-1) + 0.5\Phi M_{CCBBAA}(i-1)F_{CcBbAA}(i-1) + 0.5\Phi M_{CCBBAA}(i-1) \\
& (1-\Phi)F_{CcBBAA}(i-1) + \Phi M_{CCBBAA}(i-1)\Phi F_{CcBBAA}(i-1) + \Phi M_{CCBBAA}(i-1)F_{CcBBAA}(i-1) + \\
& 0.125\Phi M_{CCBBAA}(i-1)(1-\Phi)(1-\Phi)F_{CcBbAa}(i-1) + 0.25\Phi M_{CCBBAA}(i-1)\Phi(1-\Phi)F_{CcBbAa}(i-1) + \\
& 0.25\Phi M_{CCBBAA}(i-1)(1-\Phi)\Phi F_{CcBbAa}(i-1) + 0.5\Phi M_{CCBBAA}(i-1)\Phi\Phi F_{CcBbAa}(i-1) + 0.25\Phi M_{CCBBAA}(i-1) \\
& (1-\Phi)F_{CcBbAA}(i-1) + 0.5\Phi M_{CCBBAA}(i-1)\Phi F_{CcBbAA}(i-1) + 0.25\Phi M_{CCBBAA}(i-1)(1-\Phi)F_{CcBbAA}(i-1) \\
& + 0.5\Phi M_{CCBBAA}(i-1)\Phi F_{CcBBAA}(i-1) + 0.5\Phi M_{CCBBAA}(i-1)F_{CcBBAA}(i-1) + 0.25M_{CCBBAA}(i-1) \\
& (1-\Phi)F_{CcBbAa}(i-1) + 0.5M_{CCBBAA}(i-1)\Phi F_{CcBbAa}(i-1) + 0.5M_{CCBBAA}(i-1)F_{CcBbAA}(i-1) + \\
& 0.5M_{CCBBAA}(i-1)(1-\Phi)F_{CcBBAA}(i-1) + M_{CCBBAA}(i-1)\Phi F_{CcBBAA}(i-1) + M_{CCBBAA}(i-1)F_{CcBBAA}(i-1) \\
& + 0.125M_{CCBBAA}(i-1)(1-\Phi)(1-\Phi)F_{CcBbAa}(i-1) + 0.25M_{CCBBAA}(i-1)\Phi(1-\Phi)F_{CcBbAa}(i-1) + \\
& 0.25M_{CCBBAA}(i-1)(1-\Phi)\Phi F_{CcBbAa}(i-1) + 0.5M_{CCBBAA}(i-1)\Phi\Phi F_{CcBbAa}(i-1) + 0.25M_{CCBBAA}(i-1) \\
& (1-\Phi)F_{CcBbAA}(i-1) + 0.5M_{CCBBAA}(i-1)\Phi F_{CcBbAA}(i-1) + 0.25M_{CCBBAA}(i-1)(1-\Phi)F_{CcBbAA}(i-1) \\
& + 0.5M_{CCBBAA}(i-1)\Phi F_{CcBBAA}(i-1) + 0.5M_{CCBBAA}(i-1)F_{CcBBAA}(i-1)],
\end{aligned}$$

$$\begin{aligned}
M_{CCbbAa}^e &= \left( \frac{\bar{\Omega}_{CCbbAa}}{2} \right) [0.25M_{Ccbbaa}(i-1)F_{Ccbbaa}(i-1) + 0.125M_{Ccbbaa}(i-1)F_{CcbbAa}(i-1) + 0.125M_{Ccbbaa}(i-1) \\
& (1-\Phi)F_{CcBbAa}(i-1) + 0.0625M_{Ccbbaa}(i-1)(1-\Phi)(1-\Phi)F_{CcBbAa}(i-1) + 0.5M_{Ccbbaa}(i-1)F_{CCbbaa}(i-1) \\
& + 0.25M_{Ccbbaa}(i-1)F_{CCbbAa}(i-1) + 0.25M_{Ccbbaa}(i-1)(1-\Phi)F_{CCBbaa}(i-1) + 0.125M_{Ccbbaa}(i-1) \\
& (1-\Phi)(1-\Phi)F_{CCBbAa}(i-1) + 0.125M_{Ccbbaa}(i-1)F_{Ccbbaa}(i-1) + 0.0625M_{Ccbbaa}(i-1)F_{CcbbAa}(i-1) \\
& + 0.0625M_{Ccbbaa}(i-1)(1-\Phi)F_{CcBbaa}(i-1) + 0.03125M_{Ccbbaa}(i-1)(1-\Phi)(1-\Phi)F_{CcBbAa}(i-1) \\
& + 0.25M_{Ccbbaa}(i-1)F_{CCbbaa}(i-1) + 0.125M_{Ccbbaa}(i-1)F_{CcbbAa}(i-1) + 0.125M_{Ccbbaa}(i-1)(1-\Phi) \\
& F_{CCBbaa}(i-1) + 0.0625M_{Ccbbaa}(i-1)(1-\Phi)(1-\Phi)F_{CCBbAa}(i-1) + 0.125(1-\Phi)M_{CcBbaa}(i-1)F_{Ccbbaa}(i-1) \\
& + 0.0625(1-\Phi)M_{CcBbaa}(i-1)F_{Ccbbaa}(i-1) + 0.0625(1-\Phi)M_{CcBbaa}(i-1)(1-\Phi)F_{CcBbaa}(i-1) + \\
& 0.03125(1-\Phi)M_{CcBbaa}(i-1)(1-\Phi)(1-\Phi)F_{CcBbAa}(i-1) + 0.25(1-\Phi)M_{CcBbaa}(i-1)F_{CCbbaa}(i-1) \\
& + 0.125(1-\Phi)M_{CcBbaa}(i-1)F_{CCbbAa}(i-1) + 0.125(1-\Phi)M_{CcBbaa}(i-1)(1-\Phi)F_{CCBbaa}(i-1) + \\
& 0.0625(1-\Phi)M_{CcBbaa}(i-1)(1-\Phi)(1-\Phi)F_{CCBbAa}(i-1) + 0.0625(1-\Phi)(1-\Phi)M_{CcBbAa}(i-1)(1-\Phi) \\
& F_{CcBbaa}(i-1) + 0.015625(1-\Phi)(1-\Phi)M_{CcBbAa}(i-1)(1-\Phi)(1-\Phi)F_{CcBbAa}(i-1) + 0.125(1-\Phi)(1-\Phi) \\
& M_{CcBbAa}(i-1)F_{CCbbaa}(i-1) + 0.0625(1-\Phi)(1-\Phi)M_{CcBbAa}(i-1)F_{Ccbbaa}(i-1) + 0.0625(1-\Phi)(1-\Phi) \\
& M_{CcBbAa}(i-1)(1-\Phi)F_{CCBbaa}(i-1) + 0.03125(1-\Phi)(1-\Phi)M_{CcBbAa}(i-1)(1-\Phi)(1-\Phi)F_{CCBbAa}(i-1) + \\
& 0.5M_{CCbbaa}(i-1)F_{Ccbbaa}(i-1) + 0.25M_{CCbbaa}(i-1)F_{Ccbbaa}(i-1) + 0.25M_{CCbbaa}(i-1)(1-\Phi)F_{CcBbaa}(i-1) \\
& + 0.125M_{CCbbaa}(i-1)(1-\Phi)(1-\Phi)F_{CcBbAa}(i-1) + M_{CCbbaa}(i-1)F_{CCbbaa}(i-1) + 0.5M_{CCbbaa}(i-1) \\
& F_{Ccbbaa}(i-1) + 0.5M_{CCbbaa}(i-1)(1-\Phi)F_{CCBbaa}(i-1) + 0.25M_{CCbbaa}(i-1)(1-\Phi)(1-\Phi)F_{CCBbAa}(i-1) \\
& + 0.25M_{CCbbaa}(i-1)F_{Ccbbaa}(i-1) + 0.125M_{CCbbaa}(i-1)F_{Ccbbaa}(i-1) + 0.125M_{CCbbaa}(i-1)(1-\Phi) \\
& F_{CcBbaa}(i-1) + 0.0625M_{CCbbaa}(i-1)(1-\Phi)(1-\Phi)F_{CcBbAa}(i-1) + 0.5M_{CCbbaa}(i-1)F_{CCbbaa}(i-1) \\
& + 0.25M_{CCbbaa}(i-1)F_{CCbbAa}(i-1) + 0.25M_{CCbbaa}(i-1)(1-\Phi)F_{CCBbaa}(i-1) + 0.125M_{CCbbaa}(i-1) \\
& (1-\Phi)(1-\Phi)F_{CCBbAa}(i-1) + 0.25(1-\Phi)M_{CCBbaa}(i-1)F_{Ccbbaa}(i-1) + 0.125(1-\Phi)M_{CCBbaa}(i-1) \\
& F_{Ccbbaa}(i-1) + 0.125(1-\Phi)M_{CCBbaa}(i-1)(1-\Phi)F_{CcBbaa}(i-1) + 0.0625(1-\Phi)M_{CCBbaa}(i-1)(1-\Phi) \\
& (1-\Phi)F_{CcBbAa}(i-1) + 0.5(1-\Phi)M_{CCBbaa}(i-1)F_{Ccbbaa}(i-1) + 0.25(1-\Phi)M_{CCBbaa}(i-1)F_{Ccbbaa}(i-1) + \\
& 0.25(1-\Phi)M_{CCBbaa}(i-1)(1-\Phi)F_{CCBbaa}(i-1) + 0.125(1-\Phi)M_{CCBbaa}(i-1)(1-\Phi)(1-\Phi)F_{CCBbAa}(i-1) \\
& + 0.125(1-\Phi)(1-\Phi)M_{CCBbAa}(i-1)F_{Ccbbaa}(i-1) + 0.0625(1-\Phi)(1-\Phi)M_{CCBbAa}(i-1)F_{Ccbbaa}(i-1) \\
& + 0.0625M_{Ccbbaa}(i-1)(1-\Phi)\Phi F_{CcBbAa}(i-1) + 0.0625M_{Ccbbaa}(i-1)(1-\Phi)F_{CcBbAA}(i-1) + 0.25M_{Ccbbaa}(i-1) \\
& F_{Ccbbaa}(i-1) + 0.25M_{Ccbbaa}(i-1)F_{Ccbbaa}(i-1) + 0.25M_{Ccbbaa}(i-1)F_{CCbbAA}(i-1) + 0.125M_{Ccbbaa}(i-1) \\
& (1-\Phi)F_{CCBbaa}(i-1) + 0.125M_{Ccbbaa}(i-1)(1-\Phi)(1-\Phi)F_{CCBbAa}(i-1) + 0.125M_{Ccbbaa}(i-1)(1-\Phi) \\
& F_{CCBbAa}(i-1)],
\end{aligned}$$

$$\begin{aligned}
M_{CCbbAa}^e &= \left( \frac{\bar{\Omega}_{CCbbAa}}{2} \right) [0.125M_{Ccbbaa}(i-1)F_{Ccbbaa}(i-1) + 0.25M_{Ccbbaa}(i-1)F_{CcbbAA}(i-1) + \\
& 0.0625M_{Ccbbaa}(i-1)(1-\Phi)(1-\Phi)F_{CcBbAa}(i-1) + 0.125M_{Ccbbaa}(i-1)(1-\Phi)\Phi F_{CcBbAa}(i-1) + \\
& 0.125M_{Ccbbaa}(i-1)(1-\Phi)F_{CcBbAA}(i-1) + 0.25M_{Ccbbaa}(i-1)F_{CCbbAa}(i-1) + 0.5M_{Ccbbaa}(i-1)F_{CCbbAA}(i-1) \\
& + 0.125M_{Ccbbaa}(i-1)(1-\Phi)(1-\Phi)F_{CCBbAa}(i-1) + 0.25M_{Ccbbaa}(i-1)(1-\Phi)F_{CCBbAA}(i-1) + \\
& 0.125M_{Ccbbaa}(i-1)F_{Ccbbaa}(i-1) + 0.125M_{Ccbbaa}(i-1)F_{Ccbbaa}(i-1) + 0.125M_{Ccbbaa}(i-1)F_{Ccbbaa}(i-1) \\
& + 0.0625M_{Ccbbaa}(i-1)(1-\Phi)F_{CcBbaa}(i-1) + 0.0625M_{Ccbbaa}(i-1)(1-\Phi)(1-\Phi)F_{CcBbAa}(i-1) + \\
& 0.0625M_{Ccbbaa}(i-1)(1-\Phi)\Phi F_{CcBbAa}(i-1) + 0.0625M_{Ccbbaa}(i-1)(1-\Phi)F_{CcBbAA}(i-1) + 0.25M_{Ccbbaa}(i-1) \\
& F_{Ccbbaa}(i-1) + 0.25M_{Ccbbaa}(i-1)F_{Ccbbaa}(i-1) + 0.25M_{Ccbbaa}(i-1)F_{CCbbAA}(i-1) + 0.125M_{Ccbbaa}(i-1) \\
& (1-\Phi)F_{CCBbaa}(i-1) + 0.125M_{Ccbbaa}(i-1)(1-\Phi)(1-\Phi)F_{CCBbAa}(i-1) + 0.125M_{Ccbbaa}(i-1)(1-\Phi) \\
& F_{CCBbAa}(i-1)],
\end{aligned}$$









$$\begin{aligned}
& \Phi)M_{CCBbAa}(i-1)\Phi(1-\Phi)F_{CCBbAa}(i-1)+0.125(1-\Phi)(1-\Phi)M_{CCBbAa}(i-1)(1-\Phi)\Phi F_{CCBbAa}(i-1)+ \\
& 0.25(1-\Phi)(1-\Phi)M_{CCBbAa}(i-1)F_{CCBbAa}(i-1)+0.125(1-\Phi)(1-\Phi)M_{CCBbAa}(i-1)(1-\Phi)F_{CCBbAa}(i-1) \\
& +0.25\Phi(1-\Phi)M_{CCBbAa}(i-1)F_{CcBbaa}(i-1)+0.125\Phi(1-\Phi)M_{CCBbAa}(i-1)F_{CcBbaa}(i-1)+0.125\Phi(1- \\
& \Phi)M_{CCBbAa}(i-1)(1-\Phi)F_{CcBbaa}(i-1)+0.0625\Phi(1-\Phi)M_{CCBbAa}(i-1)(1-\Phi)(1-\Phi)F_{CcBbaa}(i-1)+ \\
& 0.5\Phi(1-\Phi)M_{CCBbAa}(i-1)F_{CCbbaa}(i-1)+0.25\Phi(1-\Phi)M_{CCBbAa}(i-1)F_{CCbbaa}(i-1)+0.25\Phi(1- \\
& \Phi)M_{CCBbAa}(i-1)(1-\Phi)F_{CCbbaa}(i-1)+0.125\Phi(1-\Phi)M_{CCBbAa}(i-1)(1-\Phi)(1-\Phi)F_{CCbbaa}(i-1) \\
& +0.5M_{CCBbAa}(i-1)F_{CcBbaa}(i-1)+0.25M_{CCBbAa}(i-1)F_{CcBbaa}(i-1)+0.25M_{CCBbAa}(i-1)(1- \\
& \Phi)F_{CcBbaa}(i-1)+0.125M_{CCBbAa}(i-1)(1-\Phi)(1-\Phi)F_{CcBbaa}(i-1)+M_{CCBbAa}(i-1)F_{CcBbaa}(i-1)+ \\
& 0.5M_{CCBbAa}(i-1)F_{CCbbaa}(i-1)+0.5M_{CCBbAa}(i-1)(1-\Phi)F_{CCbbaa}(i-1)+0.25M_{CCBbAa}(i-1)(1-\Phi)(1- \\
& \Phi)F_{CCbbaa}(i-1)+0.25(1-\Phi)M_{CCBbAa}(i-1)F_{CcBbaa}(i-1)+0.125(1-\Phi)M_{CCBbAa}(i-1)F_{CcBbaa}(i-1)+ \\
& 0.125(1-\Phi)M_{CCBbAa}(i-1)(1-\Phi)F_{CcBbaa}(i-1)+0.0625(1-\Phi)M_{CCBbAa}(i-1)(1-\Phi)(1-\Phi)F_{CcBbaa}(i-1) \\
& +0.5(1-\Phi)M_{CCBbAa}(i-1)F_{CCbbaa}(i-1)+0.25(1-\Phi)M_{CCBbAa}(i-1)F_{CCbbaa}(i-1)+0.25(1-\Phi) \\
& \Phi)M_{CCBbAa}(i-1)(1-\Phi)F_{CCbbaa}(i-1)+0.125(1-\Phi)M_{CCBbAa}(i-1)(1-\Phi)(1-\Phi)F_{CCbbaa}(i-1)],
\end{aligned}$$

$$\begin{aligned}
M_{CCBbAa}^e & = \left( \frac{\Omega_{CCBbAa}}{2} \right) [0.0625M_{CcBbaa}(i-1)(1-\Phi)(1-\Phi)F_{CcBbAa}(i-1)+0.125M_{CcBbaa}(i-1)\Phi(1- \\
& \Phi)F_{CcBbAa}(i-1)+0.125M_{CcBbaa}(i-1)(1-\Phi)\Phi F_{CcBbAa}(i-1)+0.25M_{CcBbaa}(i-1)\Phi\Phi F_{CcBbAa}(i-1) \\
& +0.125M_{CcBbaa}(i-1)(1-\Phi)F_{CcBbAa}(i-1)+0.25M_{CcBbaa}(i-1)\Phi F_{CcBbAa}(i-1)+0.125M_{CcBbaa}(i-1) \\
& (1-\Phi)F_{CcBbAa}(i-1)+0.25M_{CcBbaa}(i-1)\Phi F_{CcBbAa}(i-1)+0.25M_{CcBbaa}(i-1)F_{CcBbAa}(i-1)+ \\
& 0.125M_{CcBbaa}(i-1)(1-\Phi)(1-\Phi)F_{CcBbAa}(i-1)+0.25M_{CcBbaa}(i-1)\Phi(1-\Phi)F_{CcBbAa}(i-1)+0.25M_{CcBbaa}(i-1) \\
& (1-\Phi)\Phi F_{CcBbAa}(i-1)+0.5M_{CcBbaa}(i-1)\Phi\Phi F_{CcBbAa}(i-1)+0.25M_{CcBbaa}(i-1)(1-\Phi)F_{CcBbAa}(i-1) \\
& +0.5M_{CcBbaa}(i-1)\Phi F_{CcBbAa}(i-1)+0.25M_{CcBbaa}(i-1)(1-\Phi)F_{CcBbAa}(i-1)+0.5M_{CcBbaa}(i-1) \\
& \Phi F_{CcBbAa}(i-1)+0.5M_{CcBbaa}(i-1)F_{CcBbAa}(i-1)+0.0625M_{CcBbAa}(i-1)(1-\Phi)F_{CcBbaa}(i-1)+ \\
& 0.125M_{CcBbAa}(i-1)\Phi F_{CcBbaa}(i-1)+0.0625M_{CcBbAa}(i-1)(1-\Phi)(1-\Phi)F_{CcBbAa}(i-1)+0.125M_{CcBbAa}(i-1) \\
& \Phi(1-\Phi)F_{CcBbAa}(i-1)+0.0625M_{CcBbAa}(i-1)(1-\Phi)\Phi F_{CcBbAa}(i-1)+0.125M_{CcBbAa}(i-1)\Phi\Phi F_{CcBbAa}(i-1) \\
& +0.0625M_{CcBbAa}(i-1)(1-\Phi)F_{CcBbAa}(i-1)+0.125M_{CcBbAa}(i-1)\Phi F_{CcBbAa}(i-1)+0.125M_{CcBbAa}(i-1) \\
& F_{CcBbAa}(i-1)+0.125M_{CcBbAa}(i-1)(1-\Phi)F_{CcBbAa}(i-1)+0.125M_{CcBbAa}(i-1)\Phi F_{CcBbAa}(i-1)+ \\
& 0.125M_{CcBbAa}(i-1)F_{CcBbAa}(i-1)+0.125M_{CcBbAa}(i-1)(1-\Phi)F_{CCbbaa}(i-1)+0.25M_{CcBbAa}(i-1)\Phi(1- \\
& \Phi)F_{CCbbaa}(i-1)+0.125M_{CcBbAa}(i-1)(1-\Phi)(1-\Phi)F_{CCbbaa}(i-1)+0.25M_{CcBbAa}(i-1)\Phi(1- \\
& \Phi)F_{CCbbaa}(i-1)+0.25M_{CcBbAa}(i-1)(1-\Phi)\Phi F_{CCbbaa}(i-1)+0.25M_{CcBbAa}(i-1)\Phi\Phi F_{CCbbaa}(i-1) \\
& +0.125M_{CcBbAa}(i-1)(1-\Phi)F_{CCbbaa}(i-1)+0.0625M_{CcBbAa}(i-1)(1-\Phi)F_{CcBbaa}(i-1)+ \\
& 0.125M_{CcBbAa}(i-1)\Phi F_{CcBbaa}(i-1)+0.0625M_{CcBbAa}(i-1)(1-\Phi)F_{CcBbaa}(i-1)+0.125M_{CcBbAa}(i-1) \\
& \Phi(1-\Phi)F_{CcBbaa}(i-1)+0.0625M_{CcBbAa}(i-1)(1-\Phi)\Phi F_{CcBbaa}(i-1)+0.125M_{CcBbAa}(i-1)\Phi\Phi F_{CcBbaa}(i-1) \\
& +0.0625M_{CcBbAa}(i-1)(1-\Phi)F_{CcBbAA}(i-1)+0.125M_{CcBbAa}(i-1)\Phi F_{CcBbAA}(i-1)+0.125M_{CcBbAa}(i-1) \\
& F_{CcBbAA}(i-1)+0.125M_{CcBbAa}(i-1)(1-\Phi)F_{CcBbAA}(i-1)+0.25M_{CcBbAa}(i-1)\Phi F_{CcBbAA}(i-1)+ \\
& 0.125M_{CcBbAa}(i-1)F_{CcBbAA}(i-1)+0.125M_{CcBbAa}(i-1)(1-\Phi)F_{CCbbaa}(i-1)+0.25M_{CcBbAa}(i-1)\Phi(1- \\
& \Phi)F_{CCbbaa}(i-1)+0.125M_{CcBbAa}(i-1)(1-\Phi)(1-\Phi)F_{CCbbaa}(i-1)+0.25M_{CcBbAa}(i-1)\Phi(1- \\
& \Phi)F_{CCbbaa}(i-1)+0.25M_{CcBbAa}(i-1)(1-\Phi)\Phi F_{CCbbaa}(i-1)+0.25M_{CcBbAa}(i-1)\Phi\Phi F_{CCbbaa}(i-1) \\
& +0.125M_{CcBbAa}(i-1)(1-\Phi)F_{CCbbaa}(i-1)+0.0625(1-\Phi)M_{CcBbaa}(i-1)F_{CcBbAA}(i-1)+0.0625(1- \\
& \Phi)M_{CcBbaa}(i-1)(1-\Phi)(1-\Phi)F_{CcBbAA}(i-1)+0.0625(1-\Phi)M_{CcBbaa}(i-1)\Phi(1-\Phi)F_{CcBbAA}(i-1) \\
& +0.125(1-\Phi)M_{CcBbaa}(i-1)(1-\Phi)\Phi F_{CcBbAA}(i-1)+0.125(1-\Phi)M_{CcBbaa}(i-1)\Phi\Phi F_{CcBbAA}(i-1) \\
& +0.125(1-\Phi)M_{CcBbaa}(i-1)(1-\Phi)F_{CcBbAA}(i-1)+0.125(1-\Phi)M_{CcBbaa}(i-1)\Phi F_{CcBbAA}(i-1)+ \\
& 0.0625(1-\Phi)M_{CcBbaa}(i-1)(1-\Phi)F_{CcBbAA}(i-1)+0.125(1-\Phi)M_{CcBbaa}(i-1)\Phi F_{CcBbAA}(i-1)+ \\
& 0.125(1-\Phi)M_{CcBbaa}(i-1)F_{CcBbAA}(i-1)+0.125(1-\Phi)M_{CcBbaa}(i-1)(1-\Phi)F_{CcBbAA}(i-1)+0.25(1- \\
& \Phi)M_{CcBbaa}(i-1)\Phi(1-\Phi)F_{CcBbAA}(i-1)+0.125(1-\Phi)M_{CcBbaa}(i-1)(1-\Phi)\Phi F_{CcBbAA}(i-1)+0.25(1- \\
& \Phi)M_{CcBbaa}(i-1)\Phi\Phi F_{CcBbAA}(i-1)+0.125(1-\Phi)M_{CcBbaa}(i-1)(1-\Phi)F_{CCBBAA}(i-1)+0.25(1- \\
& \Phi)M_{CcBbaa}(i-1)\Phi F_{CCBBAA}(i-1)+0.25(1-\Phi)M_{CcBbaa}(i-1)F_{CCBBAA}(i-1)+0.125\Phi M_{CcBbaa}(i-1) \\
& F_{CcBbAA}(i-1)+0.25\Phi M_{CcBbaa}(i-1)F_{CcBbAA}(i-1)+0.0625\Phi M_{CcBbaa}(i-1)(1-\Phi)(1-\Phi)F_{CcBbAA}(i-1) \\
& +0.125\Phi M_{CcBbaa}(i-1)(1-\Phi)\Phi F_{CcBbAA}(i-1)+0.125\Phi M_{CcBbaa}(i-1)(1-\Phi)F_{CcBbAA}(i-1)+ \\
& 0.25\Phi M_{CcBbaa}(i-1)F_{CcBbAA}(i-1)+0.5\Phi M_{CcBbaa}(i-1)F_{CCbbAA}(i-1)+0.125\Phi M_{CcBbaa}(i-1)(1- \\
& \Phi)(1-\Phi)F_{CCbbAA}(i-1)+0.25\Phi M_{CcBbaa}(i-1)(1-\Phi)F_{CCbbAA}(i-1)+0.0625(1-\Phi)(1-\Phi)M_{CcBbAa}(i-1) \\
& F_{CcbbAA}(i-1)+0.0625(1-\Phi)(1-\Phi)M_{CcBbAa}(i-1)F_{CcbbAA}(i-1)+0.0625(1-\Phi)(1-\Phi)M_{CcBbAa}(i-1) \\
& F_{CcbbAA}(i-1)+0.0625(1-\Phi)(1-\Phi)M_{CcBbAa}(i-1)(1-\Phi)F_{CcBbaa}(i-1)+0.0625(1-\Phi)(1-\Phi) \\
& \Phi)M_{CcBbAa}(i-1)\Phi(1-\Phi)F_{CcBbAa}(i-1)+0.0625(1-\Phi)(1-\Phi)M_{CcBbAa}(i-1)(1-\Phi)\Phi F_{CcBbAa}(i-1) \\
& +0.0625(1-\Phi)(1-\Phi)M_{CcBbAa}(i-1)\Phi\Phi F_{CcBbAa}(i-1)+0.0625(1-\Phi)(1-\Phi)M_{CcBbAa}(i-1)(1- \\
& \Phi)\Phi F_{CcBbAa}(i-1)+0.0625(1-\Phi)(1-\Phi)M_{CcBbAa}(i-1)\Phi\Phi F_{CcBbAa}(i-1)+0.0625(1-\Phi)(1-\Phi)
\end{aligned}$$



$$\begin{aligned}
&1)F_{CCbbaa}(i-1) + 0.25M_{CcBBAA}(i-1)F_{CCbbAa}(i-1) + 0.25M_{CcBBAA}(i-1)(1-\Phi)F_{CCbbaa}(i-1) + \\
&0.125M_{CcBBAA}(i-1)(1-\Phi)(1-\Phi)F_{CCBbAa}(i-1) + 0.125M_{CCbbaa}(i-1)(1-\Phi)(1-\Phi)F_{CcBbAa}(i-1) + \\
&0.25M_{CCbbaa}(i-1)\Phi(1-\Phi)F_{CcBbAa}(i-1) + 0.25M_{CCbbaa}(i-1)(1-\Phi)\Phi F_{CcBbAa}(i-1) + 0.5M_{CCbbaa}(i-1) \\
&\Phi\Phi F_{CcBbAa}(i-1) + 0.25M_{CCbbaa}(i-1)(1-\Phi)F_{CcBBAA}(i-1) + 0.5M_{CCbbaa}(i-1)\Phi F_{CcBBAA}(i-1) + \\
&0.25M_{CCbbaa}(i-1)(1-\Phi)F_{CcBBAA}(i-1) + 0.5M_{CCbbaa}(i-1)\Phi F_{CcBBAA}(i-1) + 0.5M_{CCbbaa}(i-1) \\
&F_{CcBBAA}(i-1) + 0.25M_{CCbbaa}(i-1)(1-\Phi)(1-\Phi)F_{CCBbAa}(i-1) + 0.5M_{CCbbaa}(i-1)\Phi(1-\Phi)F_{CCBbAa}(i-1) \\
&+ 0.5M_{CCbbaa}(i-1)(1-\Phi)\Phi F_{CCBbAa}(i-1) + M_{CCbbaa}(i-1)\Phi\Phi F_{CCBbAa}(i-1) + 0.5M_{CCbbaa}(i-1) \\
&(1-\Phi)F_{CCBbAa}(i-1) + M_{CCbbaa}(i-1)\Phi F_{CCBbAa}(i-1) + 0.5M_{CCbbaa}(i-1)(1-\Phi)F_{CCBbAa}(i-1) + \\
&M_{CCbbaa}(i-1)\Phi F_{CCBbAa}(i-1) + M_{CCbbaa}(i-1)F_{CCBbAa}(i-1) + 0.125M_{CCbbaa}(i-1)(1-\Phi) \\
&\Phi F_{CcBbaa}(i-1) + 0.25M_{CCbbaa}(i-1)\Phi F_{CcBbaa}(i-1) + 0.125M_{CCbbaa}(i-1)(1-\Phi)(1-\Phi)F_{CcBbaa}(i-1) + \\
&0.25M_{CCbbaa}(i-1)\Phi(1-\Phi)F_{CcBbaa}(i-1) + 0.125M_{CCbbaa}(i-1)(1-\Phi)\Phi F_{CcBbaa}(i-1) + 0.25M_{CCbbaa}(i-1) \\
&\Phi\Phi F_{CcBbaa}(i-1) + 0.125M_{CCbbaa}(i-1)(1-\Phi)F_{CcBBAA}(i-1) + 0.25M_{CCbbaa}(i-1)\Phi F_{CcBBAA}(i-1) + \\
&0.25M_{CCbbaa}(i-1)F_{CcBBAA}(i-1) + 0.25M_{CCbbaa}(i-1)(1-\Phi)F_{CcBBAA}(i-1) + 0.25M_{CCbbaa}(i-1) \\
&\Phi F_{CcBBAA}(i-1) + 0.25M_{CCbbaa}(i-1)F_{CcBBAA}(i-1) + 0.25M_{CCbbaa}(i-1)(1-\Phi)F_{CCbbaa}(i-1) + \\
&0.5M_{CCbbaa}(i-1)\Phi F_{CCbbaa}(i-1) + 0.25M_{CCbbaa}(i-1)(1-\Phi)(1-\Phi)F_{CCbbaa}(i-1) + 0.5M_{CCbbaa}(i-1) \\
&\Phi(1-\Phi)F_{CCbbaa}(i-1) + 0.5M_{CCbbaa}(i-1)(1-\Phi)\Phi F_{CCbbaa}(i-1) + 0.5M_{CCbbaa}(i-1)\Phi\Phi F_{CCbbaa}(i-1) \\
&+ 0.25M_{CCbbaa}(i-1)(1-\Phi)F_{CCBbAA}(i-1) + 0.5M_{CCbbaa}(i-1)\Phi F_{CCBbAA}(i-1) + 0.5M_{CCbbaa}(i-1) \\
&F_{CCBbAA}(i-1) + 0.5M_{CCbbaa}(i-1)(1-\Phi)F_{CCBbAA}(i-1) + 0.5M_{CCbbaa}(i-1)\Phi F_{CCBbAA}(i-1) + \\
&0.5M_{CCbbaa}(i-1)F_{CCBbAA}(i-1) + 0.25M_{CCbbaa}(i-1)(1-\Phi)F_{CcBbaa}(i-1) + 0.5M_{CCbbaa}(i-1)\Phi F_{CcBbaa}(i-1) \\
&+ 0.125M_{CCbbaa}(i-1)(1-\Phi)(1-\Phi)F_{CcBbaa}(i-1) + 0.25M_{CCbbaa}(i-1)\Phi(1-\Phi)F_{CcBbaa}(i-1) + \\
&0.5M_{CCbbaa}(i-1)F_{CcBbaa}(i-1) + 0.25M_{CCbbaa}(i-1)(1-\Phi)F_{CcBBAA}(i-1) + 0.5M_{CCbbaa}(i-1) \\
&\Phi F_{CcBBAA}(i-1) + 0.5M_{CCbbaa}(i-1)(1-\Phi)F_{CcBBAA}(i-1) + 0.5M_{CCbbaa}(i-1)\Phi F_{CcBBAA}(i-1) + \\
&0.5M_{CCbbaa}(i-1)F_{CcBBAA}(i-1) + 0.25M_{CCbbaa}(i-1)(1-\Phi)(1-\Phi)F_{CCbbaa}(i-1) + 0.5M_{CCbbaa}(i-1) \\
&\Phi(1-\Phi)F_{CCbbaa}(i-1) + M_{CCbbaa}(i-1)\Phi F_{CCbbaa}(i-1) + 0.25M_{CCbbaa}(i-1)(1-\Phi)(1-\Phi)F_{CCbbaa}(i-1) \\
&+ 0.5M_{CCbbaa}(i-1)\Phi(1-\Phi)F_{CCbbaa}(i-1) + 0.5M_{CCbbaa}(i-1)(1-\Phi)\Phi F_{CCbbaa}(i-1) + M_{CCbbaa}(i-1) \\
&F_{CCbbaa}(i-1) + 0.5M_{CCbbaa}(i-1)(1-\Phi)F_{CCBbAA}(i-1) + 0.125(1-\Phi)M_{CCbbaa}(i-1)F_{CcbbAa}(i-1) \\
&+ 0.25(1-\Phi)M_{CCbbaa}(i-1)F_{CcbbAa}(i-1) + 0.125(1-\Phi)M_{CCbbaa}(i-1)(1-\Phi)(1-\Phi)F_{CcBbAa}(i-1) \\
&+ 0.125(1-\Phi)M_{CCbbaa}(i-1)\Phi(1-\Phi)F_{CcBbAa}(i-1) + 0.25(1-\Phi)M_{CCbbaa}(i-1)(1-\Phi)\Phi F_{CcBbAa}(i-1) \\
&+ 0.25(1-\Phi)M_{CCbbaa}(i-1)\Phi\Phi F_{CcBbAa}(i-1) + 0.25(1-\Phi)M_{CCbbaa}(i-1)(1-\Phi)F_{CcBBAA}(i-1) + \\
&0.25(1-\Phi)M_{CCbbaa}(i-1)\Phi F_{CcBBAA}(i-1) + 0.25(1-\Phi)M_{CCbbaa}(i-1)F_{CcBBAA}(i-1) + 0.25(1-\Phi) \\
&\Phi F_{CcBBAA}(i-1) + 0.25(1-\Phi)M_{CCbbaa}(i-1)(1-\Phi)F_{CcBBAA}(i-1) + 0.25(1-\Phi)M_{CCbbaa}(i-1) \\
&\Phi F_{CcBBAA}(i-1) + 0.25(1-\Phi)M_{CCbbaa}(i-1)F_{CcBBAA}(i-1) + 0.125\Phi M_{CCbbaa}(i-1)F_{CcBbAA}(i-1) \\
&+ 0.25\Phi M_{CCbbaa}(i-1)\Phi F_{CcBbAA}(i-1) + 0.25\Phi M_{CCbbaa}(i-1)(1-\Phi)F_{CcBbAA}(i-1) + 0.5\Phi M_{CCbbaa}(i-1) \\
&(1-\Phi)F_{CcBbAA}(i-1) + 0.5\Phi M_{CCbbaa}(i-1)\Phi F_{CcBbAA}(i-1) + 0.25\Phi M_{CCbbaa}(i-1)F_{CcBbAA}(i-1) + \\
&0.25\Phi M_{CCbbaa}(i-1)(1-\Phi)F_{CcBbAA}(i-1) + 0.5\Phi M_{CCbbaa}(i-1)(1-\Phi)\Phi F_{CcBbAA}(i-1) + 0.25(1-\Phi) \\
&(1-\Phi)M_{CCbbaa}(i-1)F_{CcBbAA}(i-1) + 0.125(1-\Phi)(1-\Phi)M_{CCbbaa}(i-1)F_{CcBbAA}(i-1) + 0.125(1-\Phi) \\
&\Phi F_{CcBbAA}(i-1) + 0.125(1-\Phi)(1-\Phi)M_{CCbbaa}(i-1)F_{CcBbAA}(i-1) + 0.125(1-\Phi)(1-\Phi)F_{CcBbAA}(i-1) \\
&+ 0.125(1-\Phi)(1-\Phi)M_{CCbbaa}(i-1)\Phi F_{CcBbAA}(i-1) + 0.125(1-\Phi)(1-\Phi)M_{CCbbaa}(i-1)F_{CcBbAA}(i-1) \\
&+ 0.125(1-\Phi)(1-\Phi)M_{CCbbaa}(i-1)(1-\Phi)F_{CcBBAA}(i-1) + 0.125(1-\Phi)(1-\Phi)M_{CCbbaa}(i-1)\Phi F_{CcBBAA}(i-1) \\
&+ 0.125(1-\Phi)(1-\Phi)M_{CCbbaa}(i-1)F_{CcBBAA}(i-1) + 0.25(1-\Phi)(1-\Phi)M_{CCbbaa}(i-1)F_{CCbbaa}(i-1) \\
&+ 0.25(1-\Phi)(1-\Phi)M_{CCbbaa}(i-1)F_{CCbbaa}(i-1) + 0.25(1-\Phi)(1-\Phi)M_{CCbbaa}(i-1)F_{CCbbaa}(i-1) \\
&+ 0.25(1-\Phi)(1-\Phi)M_{CCbbaa}(i-1)(1-\Phi)F_{CCbbaa}(i-1) + 0.25(1-\Phi)(1-\Phi)M_{CCbbaa}(i-1)\Phi F_{CCbbaa}(i-1) \\
&+ 0.25(1-\Phi)(1-\Phi)M_{CCbbaa}(i-1)\Phi\Phi F_{CCbbaa}(i-1) + 0.25(1-\Phi)(1-\Phi)M_{CCbbaa}(i-1)F_{CCBbAA}(i-1) \\
&+ 0.25(1-\Phi)(1-\Phi)M_{CCbbaa}(i-1)F_{CCBbAA}(i-1) + 0.25\Phi(1-\Phi)M_{CCbbaa}(i-1)F_{CcbbAa}(i-1) + \\
&0.25\Phi(1-\Phi)M_{CCbbaa}(i-1)F_{CcbbAa}(i-1) + 0.25\Phi(1-\Phi)M_{CCbbaa}(i-1)F_{CcbbAA}(i-1) + 0.125\Phi(1-\Phi) \\
&M_{CCbbaa}(i-1)(1-\Phi)F_{CcBbaa}(i-1) + 0.125\Phi(1-\Phi)M_{CCbbaa}(i-1)(1-\Phi)(1-\Phi)F_{CcBbAA}(i-1) + \\
&0.125\Phi(1-\Phi)M_{CCbbaa}(i-1)(1-\Phi)\Phi F_{CcBbAA}(i-1) + 0.125\Phi(1-\Phi)M_{CCbbaa}(i-1)(1-\Phi)F_{CcBbAA}(i-1)
\end{aligned}$$









$$\begin{aligned}
& \Phi)M_{CCBbAA}(i-1)\Phi(1-\Phi)F_{CCBbAA}(i-1) + 0.25(1-\Phi)M_{CCBbAA}(i-1)(1-\Phi)\Phi F_{CCBbAA}(i-1) + \\
& 0.5(1-\Phi)M_{CCBbAA}(i-1)\Phi\Phi F_{CCBbAA}(i-1) + 0.5(1-\Phi)M_{CCBbAA}(i-1)(1-\Phi)F_{CCBbAA}(i-1) + 0.5(1-\Phi) \\
& \Phi)M_{CCBbAA}(i-1)\Phi F_{CCBbAA}(i-1) + 0.25(1-\Phi)M_{CCBbAA}(i-1)(1-\Phi)F_{CCBbAA}(i-1) + 0.5(1-\Phi) \\
& \Phi)M_{CCBbAA}(i-1)\Phi F_{CCBbAA}(i-1) + 0.5(1-\Phi)M_{CCBbAA}(i-1)F_{CCBbAA}(i-1) + 0.25\Phi M_{CCBbAA}(i-1) \\
& F_{CcbbAa}(i-1) + 0.5\Phi M_{CCBbAA}(i-1)F_{CcbbAa}(i-1) + 0.125\Phi M_{CCBbAA}(i-1)(1-\Phi)(1-\Phi)F_{CcBbAa}(i-1) \\
& + 0.25\Phi M_{CCBbAA}(i-1)(1-\Phi)\Phi F_{CcBbAa}(i-1) + 0.25\Phi M_{CCBbAA}(i-1)(1-\Phi)F_{CcBbAa}(i-1) + \\
& 0.5\Phi M_{CCBbAA}(i-1)F_{CcBbAa}(i-1) + \Phi M_{CCBbAA}(i-1)F_{CcbbAA}(i-1) + 0.25\Phi M_{CCBbAA}(i-1)(1-\Phi) \\
& (1-\Phi)F_{CCBbAa}(i-1) + 0.5\Phi M_{CCBbAA}(i-1)(1-\Phi)F_{CCBbAa}(i-1) + 0.125(1-\Phi)M_{CCBbAA}(i-1) \\
& F_{CcbbAa}(i-1) + 0.25(1-\Phi)M_{CCBbAA}(i-1)F_{CcbbAA}(i-1) + 0.0625(1-\Phi)M_{CCBbAA}(i-1)(1-\Phi)(1-\Phi) \\
& F_{CcBbAa}(i-1) + 0.125(1-\Phi)M_{CCBbAA}(i-1)(1-\Phi)\Phi F_{CcBbAa}(i-1) + 0.125(1-\Phi)M_{CCBbAA}(i-1)(1-\Phi) \\
& F_{CcBbAa}(i-1) + 0.25(1-\Phi)M_{CCBbAA}(i-1)F_{CcbbAA}(i-1) + 0.5(1-\Phi)M_{CCBbAA}(i-1)F_{CCbbAA}(i-1) + \\
& 0.125(1-\Phi)M_{CCBbAA}(i-1)(1-\Phi)(1-\Phi)F_{CCBbAa}(i-1) + 0.25(1-\Phi)M_{CCBbAA}(i-1)(1-\Phi)F_{CCBbAa}(i-1) \\
& + 0.25\Phi M_{CCBbAA}(i-1)F_{CcbbAa}(i-1) + 0.5\Phi M_{CCBbAA}(i-1)F_{CcbbAA}(i-1) + 0.125\Phi M_{CCBbAA}(i-1) \\
& (1-\Phi)(1-\Phi)F_{CcBbAa}(i-1) + 0.25\Phi M_{CCBbAA}(i-1)(1-\Phi)\Phi F_{CcBbAa}(i-1) + 0.25\Phi M_{CCBbAA}(i-1) \\
& (1-\Phi)F_{CcBbAa}(i-1) + 0.5\Phi M_{CCBbAA}(i-1)F_{CCbbAA}(i-1) + \Phi M_{CCBbAA}(i-1)F_{CCbbAA}(i-1) + \\
& 0.25\Phi M_{CCBbAA}(i-1)(1-\Phi)(1-\Phi)F_{CCBbAa}(i-1) + 0.5\Phi M_{CCBbAA}(i-1)(1-\Phi)F_{CCBbAa}(i-1) + \\
& 0.25M_{CCBbAA}(i-1)F_{CcbbAa}(i-1) + 0.5M_{CCBbAA}(i-1)F_{CcbbAA}(i-1) + 0.125M_{CCBbAA}(i-1)(1-\Phi)(1-\Phi) \\
& F_{CcBbAa}(i-1) + 0.25M_{CCBbAA}(i-1)(1-\Phi)\Phi F_{CcBbAa}(i-1) + 0.25M_{CCBbAA}(i-1)(1-\Phi)F_{CcBbAa}(i-1) \\
& + 0.5M_{CCBbAA}(i-1)F_{CCbbAA}(i-1) + M_{CCBbAA}(i-1)F_{CCbbAA}(i-1) + 0.25M_{CCBbAA}(i-1)(1-\Phi) \\
& \Phi(1-\Phi)F_{CCBbAa}(i-1) + 0.5M_{CCBbAA}(i-1)(1-\Phi)F_{CCBbAa}(i-1)],
\end{aligned}$$

$$\begin{aligned}
M_{CCBbAA}^e &= \left( \frac{\bar{\Omega}_{CCBbAA}}{2} \right) [0.0625(1-\Phi)M_{CcBbaa}(i-1)(1-\Phi)F_{CcBbaa}(i-1) + 0.125(1-\Phi)M_{CcBbaa}(i-1) \\
& \Phi F_{CcBbaa}(i-1) + 0.03125(1-\Phi)M_{CcBbaa}(i-1)(1-\Phi)(1-\Phi)F_{CcBbaa}(i-1) + 0.0625(1-\Phi)M_{CcBbaa}(i-1) \\
& \Phi(1-\Phi)F_{CcBbaa}(i-1) + 0.125(1-\Phi)M_{CcBbaa}(i-1)F_{CCBbaa}(i-1) + 0.0625(1-\Phi)M_{CcBbaa}(i-1) \\
& (1-\Phi)F_{CCBbaa}(i-1) + 0.125(1-\Phi)M_{CcBbaa}(i-1)(1-\Phi)F_{CCBbaa}(i-1) + 0.25(1-\Phi)M_{CcBbaa}(i-1) \\
& \Phi F_{CCBbaa}(i-1) + 0.0625(1-\Phi)M_{CcBbaa}(i-1)(1-\Phi)(1-\Phi)F_{CCBbaa}(i-1) + 0.125(1-\Phi)M_{CcBbaa}(i-1) \\
& \Phi(1-\Phi)F_{CCBbaa}(i-1) + 0.125(1-\Phi)M_{CcBbaa}(i-1)(1-\Phi)\Phi F_{CCBbaa}(i-1) + 0.25(1-\Phi)M_{CcBbaa}(i-1) \\
& F_{CCBbaa}(i-1) + 0.125(1-\Phi)M_{CcBbaa}(i-1)(1-\Phi)F_{CCBbaa}(i-1) + 0.125\Phi M_{CcBbaa}(i-1)(1-\Phi) \\
& F_{CcBbaa}(i-1) + 0.25\Phi M_{CcBbaa}(i-1)\Phi F_{CcBbaa}(i-1) + 0.0625\Phi M_{CcBbaa}(i-1)(1-\Phi)(1-\Phi)F_{CcBbaa}(i-1) \\
& + 0.125\Phi M_{CcBbaa}(i-1)\Phi(1-\Phi)F_{CcBbaa}(i-1) + 0.25\Phi M_{CcBbaa}(i-1)F_{CCBbaa}(i-1) + 0.125\Phi M_{CcBbaa}(i-1) \\
& (1-\Phi)F_{CcBBAa}(i-1) + 0.25\Phi M_{CcBbaa}(i-1)(1-\Phi)F_{CCBbaa}(i-1) + 0.5\Phi M_{CcBbaa}(i-1)\Phi F_{CCBbaa}(i-1) \\
& + 0.125\Phi M_{CcBbaa}(i-1)(1-\Phi)(1-\Phi)F_{CCBbaa}(i-1) + 0.25\Phi M_{CcBbaa}(i-1)\Phi(1-\Phi)F_{CCBbaa}(i-1) + \\
& 0.25\Phi M_{CcBbaa}(i-1)(1-\Phi)\Phi F_{CCBbaa}(i-1) + 0.5\Phi M_{CcBbaa}(i-1)F_{CCBbaa}(i-1) + 0.25\Phi M_{CcBbaa}(i-1) \\
& (1-\Phi)F_{CCBBAa}(i-1) + 0.03125(1-\Phi)(1-\Phi)M_{CcBbaa}(i-1)(1-\Phi)F_{CcBbaa}(i-1) + 0.0625(1-\Phi)(1-\Phi) \\
& M_{CcBbaa}(i-1)\Phi F_{CcBbaa}(i-1) + 0.015625(1-\Phi)(1-\Phi)M_{CcBbaa}(i-1)(1-\Phi)(1-\Phi)F_{CcBbaa}(i-1) + \\
& 0.03125(1-\Phi)(1-\Phi)M_{CcBbaa}(i-1)\Phi(1-\Phi)F_{CcBbaa}(i-1) + 0.0625(1-\Phi)(1-\Phi)M_{CcBbaa}(i-1)F_{CCBbaa}(i-1) \\
& + 0.03125(1-\Phi)(1-\Phi)M_{CcBbaa}(i-1)(1-\Phi)F_{CCBBAa}(i-1) + 0.0625(1-\Phi)(1-\Phi)M_{CcBbaa}(i-1)(1-\Phi) \\
& F_{CCBbaa}(i-1) + 0.125(1-\Phi)(1-\Phi)M_{CcBbaa}(i-1)\Phi F_{CCBbaa}(i-1) + 0.03125(1-\Phi)(1-\Phi)M_{CcBbaa}(i-1) \\
& (1-\Phi)(1-\Phi)F_{CCBbaa}(i-1) + 0.0625(1-\Phi)(1-\Phi)M_{CcBbaa}(i-1)\Phi(1-\Phi)F_{CCBbaa}(i-1) + 0.0625(1-\Phi) \\
& (1-\Phi)M_{CcBbaa}(i-1)(1-\Phi)\Phi F_{CCBbaa}(i-1) + 0.125(1-\Phi)(1-\Phi)M_{CcBbaa}(i-1)F_{CCBbaa}(i-1) + \\
& 0.0625(1-\Phi)(1-\Phi)M_{CcBbaa}(i-1)(1-\Phi)F_{CCBBAa}(i-1) + 0.0625\Phi(1-\Phi)M_{CcBbaa}(i-1)(1-\Phi)F_{CcBbaa}(i-1) \\
& + 0.125\Phi(1-\Phi)M_{CcBbaa}(i-1)\Phi F_{CcBbaa}(i-1) + 0.03125\Phi(1-\Phi)M_{CcBbaa}(i-1)(1-\Phi)(1-\Phi)F_{CcBbaa}(i-1) \\
& + 0.0625\Phi(1-\Phi)M_{CcBbaa}(i-1)\Phi(1-\Phi)F_{CcBbaa}(i-1) + 0.125\Phi(1-\Phi)M_{CcBbaa}(i-1)F_{CCBbaa}(i-1) + \\
& 0.0625\Phi(1-\Phi)M_{CcBbaa}(i-1)(1-\Phi)F_{CCBBAa}(i-1) + 0.125\Phi(1-\Phi)M_{CcBbaa}(i-1)(1-\Phi)F_{CCBbaa}(i-1) + \\
& 0.25\Phi(1-\Phi)M_{CcBbaa}(i-1)\Phi F_{CCBbaa}(i-1) + 0.0625\Phi(1-\Phi)M_{CcBbaa}(i-1)(1-\Phi)(1-\Phi)F_{CCBbaa}(i-1) + \\
& 0.125\Phi(1-\Phi)M_{CcBbaa}(i-1)\Phi(1-\Phi)F_{CCBbaa}(i-1) + 0.125\Phi(1-\Phi)M_{CcBbaa}(i-1)(1-\Phi)\Phi F_{CCBbaa}(i-1) \\
& + 0.25\Phi(1-\Phi)M_{CcBbaa}(i-1)F_{CCBbaa}(i-1) + 0.125\Phi(1-\Phi)M_{CcBbaa}(i-1)(1-\Phi)F_{CCBBAa}(i-1) + \\
& 0.125M_{CcBbaa}(i-1)(1-\Phi)F_{CcBbaa}(i-1) + 0.25M_{CcBbaa}(i-1)\Phi F_{CcBbaa}(i-1) + 0.0625M_{CcBbaa}(i-1)(1-\Phi) \\
& (1-\Phi)F_{CcBbaa}(i-1) + 0.125M_{CcBbaa}(i-1)\Phi(1-\Phi)F_{CcBbaa}(i-1) + 0.25M_{CcBbaa}(i-1)F_{CCBbaa}(i-1) + \\
& 0.125M_{CcBbaa}(i-1)(1-\Phi)F_{CCBBAa}(i-1) + 0.25M_{CcBbaa}(i-1)(1-\Phi)F_{CCBbaa}(i-1) + 0.5M_{CcBbaa}(i-1) \\
& \Phi F_{CCBbaa}(i-1) + 0.125M_{CcBbaa}(i-1)(1-\Phi)(1-\Phi)F_{CCBbaa}(i-1) + 0.25M_{CcBbaa}(i-1)\Phi(1-\Phi) \\
& F_{CCBbaa}(i-1) + 0.25M_{CcBbaa}(i-1)(1-\Phi)\Phi F_{CCBbaa}(i-1) + 0.5M_{CcBbaa}(i-1)F_{CCBbaa}(i-1) + \\
& 0.25M_{CcBbaa}(i-1)(1-\Phi)F_{CCBBAa}(i-1) + 0.0625(1-\Phi)M_{CcBbaa}(i-1)(1-\Phi)F_{CcBbaa}(i-1) + 0.125(1-\Phi) \\
& M_{CcBbaa}(i-1)\Phi F_{CcBbaa}(i-1) + 0.03125(1-\Phi)M_{CcBbaa}(i-1)(1-\Phi)(1-\Phi)F_{CcBbaa}(i-1) + 0.0625(1-\Phi) \\
& M_{CcBbaa}(i-1)\Phi(1-\Phi)F_{CcBbaa}(i-1) + 0.125(1-\Phi)M_{CcBbaa}(i-1)F_{CCBbaa}(i-1) + 0.0625(1-\Phi) \\
& M_{CcBbaa}(i-1)(1-\Phi)F_{CCBBAa}(i-1) + 0.125(1-\Phi)M_{CcBbaa}(i-1)(1-\Phi)F_{CCBbaa}(i-1) + 0.25(1-\Phi) \\
& M_{CcBbaa}(i-1)\Phi F_{CCBbaa}(i-1) + 0.0625(1-\Phi)M_{CcBbaa}(i-1)(1-\Phi)(1-\Phi)F_{CCBbaa}(i-1) +
\end{aligned}$$

$$\begin{aligned}
&0.125(1-\Phi)M_{CcBBAa}(i-1)\Phi(1-\Phi)F_{CCBbAa}(i-1) + 0.125(1-\Phi)M_{CcBBAa}(i-1)(1-\Phi)\Phi F_{CCBbAa}(i-1) \\
&+ 0.25(1-\Phi)M_{CcBBAa}(i-1)F_{CCBbAa}(i-1) + 0.125(1-\Phi)M_{CcBBAa}(i-1)(1-\Phi)F_{CCBbAa}(i-1) \\
&+ 0.125(1-\Phi)M_{CCBbaa}(i-1)(1-\Phi)F_{CcBbAa}(i-1) + 0.25(1-\Phi)M_{CCBbaa}(i-1)\Phi F_{CcBbAa}(i-1) + \\
&0.0625(1-\Phi)M_{CCBbaa}(i-1)(1-\Phi)(1-\Phi)F_{CcBbAa}(i-1) + 0.125(1-\Phi)M_{CCBbaa}(i-1)\Phi(1-\Phi)F_{CcBbAa}(i-1) \\
&+ 0.25(1-\Phi)M_{CCBbaa}(i-1)F_{CcBbAa}(i-1) + 0.125(1-\Phi)M_{CCBbaa}(i-1)(1-\Phi)F_{CcBBAa}(i-1) + \\
&0.25(1-\Phi)M_{CCBbaa}(i-1)(1-\Phi)F_{CCBbAa}(i-1) + 0.5(1-\Phi)M_{CCBbaa}(i-1)\Phi F_{CCBbAa}(i-1) + 0.125(1-\Phi) \\
&M_{CCBbaa}(i-1)(1-\Phi)(1-\Phi)F_{CCBbAa}(i-1) + 0.25(1-\Phi)M_{CCBbaa}(i-1)\Phi(1-\Phi)F_{CCBbAa}(i-1) + \\
&0.25(1-\Phi)M_{CCBbaa}(i-1)(1-\Phi)\Phi F_{CCBbAa}(i-1) + 0.5(1-\Phi)M_{CCBbaa}(i-1)F_{CCBbAa}(i-1) + 0.25(1-\Phi) \\
&M_{CCBbaa}(i-1)(1-\Phi)F_{CCBBAa}(i-1) + 0.25\Phi M_{CCBbaa}(i-1)(1-\Phi)F_{CcBbAa}(i-1) + 0.5\Phi M_{CCBbaa}(i-1) \\
&\Phi F_{CcBbAa}(i-1) + 0.125\Phi M_{CCBbaa}(i-1)(1-\Phi)(1-\Phi)F_{CcBbAa}(i-1) + 0.25\Phi M_{CCBbaa}(i-1)\Phi(1-\Phi) \\
&F_{CcBbAa}(i-1) + 0.5\Phi M_{CCBbaa}(i-1)F_{CcBBAa}(i-1) + 0.25\Phi M_{CCBbaa}(i-1)(1-\Phi)F_{CcBBAa}(i-1) + \\
&0.5\Phi M_{CCBbaa}(i-1)(1-\Phi)F_{CCBbAa}(i-1) + \Phi M_{CCBbaa}(i-1)\Phi F_{CCBbAa}(i-1) + 0.25\Phi M_{CCBbaa}(i-1) \\
&(1-\Phi)(1-\Phi)F_{CCBbAa}(i-1) + 0.5\Phi M_{CCBbaa}(i-1)\Phi(1-\Phi)F_{CCBbAa}(i-1) + 0.5\Phi M_{CCBbaa}(i-1) \\
&(1-\Phi)\Phi F_{CCBbAa}(i-1) + \Phi M_{CCBbaa}(i-1)F_{CCBBAa}(i-1) + 0.5\Phi M_{CCBbaa}(i-1)(1-\Phi)F_{CCBBAa}(i-1) \\
&+ 0.0625(1-\Phi)(1-\Phi)M_{CCBbAa}(i-1)(1-\Phi)F_{CcBbAa}(i-1) + 0.125(1-\Phi)(1-\Phi)M_{CCBbAa}(i-1) \\
&\Phi F_{CcBbAa}(i-1) + 0.03125(1-\Phi)(1-\Phi)M_{CCBbAa}(i-1)(1-\Phi)(1-\Phi)F_{CcBbAa}(i-1) + 0.0625(1-\Phi)(1-\Phi) \\
&M_{CCBbAa}(i-1)\Phi(1-\Phi)F_{CcBbAa}(i-1) + 0.125(1-\Phi)(1-\Phi)M_{CCBbAa}(i-1)F_{CcBBAa}(i-1) + 0.0625(1-\Phi) \\
&(1-\Phi)M_{CCBbAa}(i-1)(1-\Phi)F_{CcBBAa}(i-1) + 0.125(1-\Phi)(1-\Phi)M_{CCBbAa}(i-1)(1-\Phi)F_{CCBbaa}(i-1) \\
&+ 0.25(1-\Phi)(1-\Phi)M_{CCBbAa}(i-1)\Phi F_{CCBbaa}(i-1) + 0.0625(1-\Phi)(1-\Phi)M_{CCBbAa}(i-1)(1-\Phi)(1-\Phi) \\
&F_{CCBbAa}(i-1) + 0.125(1-\Phi)(1-\Phi)M_{CCBbAa}(i-1)\Phi(1-\Phi)F_{CCBbAa}(i-1) + 0.125(1-\Phi)(1-\Phi)(1-\Phi) \\
&M_{CCBbAa}(i-1)(1-\Phi)\Phi F_{CCBbAa}(i-1) + 0.25(1-\Phi)(1-\Phi)M_{CCBbAa}(i-1)F_{CCBBAa}(i-1) + 0.125(1-\Phi) \\
&(1-\Phi)M_{CCBbAa}(i-1)(1-\Phi)F_{CCBBAa}(i-1) + 0.125\Phi(1-\Phi)M_{CCBbAa}(i-1)(1-\Phi)F_{CcBbaa}(i-1) + \\
&0.25\Phi(1-\Phi)M_{CCBbAa}(i-1)\Phi F_{CcBbaa}(i-1) + 0.0625\Phi(1-\Phi)M_{CCBbAa}(i-1)(1-\Phi)(1-\Phi)F_{CcBbAa}(i-1) \\
&+ 0.125\Phi(1-\Phi)M_{CCBbAa}(i-1)\Phi(1-\Phi)F_{CcBbAa}(i-1) + 0.25\Phi(1-\Phi)M_{CCBbAa}(i-1)F_{CcBBAa}(i-1) + \\
&0.125\Phi(1-\Phi)M_{CCBbAa}(i-1)(1-\Phi)F_{CcBBAa}(i-1) + 0.25\Phi(1-\Phi)M_{CCBbAa}(i-1)(1-\Phi)F_{CCBbaa}(i-1) \\
&+ 0.5\Phi(1-\Phi)M_{CCBbAa}(i-1)\Phi F_{CCBbaa}(i-1) + 0.125\Phi(1-\Phi)M_{CCBbAa}(i-1)(1-\Phi)(1-\Phi)F_{CCBbAa}(i-1) \\
&+ 0.25\Phi(1-\Phi)M_{CCBbAa}(i-1)\Phi(1-\Phi)F_{CCBbAa}(i-1) + 0.25\Phi(1-\Phi)M_{CCBbAa}(i-1)(1-\Phi)\Phi F_{CCBbAa}(i-1) \\
&+ 0.5\Phi(1-\Phi)M_{CCBbAa}(i-1)F_{CCBBAa}(i-1) + 0.25\Phi(1-\Phi)M_{CCBbAa}(i-1)(1-\Phi)F_{CCBBAa}(i-1) + \\
&0.25M_{CCBbaa}(i-1)(1-\Phi)F_{CcBbaa}(i-1) + 0.5M_{CCBbaa}(i-1)\Phi F_{CcBbaa}(i-1) + 0.125M_{CCBbaa}(i-1)(1-\Phi) \\
&(1-\Phi)F_{CcBbAa}(i-1) + 0.25M_{CCBbaa}(i-1)\Phi(1-\Phi)F_{CcBbAa}(i-1) + 0.5M_{CCBbaa}(i-1)F_{CcBBAa}(i-1) \\
&+ 0.25M_{CCBbaa}(i-1)(1-\Phi)F_{CcBBAa}(i-1) + 0.5M_{CCBbaa}(i-1)(1-\Phi)F_{CCBbaa}(i-1) + M_{CCBbaa}(i-1) \\
&\Phi F_{CCBbaa}(i-1) + 0.25M_{CCBbaa}(i-1)(1-\Phi)(1-\Phi)F_{CCBbAa}(i-1) + 0.5M_{CCBbaa}(i-1)\Phi(1-\Phi) \\
&F_{CCBbAa}(i-1) + 0.5M_{CCBbaa}(i-1)(1-\Phi)\Phi F_{CCBbAa}(i-1) + M_{CCBbaa}(i-1)F_{CCBBAa}(i-1) + 0.25(1-\Phi) \\
&M_{CCBBAa}(i-1)(1-\Phi)F_{CCBBAa}(i-1) + 0.125(1-\Phi)M_{CCBBAa}(i-1)(1-\Phi)F_{CcBbaa}(i-1) + 0.25(1-\Phi) \\
&M_{CCBBAa}(i-1)\Phi F_{CcBbaa}(i-1) + 0.0625(1-\Phi)M_{CCBBAa}(i-1)(1-\Phi)(1-\Phi)F_{CcBbAa}(i-1) + \\
&0.125(1-\Phi)M_{CCBBAa}(i-1)\Phi(1-\Phi)F_{CcBbAa}(i-1) + 0.25(1-\Phi)M_{CCBBAa}(i-1)F_{CcBBAa}(i-1) + \\
&0.125(1-\Phi)M_{CCBBAa}(i-1)(1-\Phi)F_{CcBBAa}(i-1) + 0.25(1-\Phi)M_{CCBBAa}(i-1)(1-\Phi)F_{CCBbaa}(i-1) \\
&+ 0.5(1-\Phi)M_{CCBBAa}(i-1)\Phi F_{CCBbaa}(i-1) + 0.125(1-\Phi)M_{CCBBAa}(i-1)(1-\Phi)(1-\Phi)F_{CCBbAa}(i-1) \\
&+ 0.25(1-\Phi)M_{CCBBAa}(i-1)\Phi(1-\Phi)F_{CCBbAa}(i-1) + 0.25(1-\Phi)M_{CCBBAa}(i-1)(1-\Phi)\Phi F_{CCBbAa}(i-1) \\
&+ 0.5(1-\Phi)M_{CCBBAa}(i-1)F_{CCBBAa}(i-1) + 0.25(1-\Phi)M_{CCBBAa}(i-1)(1-\Phi)F_{CCBBAa}(i-1)],
\end{aligned}$$

$$\begin{aligned}
M_{CCBBAa}^e &= \left(\frac{\bar{\Omega}_{CCBBAa}}{2}\right) [0.03125(1-\Phi)M_{CcBbaa}(i-1)(1-\Phi)(1-\Phi)F_{CcBbAa}(i-1) + 0.0625(1-\Phi) \\
&\Phi M_{CcBbaa}(i-1)\Phi(1-\Phi)F_{CcBbAa}(i-1) + 0.0625(1-\Phi)M_{CcBbaa}(i-1)(1-\Phi)\Phi F_{CcBbAa}(i-1) + \\
&0.125(1-\Phi)M_{CcBbaa}(i-1)\Phi\Phi F_{CcBbAa}(i-1) + 0.0625(1-\Phi)M_{CcBbaa}(i-1)(1-\Phi)F_{CcBbAA}(i-1) + \\
&0.125(1-\Phi)M_{CcBbaa}(i-1)\Phi F_{CcBbAA}(i-1) + 0.0625(1-\Phi)M_{CcBbaa}(i-1)(1-\Phi)F_{CcBBAa}(i-1) + \\
&0.125(1-\Phi)M_{CcBbaa}(i-1)\Phi F_{CcBBAa}(i-1) + 0.125(1-\Phi)M_{CcBbaa}(i-1)F_{CcBBAa}(i-1) + 0.0625(1-\Phi) \\
&\Phi M_{CcBbaa}(i-1)(1-\Phi)(1-\Phi)F_{CCBbAa}(i-1) + 0.125(1-\Phi)M_{CcBbaa}(i-1)\Phi(1-\Phi)F_{CCBbAa}(i-1) \\
&+ 0.125(1-\Phi)M_{CcBbaa}(i-1)(1-\Phi)\Phi F_{CCBbAa}(i-1) + 0.25(1-\Phi)M_{CcBbaa}(i-1)\Phi\Phi F_{CCBbAa}(i-1) \\
&+ 0.125(1-\Phi)M_{CcBbaa}(i-1)(1-\Phi)F_{CCBbAA}(i-1) + 0.25(1-\Phi)M_{CcBbaa}(i-1)\Phi F_{CCBbAA}(i-1) \\
&+ 0.125(1-\Phi)M_{CcBbaa}(i-1)(1-\Phi)F_{CCBBAa}(i-1) + 0.25(1-\Phi)M_{CcBbaa}(i-1)\Phi F_{CCBBAa}(i-1) \\
&+ 0.25(1-\Phi)M_{CcBbaa}(i-1)F_{CCBBAa}(i-1) + 0.0625\Phi M_{CcBbaa}(i-1)(1-\Phi)(1-\Phi)F_{CcBbAa}(i-1) \\
&+ 0.125\Phi M_{CcBbaa}(i-1)\Phi(1-\Phi)F_{CcBbAa}(i-1) + 0.125\Phi M_{CcBbaa}(i-1)(1-\Phi)F_{CcBbAA}(i-1) + \\
&0.25\Phi M_{CcBbaa}(i-1)\Phi\Phi F_{CcBbAa}(i-1) + 0.125\Phi M_{CcBbaa}(i-1)(1-\Phi)F_{CcBbAA}(i-1) + 0.25\Phi M_{CcBbaa}(i-1) \\
&\Phi F_{CcBbAA}(i-1) + 0.125\Phi M_{CcBbaa}(i-1)(1-\Phi)F_{CcBBAa}(i-1) + 0.25\Phi M_{CcBbaa}(i-1)\Phi F_{CcBBAa}(i-1) + \\
&0.25\Phi M_{CcBbaa}(i-1)F_{CcBBAa}(i-1) + 0.125\Phi M_{CcBbaa}(i-1)(1-\Phi)(1-\Phi)F_{CCBbAa}(i-1) + 0.25\Phi M_{CcBbaa}(i-1) \\
&\Phi(1-\Phi)F_{CCBbAa}(i-1) + 0.25\Phi M_{CcBbaa}(i-1)(1-\Phi)\Phi F_{CCBbAa}(i-1) + 0.5\Phi M_{CcBbaa}(i-1)\Phi\Phi F_{CCBbAa}(i-1) \\
&+ 0.25\Phi M_{CcBbaa}(i-1)(1-\Phi)F_{CCBbAA}(i-1) + 0.5\Phi M_{CcBbaa}(i-1)\Phi F_{CCBbAA}(i-1) + 0.25\Phi M_{CcBbaa}(i-1) \\
&\Phi F_{CCBbAA}(i-1)],
\end{aligned}$$













$$\begin{aligned}
& 1)F_{CCBBAA}(i-1)+0.125\Phi\Phi M_{CCBbAa}(i-1)(1-\Phi)(1-\Phi)F_{CcBbAa}(i-1)+0.25\Phi\Phi M_{CCBbAa}(i-1)\Phi(1-\Phi)F_{CcBbAa}(i-1)+0.25\Phi\Phi M_{CCBbAa}(i-1)(1-\Phi)\Phi F_{CcBbAa}(i-1)+0.5\Phi\Phi M_{CCBbAa}(i-1)\Phi\Phi F_{CcBbAa}(i-1)+0.25\Phi\Phi M_{CCBbAa}(i-1)(1-\Phi)F_{CcBbAA}(i-1)+0.5\Phi\Phi M_{CCBbAa}(i-1)\Phi F_{CcBbAA}(i-1)+0.5\Phi\Phi M_{CCBbAa}(i-1)F_{CcBbAA}(i-1)+0.25\Phi\Phi M_{CCBbAa}(i-1)(1-\Phi)(1-\Phi)F_{CCBbAa}(i-1)+0.5\Phi\Phi M_{CCBbAa}(i-1)\Phi(1-\Phi)F_{CCBbAa}(i-1)+0.5\Phi\Phi M_{CCBbAa}(i-1)(1-\Phi)\Phi F_{CCBbAa}(i-1)+\Phi\Phi M_{CCBbAa}(i-1)\Phi\Phi F_{CCBbAa}(i-1)+0.5\Phi\Phi M_{CCBbAa}(i-1)(1-\Phi)F_{CCBbAA}(i-1)+\Phi\Phi M_{CCBbAa}(i-1)\Phi F_{CCBbAA}(i-1)+0.5\Phi\Phi M_{CCBbAa}(i-1)(1-\Phi)F_{CCBbAA}(i-1)+\Phi\Phi M_{CCBbAa}(i-1)\Phi F_{CCBbAA}(i-1)+\Phi\Phi M_{CCBbAa}(i-1)F_{CCBbAA}(i-1)+0.0625(1-\Phi)M_{CCBbAa}(i-1)(1-\Phi)(1-\Phi)F_{CcBbAa}(i-1)+0.125(1-\Phi)M_{CCBbAA}(i-1)\Phi(1-\Phi)F_{CcBbAa}(i-1)+0.125(1-\Phi)M_{CCBbAA}(i-1)(1-\Phi)\Phi F_{CcBbAa}(i-1)+0.25(1-\Phi)M_{CCBbAA}(i-1)\Phi\Phi F_{CcBbAa}(i-1)+0.125(1-\Phi)M_{CCBbAA}(i-1)(1-\Phi)F_{CcBbAA}(i-1)+0.25(1-\Phi)M_{CCBbAA}(i-1)\Phi F_{CcBbAA}(i-1)+0.25(1-\Phi)M_{CCBbAA}(i-1)F_{CcBbAA}(i-1)+0.125(1-\Phi)M_{CCBbAA}(i-1)(1-\Phi)(1-\Phi)F_{CCBbAa}(i-1)+0.25(1-\Phi)M_{CCBbAA}(i-1)\Phi(1-\Phi)F_{CCBbAa}(i-1)+0.25(1-\Phi)M_{CCBbAA}(i-1)(1-\Phi)\Phi F_{CCBbAa}(i-1)+0.5(1-\Phi)M_{CCBbAA}(i-1)\Phi\Phi F_{CCBbAa}(i-1)+0.25(1-\Phi)M_{CCBbAA}(i-1)(1-\Phi)F_{CCBbAA}(i-1)+0.5(1-\Phi)M_{CCBbAA}(i-1)\Phi F_{CCBbAA}(i-1)+0.25(1-\Phi)M_{CCBbAA}(i-1)F_{CCBbAA}(i-1)+0.125\Phi M_{CCBbAA}(i-1)(1-\Phi)(1-\Phi)F_{CcBbAa}(i-1)+0.25\Phi M_{CCBbAA}(i-1)\Phi(1-\Phi)F_{CcBbAa}(i-1)+0.25\Phi M_{CCBbAA}(i-1)(1-\Phi)F_{CcBbAA}(i-1)+0.5\Phi M_{CCBbAA}(i-1)(1-\Phi)\Phi F_{CcBbAA}(i-1)+0.5\Phi M_{CCBbAA}(i-1)F_{CcBbAA}(i-1)+0.25\Phi M_{CCBbAA}(i-1)(1-\Phi)F_{CcBbAA}(i-1)+0.5\Phi M_{CCBbAA}(i-1)(1-\Phi)\Phi F_{CcBbAA}(i-1)+\Phi M_{CCBbAA}(i-1)\Phi F_{CcBbAA}(i-1)+0.5\Phi M_{CCBbAA}(i-1)(1-\Phi)F_{CCBbAA}(i-1)+\Phi M_{CCBbAA}(i-1)\Phi F_{CCBbAA}(i-1)+0.5\Phi M_{CCBbAA}(i-1)(1-\Phi)F_{CCBbAA}(i-1)+\Phi M_{CCBbAA}(i-1)\Phi F_{CCBbAA}(i-1)+\Phi M_{CCBbAA}(i-1)F_{CCBbAA}(i-1)+0.0625(1-\Phi)M_{CCBbAA}(i-1)(1-\Phi)(1-\Phi)F_{CcBbAa}(i-1)+0.125(1-\Phi)M_{CCBbAA}(i-1)\Phi(1-\Phi)F_{CcBbAa}(i-1)+0.125(1-\Phi)M_{CCBbAA}(i-1)(1-\Phi)\Phi F_{CcBbAa}(i-1)+0.25(1-\Phi)M_{CCBbAA}(i-1)\Phi\Phi F_{CcBbAa}(i-1)+0.25(1-\Phi)M_{CCBbAA}(i-1)F_{CcBbAA}(i-1)+0.125(1-\Phi)M_{CCBbAA}(i-1)(1-\Phi)F_{CcBbAA}(i-1)+0.25(1-\Phi)M_{CCBbAA}(i-1)\Phi F_{CcBbAA}(i-1)+0.25(1-\Phi)M_{CCBbAA}(i-1)F_{CcBbAA}(i-1)+0.125(1-\Phi)M_{CCBbAA}(i-1)(1-\Phi)F_{CcBbAA}(i-1)+0.25(1-\Phi)M_{CCBbAA}(i-1)\Phi(1-\Phi)F_{CcBbAA}(i-1)+0.25(1-\Phi)M_{CCBbAA}(i-1)(1-\Phi)\Phi F_{CcBbAA}(i-1)+0.5(1-\Phi)M_{CCBbAA}(i-1)\Phi\Phi F_{CcBbAA}(i-1)+0.25\Phi M_{CCBbAA}(i-1)(1-\Phi)F_{CcBbAA}(i-1)+0.5\Phi M_{CCBbAA}(i-1)\Phi F_{CcBbAA}(i-1)+0.25\Phi M_{CCBbAA}(i-1)(1-\Phi)F_{CcBbAA}(i-1)+0.5\Phi M_{CCBbAA}(i-1)F_{CcBbAA}(i-1)+0.25\Phi M_{CCBbAA}(i-1)(1-\Phi)F_{CcBbAA}(i-1)+0.5\Phi M_{CCBbAA}(i-1)\Phi F_{CcBbAA}(i-1)+0.25\Phi M_{CCBbAA}(i-1)(1-\Phi)F_{CcBbAA}(i-1)+0.5\Phi M_{CCBbAA}(i-1)\Phi F_{CcBbAA}(i-1)+\Phi M_{CCBbAA}(i-1)\Phi F_{CcBbAA}(i-1)+0.5\Phi M_{CCBbAA}(i-1)(1-\Phi)F_{CCBbAA}(i-1)+\Phi M_{CCBbAA}(i-1)\Phi F_{CCBbAA}(i-1)+\Phi M_{CCBbAA}(i-1)F_{CCBbAA}(i-1)+0.125M_{CCBbAA}(i-1)(1-\Phi)(1-\Phi)F_{CcBbAa}(i-1)+0.25M_{CCBbAA}(i-1)\Phi(1-\Phi)F_{CcBbAa}(i-1)+0.25M_{CCBbAA}(i-1)(1-\Phi)\Phi F_{CcBbAa}(i-1)+0.25M_{CCBbAA}(i-1)(1-\Phi)F_{CcBbAA}(i-1)+0.5M_{CCBbAA}(i-1)\Phi F_{CcBbAA}(i-1)+0.25M_{CCBbAA}(i-1)(1-\Phi)F_{CcBbAA}(i-1)+0.5M_{CCBbAA}(i-1)\Phi F_{CcBbAA}(i-1)+0.25M_{CCBbAA}(i-1)(1-\Phi)F_{CcBbAA}(i-1)+0.5M_{CCBbAA}(i-1)\Phi F_{CcBbAA}(i-1)+\Phi M_{CCBbAA}(i-1)\Phi F_{CcBbAA}(i-1)+0.5M_{CCBbAA}(i-1)(1-\Phi)F_{CCBbAA}(i-1)+M_{CCBbAA}(i-1)\Phi F_{CCBbAA}(i-1)+0.5M_{CCBbAA}(i-1)(1-\Phi)F_{CCBbAA}(i-1)+M_{CCBbAA}(i-1)\Phi F_{CCBbAA}(i-1)+0.5M_{CCBbAA}(i-1)(1-\Phi)F_{CCBbAA}(i-1)+M_{CCBbAA}(i-1)\Phi F_{CCBbAA}(i-1)+M_{CCBbAA}(i-1)F_{CCBbAA}(i-1)],
\end{aligned}$$

alongside an identical set of equations for females of each genotype.

The second stage is to normalise these proportional frequencies to fill the range from zero to one. We begin by calculating the overall fitness of the entire population by summing the proportional genotype

frequencies resulting from the above equations to give:

$$\begin{aligned}
\bar{\Omega} = & M_{ccbbaa}^e + M_{ccBBAA}^e \\
& + M_{Ccbbaa}^e \\
& + M_{CCbbaa}^e \\
& + F_{ccbbaa}^e \\
& + F_{Ccbbaa}^e \\
& + F_{CCbbaa}^e + F_{CCBBAA}^e.
\end{aligned}$$

This is then used as a normalising factor to give the final genotype frequencies for a particular generation as follows:

$$\begin{aligned}
M_{ccbbaa}(i) &= M_{ccbbaa}^e/\bar{\Omega}, & M_{ccbbAa}(i) &= M_{ccbbAa}^e/\bar{\Omega}, & M_{ccbbAA}(i) &= M_{ccbbAA}^e/\bar{\Omega}, \\
M_{ccBbaa}(i) &= M_{ccBbaa}^e/\bar{\Omega}, & M_{ccBbAa}(i) &= M_{ccBbAa}^e/\bar{\Omega}, & M_{ccBbAA}(i) &= M_{ccBbAA}^e/\bar{\Omega}, \\
M_{ccBBaa}(i) &= M_{ccBBaa}^e/\bar{\Omega}, & M_{ccBBAa}(i) &= M_{ccBBAa}^e/\bar{\Omega}, & M_{ccBBAA}(i) &= M_{ccBBAA}^e/\bar{\Omega}, \\
M_{Ccbbaa}(i) &= M_{Ccbbaa}^e/\bar{\Omega}, & M_{CcbbAa}(i) &= M_{CcbbAa}^e/\bar{\Omega}, & M_{CcbbAA}(i) &= M_{CcbbAA}^e/\bar{\Omega}, \\
M_{CcBbaa}(i) &= M_{CcBbaa}^e/\bar{\Omega}, & M_{CcBbAa}(i) &= M_{CcBbAa}^e/\bar{\Omega}, & M_{CcBbAA}(i) &= M_{CcBbAA}^e/\bar{\Omega}, \\
M_{CcBBaa}(i) &= M_{CcBBaa}^e/\bar{\Omega}, & M_{CcBBAa}(i) &= M_{CcBBAa}^e/\bar{\Omega}, & M_{CcBBAA}(i) &= M_{CcBBAA}^e/\bar{\Omega}, \\
M_{CCbbaa}(i) &= M_{CCbbaa}^e/\bar{\Omega}, & M_{CCbbAa}(i) &= M_{CCbbAa}^e/\bar{\Omega}, & M_{CCbbAA}(i) &= M_{CCbbAA}^e/\bar{\Omega}, \\
M_{CCBbaa}(i) &= M_{CCBbaa}^e/\bar{\Omega}, & M_{CCBbAa}(i) &= M_{CCBbAa}^e/\bar{\Omega}, & M_{CCBbAA}(i) &= M_{CCBbAA}^e/\bar{\Omega}, \\
M_{CCBBaa}(i) &= M_{CCBBaa}^e/\bar{\Omega}, & M_{CCBBAa}(i) &= M_{CCBBAa}^e/\bar{\Omega}, & M_{CCBBAA}(i) &= M_{CCBBAA}^e/\bar{\Omega}, \\
F_{ccbbaa}(i) &= F_{ccbbaa}^e/\bar{\Omega}, & F_{ccbbAa}(i) &= F_{ccbbAa}^e/\bar{\Omega}, & F_{ccbbAA}(i) &= F_{ccbbAA}^e/\bar{\Omega}, \\
F_{ccBbaa}(i) &= F_{ccBbaa}^e/\bar{\Omega}, & F_{ccBbAa}(i) &= F_{ccBbAa}^e/\bar{\Omega}, & F_{ccBbAA}(i) &= F_{ccBbAA}^e/\bar{\Omega}, \\
F_{ccBBaa}(i) &= F_{ccBBaa}^e/\bar{\Omega}, & F_{ccBBAa}(i) &= F_{ccBBAa}^e/\bar{\Omega}, & F_{ccBBAA}(i) &= F_{ccBBAA}^e/\bar{\Omega}, \\
F_{Ccbbaa}(i) &= F_{Ccbbaa}^e/\bar{\Omega}, & F_{CcbbAa}(i) &= F_{CcbbAa}^e/\bar{\Omega}, & F_{CcbbAA}(i) &= F_{CcbbAA}^e/\bar{\Omega}, \\
F_{CcBbaa}(i) &= F_{CcBbaa}^e/\bar{\Omega}, & F_{CcBbAa}(i) &= F_{CcBbAa}^e/\bar{\Omega}, & F_{CcBbAA}(i) &= F_{CcBbAA}^e/\bar{\Omega}, \\
F_{CcBBaa}(i) &= F_{CcBBaa}^e/\bar{\Omega}, & F_{CcBBAa}(i) &= F_{CcBBAa}^e/\bar{\Omega}, & F_{CcBBAA}(i) &= F_{CcBBAA}^e/\bar{\Omega}, \\
F_{CCbbaa}(i) &= F_{CCbbaa}^e/\bar{\Omega}, & F_{CCbbAa}(i) &= F_{CCbbAa}^e/\bar{\Omega}, & F_{CCbbAA}(i) &= F_{CCbbAA}^e/\bar{\Omega}, \\
F_{CCBbaa}(i) &= F_{CCBbaa}^e/\bar{\Omega}, & F_{CCBbAa}(i) &= F_{CCBbAa}^e/\bar{\Omega}, & F_{CCBbAA}(i) &= F_{CCBbAA}^e/\bar{\Omega}, \\
F_{CCBBaa}(i) &= F_{CCBBaa}^e/\bar{\Omega}, & F_{CCBBAa}(i) &= F_{CCBBAa}^e/\bar{\Omega}, & F_{CCBBAA}(i) &= F_{CCBBAA}^e/\bar{\Omega}.
\end{aligned}$$

We then insert these values into the proportional genotype frequency equations to calculate the values for the next generation and so on until the desired end point is reached.
